# Supplementary material for: Assessment of liquid media requirements for storing and evaluating respiratory cilia motility
Source: PeerJ. 2025 Mar 27;13:e19191. doi: 10.7717/peerj.19191 (PMC11955192; doi:10.7717/peerj.19191)
Supplement: Supplemental Information 2 [file peerj-13-19191-s002.xlsx]

## Sheet: Sheet1
	Components	Saline			DPBS			HBSS			L-15			Medium 199			RPMI 1640			DMEM			MEM
		Aero healthcare AW2000LB			Sigma-Aldrich D8662			Sigma-Aldrich H1641			Thermo Fisher 21083027			Thermo Fisher 12350039			Thermo Fisher 11835030			Sigma-Aldrich D5796			Thermo Fisher 11575032
		Mwt	mg/L	mM	Mwt	mg/L	mM	Mwt	mg/L	mM	Mwt	mg/L	mM	Mwt	mg/L	mM	Mwt	mg/L	mM	Mwt	mg/L	mM	Mwt	mg/L	mM
	Inorganic Salts
	Calcium Chloride (CaCl2) (anhyd.)										111	140	1.26126	111	140	1.26126				111	200	1.8018	111	140	1.26126
	CaCl2•2H2O				147.01	133	0.9047	147.01	185	1.25842
	Calcium nitrate (Ca(NO3)2 4H2O)																236	100	0.423729
	Ferric nitrate (Fe(NO3)-9H2O)													404	0.72	0.00178218				279.979	0.1	0.00035717
	Magnesium Chloride (anhydrous)										95	93.7	0.986316
	MgCl2 • 6H2O				203.295	100	0.491896
	Magnesium Sulfate (MgSO4) (anhyd.)							120.371	97.67	0.811408	120	97.67	0.813917	120	97.67	0.813917	120	48.84	0.407	120.371	97.67	0.811408	120	98	0.816667
	Potassium Chloride (KCl)				74.5483	200	2.68282	74.5483	400	5.36565	75	400	5.33333	75	400	5.33333	75	400	5.33333	74.5483	400	5.36565	75	400	5.33333
	Potassium Phosphate monobasic (KH2PO4)				136.084	200	1.46968	136.084	60	0.440904	136	60	0.441176	136	60	0.441176							136	60	0.441176
	NaH2PO4													119.975	122	1.01687				119.975	109	0.908519
	Sodium Phosphate dibasic (Na2HPO4) anhydrous				141.957	1150	8.10104	141.957	47.88	0.337285	142	190	1.33803	268	90	0.335821	142	800	5.6338				142	48	0.338028
	Sodium Bicarbonate (NaHCO3)							84.006	350	to add				84	350	4.16667	84	2000	23.8095	84.006	3700	44.0445	84	350	4.16667
	Sodium Chloride (NaCl)	58.44	9000	154.004	58.44	8000	136.893	58.44	8000	136.893	58	8000	137.931	58	7500	129.31	58	6000	103.448	58.44	6400	109.514	58	8000	137.931
	Amino Acids
	Glycine										75	200	2.66667	75	50	0.666667	75	10	0.133333	75	30	0.4
	L-Alanine										89	225	2.52809	89	25	0.280899
	L-Arginine										174	500	2.87356				174	200	1.14943
	L-Arginine hydrochloride													211	70	0.331754				211	84	0.398104	211	126	0.597156
	L-Asparagine										132	250	1.89394				132	50	0.378788
	L-Aspartic acid													133	30	0.225564	133	20	0.150376
	L-Cysteine										121	120	0.991735
	L-Cysteine hydrochloride-H2O													176	0.11	0.000625
	L-Cystine 2HCl													240	26	0.108333	313	65	0.207668	313	62.6	0.2	313	31	0.0990415
	L-Glutamine										146	300	2.05479	146	100	0.684932	146	300	2.05479	146	584	4	146	292	2
	L-Glutamic Acid													165	75	0.454545	147	20	0.136054
	L-Histidine										155	250	1.6129				155	15	0.0967742
	L-Histidine hydrochloride-H2O													210	21.88	0.10419				210	42	0.2	210	42	0.2
	L-Hydroxyproline													131	10	0.0763359	131	20	0.152672
	L-Isoleucine										131	250	1.9084	131	40	0.305344	131	50	0.381679	131	105	0.801527	131	52	0.396947
	L-Leucine										131	125	0.954198	131	60	0.458015	131	50	0.381679	131	105	0.801527	131	52	0.396947
	L-Lysine										146	75	0.513699
	L-Lysine hydrochloride													183	70	0.382514	183	40	0.218579	183	146	0.797814	183	73	0.398907
	L-Methionine										149	75	0.503356	149	15	0.100671	149	15	0.100671	149	30	0.201342	149	15	0.100671
	L-Phenylalanine										165	125	0.757576	165	25	0.151515	165	15	0.0909091	165	66	0.4	165	32	0.193939
	L-Proline													115	40	0.347826	115	20	0.173913
	L-Serine										105	200	1.90476	105	25	0.238095	105	30	0.285714	105	42	0.4
	L-Threonine										119	300	2.52101	119	30	0.252101	119	20	0.168067	119	95	0.798319	119	48	0.403361
	L-Tryptophan										204	20	0.0980392	204	10	0.0490196	204	5	0.0245098	204	16	0.0784314	204	10	0.0490196
	L-Tyrosine										181	300	1.65746
	L-Tyrosine disodium salt dihydrate													181	40	0.220994	261	29	0.111111	261	103.79	0.397663	261	52	0.199234
	L-Valine										117	100	0.854701	117	25	0.213675	117	20	0.17094	117	94	0.803419	117	46	0.393162
	Vitamins
	Ascorbic Acid													176	0.0566	0.000321591
	Biotin													244	0.01	4.09836e-05	244	0.2	0.000819672
	Choline chloride										140	1	0.00714286	140	0.5	0.00357143	140	3	0.0214286	140	4	0.0285714	140	1	0.00714286
	D-Calcium pantothenate (Vit B5)										477	1	0.00209644	477	0.01	2.09644e-05	477	0.25	0.000524109				477	1	0.00209644
	Folic Acid										441	1	0.00226757	441	0.01	2.26757e-05	441	1	0.00226757	441	4	0.00907029	441	1	0.00226757
	Menadione (Vitamin K3)													172	0.016	9.30233e-05
	Niacinamide										122	1	0.00819672	122	0.025	0.000204918	122	1	0.00819672	122	4	0.0327869	122	1	0.00819672
	Nicotinic acid (Niacin)													123	0.025	0.000203252
	D-Pantothenic Acid • 1⁄2Ca (Vit B5)																			238.27	4	0.0167877
	Para-Aminobenzoic Acid													137	0.05	0.000364964	137	1	0.00729927
	Pyridoxal hydrochloride													204	0.025	0.000122549							204	1	0.00490196
	Pyridoxine hydrochloride										206	1	0.00485437	206	0.025	0.000121359	206	1	0.00485437	206	4.04	0.0196117
	Riboflavin													376	0.01	2.65957e-05	376	0.2	0.000531915	376	0.4	0.00106383	376	0.1	0.000265957
	Riboflavin 5'-phosphate Na										478	0.1	0.000209205
	Thiamine hydrochloride													337	0.01	2.96736e-05	337	1	0.00296736	337	4	0.0118694	337	1	0.00296736
	Thiamine monophosphate										442	1	0.00226244
	i-Inositol										180	2	0.0111111	180	0.05	0.000277778	180	35	0.194444	180	7.2	0.04	180	2	0.0111111
	Vitamin A (acetate) (Retinol Acetate)													328	0.14	0.000426829
	Vitamin B12																1355	0.005	3.69004e-06
	Vitamin D2 (Calciferol)													397	0.1	0.000251889
	alpha Tocopherol phos. Na salt													554.7	0.01	1.80278e-05
	Other Components
	Adenine Hemisulfate													404	10	0.0247525
	Adenosine Triphosphate • 2Na• 3H20													605	1	0.00165289
	Adenosine Monophosphate • Na													347	0.2385	0.00068732
	Cholesterol													387	0.2	0.000516796
	Deoxyribose													134	0.5	0.00373134
	D+ Galactose										180	900	5
	D-Glucose (Dextrose)							180	1000	5.55556				180	1000	5.55556	180	2000	11.1111	180	4500	25	180	1000	5.55556
	Glutathione (reduced)													307	0.05	0.000162866	307	1	0.00325733
	Guanine													188	0.24	0.0012766
	HEPES													238	5960	25.042
	Hypoxanthine													136	0.4	0.00294118
	Ribose													150	0.5	0.00333333
	Sodium Acetate													82	50	0.609756
	Sodium Pyruvate										110	550	5
	Thymine													126	0.3	0.00238095
	Tween 80®														20
	Uracil													112	0.3	0.00267857
	Xanthine-Na													152	0.344	0.00226316
	Phenol Red • Na							376.36	11	0.0292273				376.4	20	0.053135				376.36	15.9	0.0422468	376.4	10	0.0265675
