# Supplementary material for: Assessment of liquid media requirements for storing and evaluating respiratory cilia motility
Source: PeerJ. 2025 Mar 27;13:e19191. doi: 10.7717/peerj.19191 (PMC11955192; doi:10.7717/peerj.19191)
Supplement: Supplemental Information 6 [file peerj-13-19191-s006.xlsx]

## Sheet: CBF
		time																																			% change from baseline (mean)
			220727-28												221117
	Saline-nothing	0	26	23.3333	20.6667	19.3333	27	15.6667	15.6667	20	27.6667
	harvest @ 4°C	30	11	9	13	20.1667	12.3333	15	19.3333	16.3333	20.6667	16.3333																									-49.3174	-58.5324	-40.1024	-7.08191	-43.1741	-30.8874	-10.9215	-24.744	-4.77816	-24.744
	Store @ 4°C	60	18.3333	6.33333	5.66667	16	5.33333	8.33333	12.6667	13.6667	15.3333	20.8333	12	17																							-15.529	-70.8191	-73.8908	-26.2799	-75.4266	-61.6041	-41.6382	-37.0307	-29.3515	-4.01024	-44.7099	-21.6724
	Image @ 37°C	120	9	8.83333	9.66667	12.6667	14	16.3333	11.5	12.5	16.6667																										-58.5324	-59.3003	-55.4608	-41.6382	-35.4949	-24.744	-47.0137	-42.4061	-23.2082
		360													23.6667	36	12.6667	16.5	37.25	10	13.6667	14.6667	10.5	13.5	28												9.04437	65.8703	-41.6382	-23.9761	71.6297	-53.9249	-37.0307	-32.4232	-51.6212	-37.7986	29.0102
		720													31.5	19.3333	33.5	26.6667	25	14.3333	15.6667	14.3333															45.1365	-10.9215	54.3515	22.8669	15.1877	-33.959	-27.8157	-33.959
			220105							220119-20						220216-17		211208-9						221117
	Saline-nothing	0								18.3333	17.8333	28	14.3333	29.6667	29.5	23.3333	22.3333	13.6667	24	29	22.3333	21.3333	19.3333
	harvest @ 4°C	30	16	10.6667	12	11.6667				13	12.6667	16	11	16.6667	6	26.3333	32.6667																				-28.4345	-52.2897	-46.3259	-47.8168				-41.853	-43.344	-28.4345	-50.7987	-25.4526	-73.1629
	Store @ rt	60	13.6667	12.6667	11	12.1667				17.1667	9.66667	9.66667	9	7.66667		17.3333	27.3333																				-38.8711	-43.344	-50.7987	-45.5804				-23.2162	-56.7625	-56.7625	-59.7444	-65.7082
	Image @ 37°C	120	10.75	8.66667	7	10	5.66667	9	7.66667	9.25	27	21	8.66667	10.8333	10	26.6667	33.3333																				-51.9169	-61.2354	-68.6901	-55.2716	-74.6539	-59.7444	-65.7082	-58.6262	20.7668	-6.07029	-61.2354	-51.5442	-55.2716
		360																						7.5	13	5	23.5	5.33333	6.25	7.66667	11	13.6667	4.25				-66.4537	-41.853	-77.6358	5.11182	-76.1448	-72.0447	-65.7082	-50.7987	-38.8711	-80.9904
		720																						0	0	9	0	7.33333	4.5								-100	-100	-59.7444	-100	-67.1991	-79.8722
			221028												221129
	HBSS-nothing-no bicarb	0	22.6667	24	20	30.3333	24.6667	27.3333	24	23	29.6667	22
	harvest @ 4°C	30	21.6667	19	27.3333	21.3333	19.6667	25	17	20	21	23.6667	20.6667	24																							-12.5168	-23.284	10.3634	-13.8627	-20.5922	0.942127	-31.3594	-19.2463	-15.2086	-4.44145	-16.5545	-3.09556
	Store @ 4°C	60	21	22.6667	16.6667	19	15.6667	24.3333	24.8333	19.6667	16.3333	16.3333																									-15.2086	-8.47914	-32.7052	-23.284	-36.7429	-1.74966	0.269179	-20.5922	-34.0511	-34.0511
	Image @ 37°C	120	14.6667	17.6667	20.1667	16	21.3333	16.6667	28.6667	20.6667	24.6667	25.3333	18.3333	32.6667																							-40.7806	-28.6676	-18.5734	-35.397	-13.8627	-32.7052	15.747	-16.5545	-0.403769	2.28802	-25.9758	31.8977
		360													25.6667	41	27.1667	35.6667	23.6667	29.6667	21	34	27	21.6667	22.3333												3.63392	65.5451	9.69044	44.0108	-4.44145	19.7847	-15.2086	37.2813	9.0175	-12.5168	-9.82503
		720													14	12.3333	20.3333	26.6667	21	28.8333	24	17	19.6667	21	20.3333												-43.4724	-50.2019	-17.9004	7.6716	-15.2086	16.4199	-3.09556	-31.3594	-20.5922	-15.2086	-17.9004
			221027										221129
	HBSS-nothing-no bicarb	0	22	21	25.6667	15.6667	24.6667	23	24.6667	23	24.6667	23
	harvest @ 4°C	30	23.5	24.3333	27.3333	25	29	24.6667	29	24.6667	29	24.6667																									3.37243	7.03812	20.2346	9.97067	27.566	8.5044	27.566	8.5044	27.566	8.5044
	Store @ rt	60	25	17.6667	25.6667	27.6667	33.6667	32.3333	33.6667	32.3333	33.6667	32.3333																									9.97067	-22.2874	12.9032	21.7009	48.0938	42.2287	48.0938	42.2287	48.0938	42.2287
	Image @ 37°C	120	26.3333	24.6667	22.8333	24.6667	23.6667	24	23.6667	24	23.6667	24																									15.8358	8.5044	0.439883	8.5044	4.10557	5.57185	4.10557	5.57185	4.10557	5.57185
		360											48.3333	45.6667	36	37.8333	40	36.6667	33.3333	27.6667	30	22.6667	27.5														112.61	100.88	58.3578	66.4223	75.9531	61.2903	46.6276	21.7009	31.9648	-0.293255	20.9677
		720											33	40.6667	29.6667	40.6667	34	35	33.3333	45	41	31.1667	41.6667	41.1667													45.1613	78.8856	30.4985	78.8856	49.5601	53.9589	46.6276	97.9472	80.3519	37.0968	83.2845	81.085
			240229											240313										240321-22
	HBSS+FBS-no bicarb	0												31.1667		30	31.6667	30	22	23.6667	29.3333	26.3333	30.6667
	harvest @ 4°C	30												29	31	34.6667	27.6667	24.5	31	34.8333	31.6667	32.3333	31.3333	29.3333	23	30	30	28.6667									2.41988	9.48332	22.433	-2.28908	-13.4729	9.48332	23.0216	11.8378	14.1923	10.6606	3.59712	-18.7704	5.9516
	Store @ 4°C	60												31.8333	33.6667	37	33.6667	29.3333	32.6667	25.6667	36.3333	33.8333	36.6667	23.6667	28	26.6667	25.6667	29.5	28.8333								12.4264	18.9012	30.6736	18.9012	3.59712	15.3695	-9.35252	28.3192	19.4899	29.4964	-16.416	-1.11184	-5.8208
	Image @ 37°C	120												34	30.3333	24.3333	37.3333	33	27.3333	29	27.6667	32.3333	26.3333	30	29	26.5	26.8333	28	24.3333								20.0785	7.12884	-14.0615	31.8509	16.5468	-3.46632	2.41988	-2.28908	14.1923	-6.99804	5.9516	2.41988	-6.40942
		360	24	22	24.6667	33	27.6667	23.3333	29.1667	30.3333	32.6667	29																									-15.2387	-22.3022	-12.8842	16.5468	-2.28908	-17.5932	3.0085	7.12884	15.3695	2.41988
		720	24.8333	25.6667	31	25	18.3333	29	27	22.6667	33.5	19.3333	27																								-12.2956	-9.35252	9.48332	-11.707	-35.2518	2.41988	-4.64356	-19.9477	18.3126	-31.7201	-4.64356
			240229										240305-07
	HBSS+FBS-no bicarb	0											29.6667	21.6667	31	29.3333	28.3333	26	20.6667	29.3333	18	24.6667
	harvest @ 4°C	30											25.3333	27.6667	32.1667	36	33.6667	36.6667	31.6667	27.1667	27.3333	22															-2.06186	6.95876	24.3557	39.1753	30.1546	41.7526	22.4227	5.02577	5.6701	-14.9485
	Store @ rt	60											31.3333	24.8333	32.3333	28.3333	37	36	36	35.3333	30.3333	25.3333															21.134	-3.99485	25	9.53608	43.0412	39.1753	39.1753	36.5979	17.268	-2.06186
	Image @ 37°C	120											34.3333	29.6667	35.6667	30.3333	36.6667	30	33.6667	25	33	26															32.732	14.6907	37.8866	17.268	41.7526	15.9794	30.1546	-3.35052	27.5773	0.515464
		360	35.6667	31.6667	37.3333	33.3333	30.3333	35	36.3333	35.3333	31.8333	33																									37.8866	22.4227	44.3299	28.866	17.268	35.3093	40.4639	36.5979	23.067	27.5773
		720	33.6667	29	32.6667	38	32.6667	20	37	39.6667	37	39																									30.1546	12.1134	26.2887	46.9072	26.2887	-22.6804	43.0412	53.3505	43.0412	50.7732
			220105				220112-13				220216-17
	HBSS-FBS+bicard no co2	0	25.3333	28	35		25.3333	25.3333	22.3333		26	22.5	22.3333	25.3333
	harvest @ 4°C	30	24	16	29.3333	18.6667	22.3333	22	14.3333	21.6667	20.6667	27	27	28
	Store @ rt	60	14.6667	25.3333	28.3333	35.6667	34.3333	30	37.3333	28	26.8333	28.6667	26.3333	27.5
	Image @ 37°C	120	26.6667	27	18	28.6667	20.6667	29.3333	23	21	27.3333	22.6667	38.6667	29.3333
			220715											221123
	RPMI-nothing	0	21.6667	14.5	22	21.3333	20.9524	27.6667	18.3333	23.3333	18.8333
	harvest @ 4°C	30	23	21.3333	25	25	19.3333	27.6667	22.3333	15.6667	19.3333	23																									9.74501	1.79248	19.2881	19.2881	-7.75057	32.0121	6.564	-25.2461	-7.75057	9.74501
	Store @ 4°C	60	15.6667	25	21.5	28.3333	23	24.6667	24	16.6667	22.6667	28.3333	34																								-25.2461	19.2881	2.58773	35.1931	9.74501	17.6976	14.5165	-20.4746	8.15451	35.1931	62.2318
	Image @ 37°C	120	21	25	20.3333	19	23	22.6667	28	25.5	24.6667	35	33.6667																								0.201969	19.2881	-2.97905	-9.34108	9.74501	8.15451	33.6026	21.6738	17.6976	67.0033	60.6413
		360												24.3333	26.3333	30	21.1667	24.6667	29.6667	25.6667	24	26.6667	31.6667														16.107	25.6501	43.1457	0.997223	17.6976	41.5552	22.4691	14.5165	27.2406	51.0982
		720												23	26	14.6667	17.6667	22	28	19.3333	26	14	20	27.3333	23												9.74501	24.0596	-30.0177	-15.7031	4.97349	33.6026	-7.75057	24.0596	-33.1987	-4.56955	30.4216	9.74501
			220119-20				220202-04		220209-10					220216-17		221123
	RPMI-nothing	0	19.1667	27.6667	20.5		22.3333	20	26	25.3333	27	25.8333		19	17.6667
	harvest @ 4°C	30	24.1667	23	15.6667	21.3333	24	19	16.3333	21.3333	29	24.1667	17.6667	13.5	25																						6.12109	0.998004	-31.2043	-6.32069	5.38922	-16.5669	-28.2768	-6.32069	27.3453	6.12109	-22.4218	-40.7186	9.78044
	Store @ rt	60	28.6667	26.3333	41	28.3333	30.6667	35.6667	37	28.6667	30	28		18.6667	24.1667																						25.8816	15.6354	80.0399	24.4178	34.664	56.6201	62.475	25.8816	31.7365	22.9541		-18.0306	6.12109
	Image @ 37°C	120	38.6667	37.5	31.8333		36.3333	39	36	31.3333	29.75	33		27.3333	24																						69.7937	64.6707	39.7871		59.5476	71.2575	58.0838	37.5915	30.6387	44.9102		20.0266	5.38922
		360														21	23.3333	30.6667	27.6667	23	37	29.6667	31.6667	32	28												-7.78443	2.46174	34.664	21.4904	0.998004	62.475	30.2728	39.0552	40.519	22.9541
		720														35.6667	30.6667	28.3333	16.3333	36.3333	32.6667	28.3333	20.6667	28.6667	23												56.6201	34.664	24.4178	-28.2768	59.5476	43.4464	24.4178	-9.24817	25.8816	0.998004
			230629-30										230721
	RPMI+FBS	0	26	25	26	20.3333	25.3333	13.6667	29.3333	24.6667	23.6667	17
	harvest @ 4°C	30	29.6667	20.6667	22	23	18.3333	17.6667	25.6667	24	22.8333	18.3333																									28.4271	-10.5339	-4.7619	-0.4329	-20.6349	-23.5209	11.1111	3.8961	-1.1544	-20.6349
	Store @ 4°C	60	24.1667	23	25.6667	14.6667	19.6667	31	26	26.3333	27	21																									4.6176	-0.4329	11.1111	-36.5079	-14.8629	34.1991	12.5541	13.9971	16.8831	-9.09091
	Image @ 37°C	120	27.6667	27.3333	27.8333	18	22	23.3333	26	32.3333	23	29																									19.7691	18.3261	20.4906	-22.0779	-4.7619	1.0101	12.5541	39.9711	-0.4329	25.5411
		360											24.6667	27.3333	21.6667	31	25.8333	24.3333	29	27.6667	24																6.78211	18.3261	-6.20491	34.1991	11.8326	5.33911	25.5411	19.7691	3.8961
		720											20.6667	24	23	30.3333	26	22.6667	25.8333	21																	-10.5339	3.8961	-0.4329	31.3131	12.5541	-1.8759	11.8326	-9.09091
			230621-23											230721
	RPMI+FBS	0	21.6667	14.6667	25.3333	32	19.3333	30.6667	14.1667	28	22	32.6667	23
	harvest @ 4°C	30	24.6667	29	28.8333	21	24.6667	21.8333	28.6667	21.6667	25	30																									2.9728	21.0626	20.3669	-12.334	2.9728	-8.85515	19.6711	-9.55092	4.36433	25.2372
	Store @ rt	60	31.6667	30	32.3333	27	30	28.8333	26	29	29.3333	33																									32.1948	25.2372	34.9779	12.7135	25.2372	20.3669	8.5389	21.0626	22.4541	37.7609
	Image @ 37°C	120	34.3333	23.1667	35	28.3333	30.3333	38	31.3333	37	37.3333	23.6667																									43.327	-3.28906	46.1101	18.2796	26.6287	58.6338	30.8033	54.4592	55.8507	-1.20177
		360												31.1667	36	42.1667	25	26.6667	23.6667	28.3333	35.6667	41.6667															30.1075	50.2846	76.0278	4.36433	11.3219	-1.20177	18.2796	48.8931	73.9405
		720												29.3333	27.6667	34.5	37.1667	28	28.6667	34	32																22.4541	15.4965	44.0228	55.155	16.888	19.6711	41.9355	33.5863
			221005-07										221103
	DPBS-nothing	0	20.8333	23	19.3333	18	25	20.3333	29.8333	18.3333	24.6667	20.3333
	harvest @ 4°C	30	22.6667	22	24.3333	20.3333	26	27.3333	25.5	21	27.3333	21.1667																									3.18665	0.151745	10.7739	-7.43551	18.3612	24.431	16.085	-4.40061	24.431	-3.64188
	Store @ 4°C	60	23	27	26	26.6667	28	26.6667	23.3333	24.3333	25.3333	24.3333																									4.7041	22.9135	18.3612	21.3961	27.4659	21.3961	6.22155	10.7739	15.3263	10.7739
	Image @ 37°C	120	23.3333	21.6667	26.6667	25	25.5	27.6667	26.5	25.5	30.3333	28.3333																									6.22155	-1.36571	21.3961	13.8088	16.085	25.9484	20.6373	16.085	38.088	28.9833
		360											21.8333	24.3333	24.6667	27.3333	27	19.3333	24.6667	23.3333																	-0.60698	10.7739	12.2914	24.431	22.9135	-11.9879	12.2914	6.22155
		720											20	20.6667	20.3333	19.3333	25	18	21.6667	19.6667	25.6667																-8.95296	-5.91806	-7.43551	-11.9879	13.8088	-18.0577	-1.36571	-10.4704	16.8437
			220112-13							220209-10						221103
	DPBS-nothing	0	20.6667	30	23.3333	22	14.3333	21.6667	21.3333	21.6667	25.6667	20.3333	20	17
	harvest @ 4°C	30	28.6667	23.6667	20	30.3333				16	15	24.3333	19.6667	28.3333	16.1667																						33.3333	10.0775	-6.97674	41.0853				-25.5814	-30.2326	13.1783	-8.52713	31.7829	-24.8062
	Store @ rt	60	32.3333	29.8333	30	21.6667	22	19		26.6667	28	26	33.6667	27.6667	27.3333																						50.3876	38.7597	39.5349	0.775194	2.32558	-11.6279		24.031	30.2326	20.9302	56.5891	28.6822	27.1318
	Image @ 37°C	120	34	15	27.3333	25.6667	20.6667	28.6667		20.3333	24.3333	28	32.3333	25.3333	24.5																						58.1395	-30.2326	27.1318	19.3798	-3.87597	33.3333		-5.42636	13.1783	30.2326	50.3876	17.8295	13.9535
		360														19.1667	13.6667	15.3333	16	22.3333	17	18.3333	27.3333	24.3333													-10.8527	-36.4341	-28.6822	-25.5814	3.87597	-20.9302	-14.7287	27.1318	13.1783
		720														11	7.33333	10.3333	26	19.3333	11.6667	11	23.3333	26.6667													-48.8372	-65.8915	-51.938	20.9302	-10.0775	-45.7364	-48.8372	8.52713	24.031
			230728														231129
	DPBS+FBS	0															26.5	22	23.6667	24.6667	23	23	25.3333	17	28	23.3333
	harvest @ 4°C	30															21.6667	19	29.6667	22.6667	18.6667	20.6667	27	15.5	25.6667	26											-8.38619	-19.6617	25.4405	-4.15786	-21.0712	-12.6145	14.1649	-34.4609	8.52713	9.93658
	Store @ 4°C	60															26	29.6667	23.8333	27	27	24.3333	23.3333	26.3333	22.6667	23	22.6667										9.93658	25.4405	0.775194	14.1649	14.1649	2.88936	-1.33897	11.346	-4.15786	-2.74841	-4.15786
	Image @ 37°C	120															26	20.3333	27.6667	32.3333	25	22.6667	25.6667	25.6667	30.6667	26											9.93658	-14.024	16.9838	36.716	5.70825	-4.15786	8.52713	8.52713	29.6688	9.93658
		360	25.6667	26	25.3333	21.6667	20.6667	24.6667	27	21.6667	15.5	29	23.3333	31.6667	19.1667	33																					8.52713	9.93658	7.11769	-8.38619	-12.6145	4.2988	14.1649	-8.38619	-34.4609	22.6216	-1.33897	33.8971	-18.957
		720	17.6667	23	20.3333	22	24.1667	21	27.3333	25.6667	27.3333	27.3333																									-25.2995	-2.74841	-14.024	-6.97674	2.18464	-11.2051	15.5743	8.52713	15.5743	15.5743
			230728											231122-23
	DPBS+FBS	0												29.5	33.3333	31.1667	22.6667	30	27.6667	27.3333	25.6667	24.3333	21.6667
	harvest @ 4°C	30												34.3333	35.3333	37.6667	28	39	39.3333	36.5	32.8333	36	32.3333														25.6098	29.2683	37.8049	2.43902	42.6829	43.9024	33.5366	20.122	31.7073	18.2927
	Store @ rt	60												36.6667	38	32.6667	41	35.3333	35.6667	33.6667	30.3333	33.6667	28.6667														34.1463	39.0244	19.5122	50	29.2683	30.4878	23.1707	10.9756	23.1707	4.87805
	Image @ 37°C	120												44.3333	33.6667	42	37	40.3333	43	55.6667	43.3333	39.6667	37.6667														62.1951	23.1707	53.6585	35.3659	47.561	57.3171	103.659	58.5366	45.122	37.8049
		360	31.8333	31	33	31.6667	29	34.6667	31.3333	35.6667	37.1667	40.6667	31																								16.4634	13.4146	20.7317	15.8537	6.09756	26.8293	14.6341	30.4878	35.9756	48.7805	13.4146
		720	33	38	34.3333	33.6667	33.3333	43.6667	31.6667	33.3333	31.3333	43.6667	41																								20.7317	39.0244	25.6098	23.1707	21.9512	59.7561	15.8537	21.9512	14.6341	59.7561	50
			230302-3										230316
	DPBS-nothing-w/o CaMg	0	27.3333	23.6667	24.3333	31	20.3333	31.3333	22	28.6667
	harvest @ 4°C	30	16	22.3333	21	18.6667	23.6667	28.8333	23.6667	16.3333	33.6383	29.3333
	Store @ 4°C	60	17.8333	24.3333	22.8333	23.3333	21.6667	31.5	27	32.6667	32.3333	32.6667
	Image @ 37°C	120	23.3333	17	24.6667	16	23.3333	24.6667	26	22.3333	30.6667	21
		360											28.3333	31.3333	28.3333	30	28.3333	33	32.6667	31.6667	36.6667	30	35.6667
		720											21	25.3333	18.1667	27.3333	28.3333	29	18.6667	22.3333	22.3333	27.3333	30.3333
			230201-02										230316
	DPBS-nothing-w/o CaMg	0	24.3333	25	19.3333	30	26.6667	25.6667	27	29	29	31
	harvest @ 4°C	30	32	32.3333	30	28	31	30	24.5	24.6667	26.3333	26.3333
	Store @ rt	60	34.5	39.5	28.6667	33.6667	33	40	33.3333	30.6667	31.3333	34
	Image @ 37°C	120	34	24.6667	22.6667	28.6667	33.6667	37.6667	38.6667	36	34.3333	27.6667
		360											18	51.3333	49	44.3333	29	37.8333	33	19
		720											29.3333	36	21	27	25.3333	35	38.6667	30.3333	26.6667
			220622-23							221121													230615						240327-28
	L15-nothing	0	26.3333	24.6667	19.3333	12.3333	32	26.6667															29	31.3333	29.6667	28.6667	32.6667		23.6667	27	26.3333	22
	harvest @ 4°C	30	22.3333	15.6667	20	12.6667	21.6667	29	23.3333														19	25	17.8333	23.3333	26.6667	27	18.3333	25	22.3333	17.6667					-14.4681	-40	-23.4043	-51.4894	-17.0213	11.0638	-10.6383	-27.234	-4.25532	-31.7021	-10.6383	2.12766	3.40426
	Store @ 4°C	60	17.6667	16.3333	16.6667	20	15	17.3333															24.5	18.6667	30	21	26.3333	24	24.3333	26.6667	23.6667	21					-32.3404	-37.4468	-36.1702	-23.4043	-42.5532	-33.617		-6.17021	-28.5106	14.8936	-19.5745	0.851064	-8.08511
	Image @ 37°C	120	22.6667	18.6667	17.3333	12.6667	11.1667	18.3333	17.6667														21.6667	26.6667	26.3333	19.8333	27	19.5	25.8333	25.6667	25	22					-13.1915	-28.5106	-33.617	-51.4894	-57.234	-29.7872	-32.3404	-17.0213	2.12766	0.851064	-24.0426	3.40426	-25.3191
		360								15.3333	16	14	16.1667	16.6667	14.5	15.6667	15.6667	11	13	12.3333	11.5	10.3333															-41.2766	-38.7234	-46.383	-38.0851	-36.1702	-44.4681	-40	-40	-57.8723	-50.2128	-52.766	-55.9574	-60.4255
		720								12.6667	13	14.8333	24	13.6667	13.1667	12.3333	21	15	16.3333	15.3333	15																-51.4894	-50.2128	-43.1915	-8.08511	-47.6596	-49.5745	-52.766	-19.5745	-42.5532	-37.4468	-41.2766	-42.5532
			220126-27				220202-04									221121												240327-28
	L15-nothing	0	20.875	14.75	23.6	15.2	23.25	19.5	16.3333	19.3333	18	22.3333	16.6667	24														31	26.3333	28.3333	22
	harvest @ 4°C	30	11.8	13	22.375	18.3	12.3	20	23.1667	24.8333	18	16.6667																15.3333	18.3333	20.1667	18						-44.7158	-39.0937	4.82907	-14.2627	-42.3733	-6.29804	8.5381	16.3466	-15.6682	-21.915
	Store @ rt	60	22.6	11.6	18.5	9.8	9.7	14.5	15	18.6667	13.6667	17	14.8333	19.3333														17	17	15.6667	15.6667						5.88321	-45.6529	-13.3257	-54.086	-54.5545	-32.0661	-29.7235	-12.5448	-35.9703	-20.3533	-30.5044	-9.42144
	Image @ 37°C	120	18	5.625	6.33333	11.6667	20.5	13.8	11.6667	13.1667	18.3333	25	8	9.33333	22.6667													21.6667	15.3333	16	14						-15.6682	-73.6463	-70.3277	-45.3405	-3.95549	-35.3456	-45.3405	-38.3129	-14.1065	17.1274	-62.5192	-56.2724	6.19555
		360														8	14	22.6667	14.3333	17.3333	12.6667	10.6667	9.66667	10	14.6667												-62.5192	-34.4086	6.19555	-32.8469	-18.7916	-40.6554	-50.0256	-54.7107	-53.149	-31.2852
		720														15.3333	10	19	12	14	15	13.6667	14.3333	12	14.3333	20.3333	13.5										-28.1618	-53.149	-10.9831	-43.7788	-34.4086	-29.7235	-35.9703	-32.8469	-43.7788	-32.8469	-4.73634	-36.7512
			220316						220615-16							220324						230217
	L15-nothing	0							27.5	26.6667	27	19	21.6667	20.3333
	harvest @ 4°C	30	8.66667	8.66667	9	11	13.3333	9.83333	12.1667	23	8.33333	7.33333	7.33333	6.66667	11.3333	14	14.6667	10.6667	10	16.5	6
	Store @ 37	60	10	6.66667	10	12.6667	6.33333	10.3333	8.33333	6.16667	6.66667	10.6667	18.3333	15		11	19.6667	9	15.8333	14	14
	Image @ 37°C	120	7.66667	5	9.66667	10.3333	18	12	11.3333	13.3333	14	13.6667	7.33333	6		12	12.3333	5	6.66667	6.33333	10
		360																				29.8333	21.6667	18	14.3333	6.66667	14.5	18	17	13.3333	17	14.6667
		720																				18	18.1667	20.3333	16	28	21.6667	19.5	14.5	11.3333	20
			220622-23				220721-22								221122
	L15 + FBS	0	31.6667	33.3333	12.6667	21.6667	18.3333	15	20.6667	16	25.6667	24	20.6667	24
	harvest @ 4°C	30	26.3333	12.1667	26.6667	19.3333	20	18.3333	17.8333	20.6667	19.3333	26.6667	22.3333																								19.8483	-44.6271	21.3654	-12.0101	-8.97598	-16.5613	-18.8369	-5.94185	-12.0101	21.3654	1.64349
	Store @ 4°C	60	26	23.1667	19.3333	24.8333	18	17.6667	18.3333	19.6667	28.3333	27.6667	30	21.5																							18.3312	5.43616	-12.0101	13.0215	-18.0784	-19.5954	-16.5613	-10.493	28.9507	25.9166	36.536	-2.14918
	Image @ 37°C	120	24	27	21	18.8333	22.5	22.3333	21.3333	24.6667	19.3333	16.6667	25.6667	27.6667																							9.22882	22.8824	-4.42478	-14.2857	2.40202	1.64349	-2.90771	12.263	-12.0101	-24.1466	16.8142	25.9166
		360													20.8333	20	28	20	17.6667	17.8333	27.6667	26.5	28.8333	23													-5.18331	-8.97598	27.4336	-8.97598	-19.5954	-18.8369	25.9166	20.6068	31.2263	4.67762
		720													19.6667	16.3333	25.1667	21	20.6667	20.3333	20	22.6667	13.6667	23.6667	19.6667												-10.493	-25.6637	14.5386	-4.42478	-5.94185	-7.45891	-8.97598	3.16056	-37.8003	7.71176	-10.493
			220629-30										221122										240321-22
	L15 + FBS	0	18.3333	25.5	16.3333	25.6667	25	22.3333	21.6667	20.8333	16.5												31.5	34	28.6667	29.6667
	harvest @ 4°C	30	26.3333	27.3333	21.6667	30.6667	31	31.6667	25.3333	29.3333	20.5	9.33333											26	26	29	26.6667											8.33333	12.4473	-10.865	26.1603	27.5316	30.2743	4.21941	20.6751	-15.6646	-61.6034	6.96203	6.96203	19.3038
	Store @ rt	60	31.6667	20.6667	23.3333	28.3333	28.3333	27	21.6667	17.6667	32.25	28.5											31	22.6667	35.3333	26.6667											30.2743	-14.9789	-4.00844	16.5612	16.5612	11.0759	-10.865	-27.3207	32.6741	17.2468	27.5316	-6.75105	45.3586
	Image @ 37°C	120	28.6667	27.8333	34.6667	28.5	26.3333	31.3333	29.3333	29.3333	26.3333	30.6667											34.6667	31	29	33.3333											17.9325	14.5042	42.616	17.2468	8.33333	28.903	20.6751	20.6751	8.33333	26.1603	42.616	27.5316	19.3038
		360											30	32.6667	32	31	29.6667	30.5	26.3333	18.3333	44	32.3333															23.4177	34.3882	31.6456	27.5316	22.0464	25.4747	8.33333	-24.5781	81.0127	33.0169
		720											20.6667	21	31.6667	32	29	32.6667	34.6667	36.3333	31.6667	26.3333															-14.9789	-13.6076	30.2743	31.6456	19.3038	34.3882	42.616	49.4726	30.2743	8.33333
			220615-16				H2O2 Sham animals
	L15 + FBS	0	25.6667	15.3333	23	21	20.6	11	21.3	25.8	22.3	23.5	28.3	24	25.3	23	14	21	24.4	23.3	20.3	24.8	24.5	24	24.75	20.75
	harvest @ 4°C	30	25.3333	25.5	23	23.8333	22.5	16.3	12.8	14	26	20.5	19	19.3	27.4	19	20.3	24.4	21.8	25.8	22.3	29.8	14.5	15.3	14.75	13.5	15.75
	Store @ 37	60	26	26.5	33.6667	28	23.8	28	28.8	14.8	13.8	15	21	24.3	18	13.3	25	19.6	20	16.5	19.25	17.25	16.75
	Image @ 37°C	120	19.3333	31.3333	21	15.3333	26	21.3	29.9	22.3	27.3	28.3	26.5	28.5	29.1	23.8	19.9	18.3	19.3	15.8	21.25	18.5
		360					8.4	11.2	16.4	17.2	16.2	26.6	28.5	20.4	29.2857
		720					16.875	12.6	13	21.3333	15.8	27.8	31.5	25	21.5	26.8	27.2857
			221020											221124
	M199-nothing	0	19.6667	19.6667	23.3333	22.5	28.6667	19.3333	21	20.6667	24	27.6667
	harvest @ 4°C	30	23	23.6667	25.6667	23.6667	28	29.3333	24.3333	25	31	20.5																									1.54525	4.48859	13.3186	4.48859	23.6203	29.507	7.43194	10.3753	36.8653	-9.49227
	Store @ 4°C	60	22	24	17.3333	22	11.3333	23.6667	15.3333	25.3333	26	24.6667	18																								-2.86976	5.96026	-23.4731	-2.86976	-49.9632	4.48859	-32.3032	11.8469	14.7903	8.90361	-20.5298
	Image @ 37°C	120	22.5	21.6667	23.6667	26	22.6667	24	24.6667	23.3333	22	22.8333																									-0.662252	-4.34143	4.48859	14.7903	0.0735835	5.96026	8.90361	3.01692	-2.86976	0.809419
		360												28.6667	22.8333	24.6667	26.6667	23.3333	27.8333	27.6667	31.3333	25.3333	31	22.3333	29												26.5636	0.809419	8.90361	17.7336	3.01692	22.8845	22.1486	38.337	11.8469	36.8653	-1.39809	28.0353
		720												25.8333	33.3333	38.3333	35.3333	33	34	21.6667	24	18	22	20.6667	23.6667												14.0545	47.167	69.2421	55.9971	45.6954	50.1104	-4.34143	5.96026	-20.5298	-2.86976	-8.75644	4.48859
			220222-24 / 220302												221124
	M199-nothing	0	18.5	20.3333	26.3333	24	20.3333	22.6667	15.5	15.5	26.1667	23.3333	22.6667	21.5
	harvest @ 4°C	30	12	15.3333	31.1667	22.6667	25.3333	22	22	24.6667	19.6667	28.6667																									-43.9325	-28.3582	45.6197	5.90526	18.3647	2.7904	2.7904	15.2498	-8.11162	33.939
	Store @ rt	60	24.8333	29	23.3333	22.3333	24	28.3333	28.6667	28	21	24.3333	16.6667																								16.0286	35.4964	9.02012	4.34783	12.135	32.3816	33.939	30.8241	-1.88189	13.6924	-22.1285
	Image @ 37°C	120	24.3333	29	28.3333	26.3333	25	30.3333	19	27.6667	29.6667	23.1667	24.3333	31																							13.6924	35.4964	32.3816	23.037	16.8073	41.7262	-11.2265	29.2667	38.6113	8.2414	13.6924	44.841
		360													22.6667	36	34.6667	37	41	31.6667	33	37.6667	24.3333	23.6667													5.90526	68.2025	61.9727	72.8748	91.5639	47.9559	54.1856	75.9896	13.6924	10.5775
		720													35.3333	28	30.6667	29.3333	38.3333	32.6667	43.6667	35.3333	42.6667	40.6667													65.0876	30.8241	43.2836	37.0539	79.1045	52.6282	104.023	65.0876	99.3511	90.0065
			231109											231116-17
	M199 no bicab/fb	0												23	15.3333	21.3333	23.8333	29.6667	25.3333	24.6667	27.3333	23.3333	24.6667
	harvest @ 4°C	30												20.3333	25	30.3333	27	22.3333	22.3333	24	27	28	24														-14.7449	4.8218	27.1838	13.2075	-6.35919	-6.35919	0.628931	13.2075	17.4004	0.628931
	Store @ 4°C	60												22.6667	17.6667	28.6667	23.6667	26.8333	28.6667	25	16.1667	25	22.6667														-4.96157	-25.9259	20.1957	-0.768693	12.5087	20.1957	4.8218	-32.2152	4.8218	-4.96157
	Image @ 37°C	120												20.6667	27.1667	24.1667	21.3333	28.6667	28	20.3333	18	20	20.6667														-13.3473	13.9064	1.32774	-10.5521	20.1957	17.4004	-14.7449	-24.5283	-16.1426	-13.3473
		360	23.6667	24.3333	20.3333	23	27	16	24	20.6667	21	20.3333																									-0.768693	2.02655	-14.7449	-3.56394	13.2075	-32.914	0.628931	-13.3473	-11.9497	-14.7449
		720	14	15	24.3333	29.6667	22.6667	15.6667	25	24	27.6667	25.3333	20.6667																								-41.2998	-37.1069	2.02655	24.3885	-4.96157	-34.3117	4.8218	0.628931	16.0028	6.21943	-13.3473
			231102-03											231109
	M199 no bicab/fb	0	34	23.8333	30.3333	27.3333	29	30.1667	31.3333	20	27.3333	26
	harvest @ 4°C	30	28.6667	28.3333	32.6667	41	36.8333	35.6667	27.6667	35	31.3333	23																									2.6253	1.43198	16.9451	46.778	31.8616	27.685	-0.954654	25.2983	12.1718	-17.6611
	Store @ rt	60	35	28.3333	34.6667	25.6667	34.8333	30.6667	25.3333	32	39.6667	31.6667	28.3333																								25.2983	1.43198	24.105	-8.11456	24.7017	9.7852	-9.30788	14.5585	42.0048	13.3652	1.43198
	Image @ 37°C	120	38.6667	32.5	28	30.6667	39	31.8333	39	43.3333	44.5	24.3333																									38.4248	16.3484	0.238663	9.7852	39.6181	13.9618	39.6181	55.1313	59.3079	-12.8878
		360												26	26	24.6667	24.6667	28.3333	31.1667	26.3333	35	25	26.3333														-6.92124	-6.92124	-11.6945	-11.6945	1.43198	11.5752	-5.72792	25.2983	-10.5012	-5.72792
		720												28.3333	27.3333	33.3333	28.6667	29.3333	29.6667	28.6667	27.3333	27.6667	29														1.43198	-2.14797	19.3317	2.6253	5.01193	6.20525	2.6253	-2.14797	-0.954654	3.81862
			231213										240118
	M199 + FBS no bicab	0	29	21	26	21.6667	34	28.3333	26.5	19.3333	29.6667	26.3333
	harvest @ 4°C	30	26.3333	22.3333	27.5	27	28.5	24.6667	25.3333	22.3333	26	27.6667																									0.572884	-14.704	5.02864	3.11903	8.84787	-5.79249	-3.24634	-14.704	-0.700191	5.66518
	Store @ 4°C	60	28.3333	26	31.3333	23	25.5	23.3333	28.3333	27.3333	25.6667	14.6667																									8.21133	-0.700191	19.669	-12.1579	-2.6098	-10.8848	8.21133	4.39211	-1.97327	-43.9847
	Image @ 37°C	120	30	26	28	22	23.3333	29.3333	25.3333	23.3333	18.6667	18.8333																									14.5767	-0.700191	6.93826	-15.9771	-10.8848	12.0306	-3.24634	-10.8848	-28.7078	-28.0713
		360											26.6667	22.3333	28.3333	16.3333	18.8333	19.3333	27.6667	25	32.3333	23															1.84596	-14.704	8.21133	-37.6194	-28.0713	-26.1617	5.66518	-4.51941	23.4882	-12.1579
		720											24.1667	24	29.6667	25	17	21	27.3333	27.3333	18	27															-7.7021	-8.33864	13.3036	-4.51941	-35.0732	-19.7963	4.39211	4.39211	-31.254	3.11903
			231206-7										240118
	M199 + FBS no bicab	0	22	22.6667	24	31.3333	25	20.6667	21.6667	20.6667	25
	harvest @ 4°C	30	30	20	27.3333	32.6667	27	24	30	26.6667	22.6667	29																									26.7606	-15.493	15.493	38.0282	14.0845	1.40845	26.7606	12.6761	-4.22535	22.5352
	Store @ rt	60	25.6414	29.6667	27.5	32.3333	24.3333	25.5	24.6667	17	26.3333	26.8333																									8.34386	25.3521	16.1972	36.6197	2.8169	7.74648	4.22535	-28.169	11.2676	13.3803
	Image @ 37°C	120	29.3333	30.3333	30.6667	35.3333	30	22.3333	28.6667	35	32.3333	30.6667																									23.9437	28.169	29.5775	49.2958	26.7606	-5.6338	21.1268	47.8873	36.6197	29.5775
		360											39.3333	36.6667	25.6667	34.3333	33	27.3333	37.3333	26.3333	41.6667	28.1667															66.1972	54.9296	8.4507	45.0704	39.4366	15.493	57.7465	11.2676	76.0563	19.0141
		720											38	34	34.6667	34.3333	32	27.3333	29.8333	33	37	30	31.3333														60.5634	43.662	46.4789	45.0704	35.2113	15.493	26.0563	39.4366	56.338	26.7606	32.3944
			221021										221128
	DMEM-nothing	0	20.6667	21.5	23.3333	21.1667	21	33.6667	18	23.6667	19.3333
	harvest @ 4°C	30	21.3333	23	26	26.6667	25	27.3333	25.6667	19	13.3333																										-5.10708	2.30643	15.6507	18.6161	11.2026	21.5815	14.168	-15.486	-40.6919
	Store @ 4°C	60	23.6667	23	27	15.3333	34	16.6667	29.6667	23.3333	28.6667	27.3333																									5.27183	2.30643	20.0988	-31.7957	51.2356	-25.8649	31.9605	3.78913	27.5124	21.5815
	Image @ 37°C	120	28.6667	24.6667	24.6667	18	26.6667	16	21.8333	24.8333	27.3333	25																									27.5124	9.71993	9.71993	-19.9341	18.6161	-28.8303	-2.88303	10.4613	21.5815	11.2026
		360											21	41	21.6667	23	30.3333	24.6667	26.3333	25.6667	30	36.3333	28.3333														-6.58979	82.3723	-3.62438	2.30643	34.9259	9.71993	17.1334	14.168	33.4432	61.6145	26.0297
		720											34.75	35	19.5	27.3333	29.1667	34.6667	25.6667	24.6667	29.3333	26															54.5717	55.6837	-13.2619	21.5815	29.7364	54.201	14.168	9.71993	30.4778	15.6507
			221128											230222-24
	DMEM-nothing	0												23	27	21.5	21	30.3333	24.3333	24.1667	30.6667	26.6667
	harvest @ 4°C	30												25.8333	21.3333	30.3333	26.3333	36.6667	31.6667	26.6667	32.6667	30.3333															1.67638	-16.035	19.3878	3.64431	44.3149	24.6356	4.95627	28.5714	19.3878
	Store @ rt	60												33.3333	26	29.3333	24.3333	29.3333	29	34.3333	30.3333																31.1953	2.33236	15.4519	-4.22741	15.4519	14.1399	35.1312	19.3878
	Image @ 37°C	120												29	28	39.8333	34.8333	37.3333	27.6667	25.1667	32.6667	29	28.3333														14.1399	10.2041	56.7784	37.0991	46.9388	8.89213	-0.947522	28.5714	14.1399	11.516
		360	24.6667	14.8333	42	27.3333	30.1667	20.1667	25.6667	24	29.3333	28.6667																									-2.91545	-41.6181	65.3061	7.58017	18.7318	-20.6268	1.02041	-5.53936	15.4519	12.828
		720	22	22	22	30.6667	33	27	30.3333	23	24	41.3333	37																								-13.4111	-13.4111	-13.4111	20.6997	29.8834	6.26822	19.3878	-9.47522	-5.53936	62.6822	45.6268
			240426
	DMEM+FBS	0												27.3333	27.6667	26	24.6667	33.6667	32	26	26	29.6667	32.6667
	harvest @ 4°C	30												25.6667	26.6667	26.3333	23	28	18.3333	28.6667	21	29	29														-10.1517	-6.65111	-7.81797	-19.4866	-1.98366	-35.8226	0.350058	-26.4877	1.51692	1.51692
	Store @ 4°C	60												20.3333	31.6667	23.5	24.6667	33.3333	28.6667	26.3333	27.5	23.3333	26.6667														-28.8215	10.8518	-17.7363	-13.6523	16.6861	0.350058	-7.81797	-3.73396	-18.3197	-6.65111
	Image @ 37°C	120												19.3333	25	22.3333	26	24.3333	22.6667	27.3333	30	25.3333	31.1667														-32.3221	-12.4854	-21.8203	-8.98483	-14.8191	-20.6534	-4.31739	5.0175	-11.3186	9.10152
		360	18	28	24.6667	19.5	26.6667	22.6667	26.3333	25	32	25																									-36.9895	-1.98366	-13.6523	-31.7386	-6.65111	-20.6534	-7.81797	-12.4854	12.0187	-12.4854
		720	24.6667	18	19.3333	26.6667	32	28.6667	25.1667	23.3333	27.6667	23	21.6667																								-13.6523	-36.9895	-32.3221	-6.65111	12.0187	0.350058	-11.902	-18.3197	-3.15053	-19.4866	-24.154
			240418											240426
	DMEM+FBS	0	26.3333	20.3333	22.6667	20.6667	22.6667	21	24	21.3333	27	21.6667
	harvest @ 4°C	30	23.6667	24	26.6667	21.6667	25.6667	24.6667	27	22.3333	25.3333	22.3333																									3.95315	5.41728	17.1303	-4.83163	12.7379	8.34553	18.5944	-1.90337	11.2738	-1.90337
	Store @ rt	60	22	24.5	27.3333	25.6667	24.6667	27	23.6667	21.3333	29.3333	23																									-3.3675	7.61347	20.0586	12.7379	8.34553	18.5944	3.95315	-6.29575	28.8433	1.02489
	Image @ 37°C	120	22.3333	23.6667	27.5	18.6667	27.3333	27.3333	29.3333	27	22.3333	31.6667	31.6667																								-1.90337	3.95315	20.7906	-18.0088	20.0586	20.0586	28.8433	18.5944	-1.90337	39.0922	39.0922
		360												25	25	28.3333	23	25	27.5	38.5	34	30.6667	30.6667														9.80966	9.80966	24.451	1.02489	9.80966	20.7906	69.1069	49.3411	34.6999	34.6999
		720												34.3333	24	26	22	33	31.6667	28.3333	28.3333	32															50.8053	5.41728	14.202	-3.3675	44.9488	39.0922	24.451	24.451	40.5564
			231025										231026-27
	MEM-nothing	0											23.3333	25	23.3333	24.6667	22.6667	35.6667	26.6667	17.3333	31.3333	25.3333
	harvest @ 4°C	30											22	20.3333	21.3333	8.83333	23.3333	27.6667	24.1667	21.5	24	29.3333															-13.8381	-20.3655	-16.4491	-65.4047	-8.61619	8.35509	-5.35248	-15.7963	-6.00522	14.8825
	Store @ 4°C	60											22.6667	26.8333	22	26.3333	22.8333	35.6667	32	21.3333	14.3333	22.8333	23														-11.2272	5.09138	-13.8381	3.13316	-10.5744	39.6867	25.3264	-16.4491	-43.8642	-10.5744	-9.92167
	Image @ 37°C	120											23.1667	17.3333	21	25	29	27.6667	28.5	24.3333	19.3333	23															-9.26893	-32.1149	-17.7546	-2.08877	13.577	8.35509	11.6188	-4.69974	-24.282	-9.92167
		360	24.3333	25	29.3333	27.3333	37	35.3333	33.1667	42.6667	21	23.6667																									-4.69974	-2.08877	14.8825	7.04961	44.9086	38.3812	29.8956	67.1018	-17.7546	-7.3107
		720	15.6667	32.5	23	26.3333	28.6667	31.6667	19.3333	21.3333	24.6667	26.1667																									-38.6423	27.2846	-9.92167	3.13316	12.2715	24.0209	-24.282	-16.4491	-3.39426
			231024										231025
	MEM-nothing	0	30.3333	26.6667	27	26.3333	32	27.3333	30.6667	28.3333	25.5	25.3333
	harvest @ 4°C	30	36.6667	28.1667	25.3333	26.6667	30	26.6667	31.6667	28.6667	32.6667	28.6667																									31.1866	0.775194	-9.36196	-4.59153	7.33453	-4.59153	13.2976	2.5641	16.8754	2.5641
	Store @ rt	60	38.8333	24.6667	28.6667	24.6667	33.6667	21.6667	39.6667	31.3333	31.6667	26.8333																									38.9386	-11.7472	2.5641	-11.7472	20.4532	-22.4806	41.9201	12.1049	13.2976	-3.99523
	Image @ 37°C	120	34.3333	31.3333	31.6667	22	33.3333	28	27.6667	26.5	28	34																									22.8384	12.1049	13.2976	-21.288	19.2606	0.178891	-1.01371	-5.18784	0.178891	21.6458
		360											33.3333	29.6667	32.3333	33.6667	26	35.3333	32.6667	24.6667	39.3333	37.3333															19.2606	6.14192	15.6828	20.4532	-6.97674	26.4162	16.8754	-11.7472	40.7275	33.5719
		720											31	32.6667	25.3333	30.6667	38	35.6667	31.1667	36.3333	39	26.3333															10.9123	16.8754	-9.36196	9.71974	35.9571	27.6088	11.5086	29.994	39.5349	-5.78414
			240208										240220-21
	MEM+FBS	0											32	22	19.6667	27.6667	23	26.6667	31.3333	27.6667	27.3333	20.6667
	harvest @ 4°C	30											30	28.3333	23.3333	21	24.6667	24.6667	27.3333	23	23	25.3333	24														16.2791	9.81912	-9.56072	-18.6047	-4.39276	-4.39276	5.94315	-10.8527	-10.8527	-1.80879	-6.97674
	Store @ 4°C	60											28.6667	26.3333	26.6667	19	20	21.6667	26.6667	25.6667	26.3333	25.3333	25.6667														11.1111	2.06718	3.35917	-26.3566	-22.4806	-16.0207	3.35917	-0.516796	2.06718	-1.80879	-0.516796
	Image @ 37°C	120											23.3333	29.6667	28.6667	28	19	27	27.3333	25.6667	23	22.3333	25.5	29.3333													-9.56072	14.9871	11.1111	8.52713	-26.3566	4.65116	5.94315	-0.516796	-10.8527	-13.4367	-1.16279	13.6951
		360	26.3333	31	24	21.3333	25.6667	29.3333	24.3333	24.6667	37	26																									2.06718	20.155	-6.97674	-17.3127	-0.516796	13.6951	-5.68475	-4.39276	43.4109	0.775194
		720	28	25.3333	24.3333	27	23.5	30.3333	26	26.3333	25	17.3333																									8.52713	-1.80879	-5.68475	4.65116	-8.91473	17.5711	0.775194	2.06718	-3.10078	-32.8165
			240208									240214
	MEM+FBS	0										27.6667	11.3333	23.6667	28.6667	26.6667	26	30.3333	29.1667	27.3333
	harvest @ 4°C	30										19.6667	23.3333	34.3333	28	26.6667	33.6667	26.3333	28																		-23.3213	-9.02527	33.8628	9.16968	3.97112	31.2635	2.67148	9.16968
	Store @ rt	60										26	31.6667	27.3333	31	31	26	23.3333	23.3333	27.8333																	1.37184	23.4657	6.5704	20.8664	20.8664	1.37184	-9.02527	-9.02527	8.51986
	Image @ 37°C	120										32.3333	25.3333	32.6667	34.3333	33.3333	32	22.6667	18.3333																		26.065	-1.22744	27.3646	33.8628	29.9639	24.7653	-11.6245	-28.5199
		360	34.3333	28.6667	31.8333	37.6667	27.6667	35.3333	27.3333	36	35.3333																										33.8628	11.769	24.1155	46.8592	7.87004	37.7617	6.5704	40.361	37.7617
		720	40.3333	35.6667	34.3333	32.6667	36.6667	38.3333	36	41	14																										57.2563	39.0614	33.8628	27.3646	42.9603	49.4585	40.361	59.8556	-45.4152
[truncated: 4 more columns]

## Sheet: #motile
		time
			220727-28														221117
	Saline-nothing	0	19	12	9	11	16	12	16	9	9
	harvest @ 4°C	30	15	11	5	8	11	4	13	14	6	8																										19.469	-12.3894	-60.177	-36.2832	-12.3894	-68.1416	3.53982	11.5044	-52.2124	-36.2832
	Store @ 4°C	60	5	4	3	3	1	2	1	9	8	2	10	1	10																							-60.177	-68.1416	-76.1062	-76.1062	-92.0354	-84.0708	-92.0354	-28.3186	-36.2832	-84.0708	-20.354	-92.0354
	Image @ 37°C	120	0	0	8	0	1	0	8	0	1	1	10	2	3	11																						-100	-100	-36.2832	-100	-92.0354	-100	-36.2832	-100	-92.0354	-92.0354	-20.354	-84.0708
		360															4	7	5	1	11	0	3	4	8	2	2	7										-68.1416	-44.2478	-60.177	-92.0354	-12.3894	-100	-76.1062	-68.1416	-36.2832	-84.0708	-84.0708	-44.2478
		720															1	8	2		7	1	3	7	7													-92.0354	-36.2832	-84.0708		-44.2478	-92.0354	-76.1062	-44.2478	-44.2478
			220105								220119-20							220216-17		211208-9							221117
	Saline-nothing	0									10	9	24	11	10	13		15	17	8	19	23	17	12	16	18
	harvest @ 4°C	30	19	14	10	11	11				13	12	9	8	8	9	8	15	16																			28.3784	-5.40541	-32.4324	-25.6757	-25.6757				-12.1622	-18.9189	-39.1892	-45.9459
	Store @ rt	60	8	2	5	9	12				9	5	4	9	6			15	18																			-45.9459	-86.4865	-66.2162	-39.1892	-18.9189				-39.1892	-66.2162	-72.973	-39.1892
	Image @ 37°C	120	1	4	2	3	5	8	13	7	2	9	8	4	4	15		18	19																			-93.2432	-72.973	-86.4865	-79.7297	-66.2162	-45.9459	-12.1622	-52.7027	-86.4865	-39.1892	-45.9459	-72.973
		360																									2	0	2	3	7	3	2	7	8	8	1	-86.4865	-100	-86.4865	-79.7297	-52.7027	-79.7297	-86.4865	-52.7027	-45.9459	-45.9459	-93.2432
		720																									0	0	2	0	0	4	2					-100	-100	-86.4865	-100	-100	-72.973	-86.4865
			221028												221129
	HBSS-nothing-no bicarb	0	24	23	27	20	25	15	24	18	15	18
	harvest @ 4°C	30	18	11	18	23	24	16	17	23	25	18	22																									-13.8756	-47.3684	-13.8756	10.0478	14.8325	-23.445	-18.6603	10.0478	19.6172	-13.8756	5.26316
	Store @ 4°C	60	23	22	22	19	19	22	19	22	14	18																										10.0478	5.26316	5.26316	-9.09091	-9.09091	5.26316	-9.09091	5.26316	-33.0144	-13.8756
	Image @ 37°C	120	17	22	23	19	26	21	15	18	20	19	14	21																								-18.6603	5.26316	10.0478	-9.09091	24.4019	0.478469	-28.2297	-13.8756	-4.30622	-9.09091	-33.0144	0.478469
		360													16	10	19	16	24	24	15	16	21	20	21													-23.445	-52.1531	-9.09091	-23.445	14.8325	14.8325	-28.2297	-23.445	0.478469	-4.30622	0.478469
		720													14	13	16	19	20	20	16	17	21	17	9													-33.0144	-37.799	-23.445	-9.09091	-4.30622	-4.30622	-23.445	-18.6603	0.478469	-18.6603	-56.9378
			221027										221129
	HBSS-nothing-no bicarb	0	18	20	15	23	24	26	23	24	16
	harvest @ 4°C	30	25	23	22	21	18	25	19	17	13	9																										19.0476	9.52381	4.7619	0	-14.2857	19.0476	-9.52381	-19.0476	-38.0952	-57.1429
	Store @ rt	60	20	17	20	14	22	18	21	19	8																											-4.7619	-19.0476	-4.7619	-33.3333	4.7619	-14.2857	0	-9.52381	-61.9048
	Image @ 37°C	120	27	24	22	18	26	26	21	19	21	17																										28.5714	14.2857	4.7619	-14.2857	23.8095	23.8095	0	-9.52381	0	-19.0476
		360											14	28	24	21	17	24	23	21	23	24	23															-33.3333	33.3333	14.2857	0	-19.0476	14.2857	9.52381	0	9.52381	14.2857	9.52381
		720											17	20	24	25	26	22	25	20	20	27	25	19														-19.0476	-4.7619	14.2857	19.0476	23.8095	4.7619	19.0476	-4.7619	-4.7619	28.5714	19.0476	-9.52381
			240229										240313										240321-22
	HBSS+FBS-no bicarb	0											17	22	21	19	23	17	23	22	22	22	22	20	26	23	23	19
	harvest @ 4°C	30											21	20	21	22	22	23	22	23	14	18	23	22	24	20	16											-1.46628	-6.15836	-1.46628	3.22581	3.22581	7.91789	3.22581	7.91789	-34.3109	-15.5425	7.91789	3.22581
	Store @ 4°C	60											21	18	21	20	19	19	17	13	18	18	24	24	22	21	18	17										-1.46628	-15.5425	-1.46628	-6.15836	-10.8504	-10.8504	-20.2346	-39.0029	-15.5425	-15.5425	12.61	12.61
	Image @ 37°C	120											18	18	18	18	18	17	20	18	21	20	15	22	18	20	19	18										-15.5425	-15.5425	-15.5425	-15.5425	-15.5425	-20.2346	-6.15836	-15.5425	-1.46628	-6.15836	-29.6188	3.22581
		360	11	21	25	19	20	18	22	22	21	24																										-48.3871	-1.46628	17.3021	-10.8504	-6.15836	-15.5425	3.22581	3.22581	-1.46628	12.61
		720	23	24	18	19	19	18	17	18	19																											7.91789	12.61	-15.5425	-10.8504	-10.8504	-15.5425	-20.2346	-15.5425	-10.8504
			240229										240305-07
	HBSS+FBS-no bicarb	0											19	20	17	21	21	20	20	19	19	20
	harvest @ 4°C	30											22	23	20	21	21	23	22	21	22	22																12.2449	17.3469	2.04082	7.14286	7.14286	17.3469	12.2449	7.14286	12.2449	12.2449
	Store @ rt	60											17	18	24	22	23	23	24	22	24	25																-13.2653	-8.16327	22.449	12.2449	17.3469	17.3469	22.449	12.2449	22.449	27.551
	Image @ 37°C	120											24	24	25	24	25	25	19	24	20	20																22.449	22.449	27.551	22.449	27.551	27.551	-3.06122	22.449	2.04082	2.04082
		360	23	22	23	22	22	23	25	24	23	23																										17.3469	12.2449	17.3469	12.2449	12.2449	17.3469	27.551	22.449	17.3469	17.3469
		720	23	22	23	23	18	18	26	24	26	25																										17.3469	12.2449	17.3469	17.3469	-8.16327	-8.16327	32.6531	22.449	32.6531	27.551
			220105				220112-13				220216-17
	HBSS-FBS+bicard no co2	0	21	14	15		19	23	24		26	21	17
	harvest @ 4°C	30	20	13	20	17	14	9	23	20	18	22	25	25
	Store @ rt	60	13	18	16	25	21	12	19	9	16	16	17	21
	Image @ 37°C	120	21	15	19	22	17	18	20	16	25	21	19	20
			220715											221123
	RPMI-nothing	0	16	15	23	22	6	24	24	22	21
	harvest @ 4°C	30	20	16	21	15	14	23	16	12	18	16																										4.04624	-16.763	9.24855	-21.9653	-27.1676	19.6532	-16.763	-37.5723	-6.35838	-16.763
	Store @ 4°C	60	22	20	19	17	22	18	18	11	21	18																										14.4509	4.04624	-1.15607	-11.5607	14.4509	-6.35838	-6.35838	-42.7746	9.24855	-6.35838
	Image @ 37°C	120	21	13	18	20	12	20	13	12	18																											9.24855	-32.3699	-6.35838	4.04624	-37.5723	4.04624	-32.3699	-37.5723	-6.35838
		360												19	23	19	17	18	22	19	16	18																-1.15607	19.6532	-1.15607	-11.5607	-6.35838	14.4509	-1.15607	-16.763	-6.35838
		720												20	20	13	17	17	12	18	24	23																4.04624	4.04624	-32.3699	-11.5607	-11.5607	-37.5723	-6.35838	24.8555	19.6532
			220119-20				220202-04		220209-10					220216-17		221123
	RPMI-nothing	0	7	21	16		23	25	19	20	17	12		19	22
	harvest @ 4°C	30	18	15	17	16	26	24	17	16	24	14	17	19	23																							-1.49254	-17.9104	-6.96517	-12.4378	42.2886	31.3433	-6.96517	-12.4378	31.3433	-23.3831	-6.96517	3.9801
	Store @ rt	60	24	19	20	14	23	27	5	13	16	22		16	18																							31.3433	3.9801	9.45274	-23.3831	25.8706	47.7612	-72.6368	-28.8557	-12.4378	20.398		-12.4378
	Image @ 37°C	120	23	20	24	25	24	22	25	26	22	20		19	23																							25.8706	9.45274	31.3433	36.8159	31.3433	20.398	36.8159	42.2886	20.398	9.45274		3.9801
		360														18	24	22	16	22	18	20	23	25	26													-1.49254	31.3433	20.398	-12.4378	20.398	-1.49254	9.45274	25.8706	36.8159	42.2886
		720														18	19	12	8	23	19	15	12	24	15													-1.49254	3.9801	-34.3284	-56.2189	25.8706	3.9801	-17.9104	-34.3284	31.3433	-17.9104
			230629-30										230721
	RPMI+FBS	0	23	24	22	25	23	22	26	21	23	21
	harvest @ 4°C	30	23	20	23	19	25	23	23	23	22	19																										0	-13.0435	0	-17.3913	8.69565	0	0	0	-4.34783	-17.3913
	Store @ 4°C	60	23	18	24	17	23	22	20	20	19	20																										0	-21.7391	4.34783	-26.087	0	-4.34783	-13.0435	-13.0435	-17.3913	-13.0435
	Image @ 37°C	120	19	21	21	20	24	23	22	18	23	20																										-17.3913	-8.69565	-8.69565	-13.0435	4.34783	0	-4.34783	-21.7391	0	-13.0435
		360											19	23	23	16	18	20	20	20	24																	-17.3913	0	0	-30.4348	-21.7391	-13.0435	-13.0435	-13.0435	4.34783
		720											20	18	14	18	23	23	19	15																		-13.0435	-21.7391	-39.1304	-21.7391	0	0	-17.3913	-34.7826
			230621-23										230721
	RPMI+FBS	0	21	23	21	23	23	24	26	27	27	21
	harvest @ 4°C	30	16	27	19	18	21	24	23	25	24	24																										-32.2034	14.4068	-19.4915	-23.7288	-11.0169	1.69492	-2.54237	5.9322	1.69492	1.69492
	Store @ rt	60	22	21	24	26	16	15	24	15	24	24																										-6.77966	-11.0169	1.69492	10.1695	-32.2034	-36.4407	1.69492	-36.4407	1.69492	1.69492
	Image @ 37°C	120	21	22	25	26	8	24	24	23	23	20																										-11.0169	-6.77966	5.9322	10.1695	-66.1017	1.69492	1.69492	-2.54237	-2.54237	-15.2542
		360											18	26	23	26	13	15	23	19	16																	-23.7288	10.1695	-2.54237	10.1695	-44.9153	-36.4407	-2.54237	-19.4915	-32.2034
		720											14	16	22	21	22	16	23	14																		-40.678	-32.2034	-6.77966	-11.0169	-6.77966	-32.2034	-2.54237	-40.678
			221005-07										221103
	DPBS-nothing	0	21	20	23	20	21	18	19	25	26	22
	harvest @ 4°C	30	26	17	20	17	21	22	24	20	22																											20.9302	-20.9302	-6.97674	-20.9302	-2.32558	2.32558	11.6279	-6.97674	2.32558
	Store @ 4°C	60	18	21	18	20	28	23																														-16.2791	-2.32558	-16.2791	-6.97674	30.2326	6.97674
	Image @ 37°C	120	21	22	20	17	19	18	21	18	22	21																										-2.32558	2.32558	-6.97674	-20.9302	-11.6279	-16.2791	-2.32558	-16.2791	2.32558	-2.32558
		360											17	10	12	21	16	18	19	16																		-20.9302	-53.4884	-44.186	-2.32558	-25.5814	-16.2791	-11.6279	-25.5814
		720											18	9	7	18	18	17	19	14	15																	-16.2791	-58.1395	-67.4419	-16.2791	-16.2791	-20.9302	-11.6279	-34.8837	-30.2326
			220112-13							220209-10							221103
	DPBS-nothing	0	14	13	15	21	6	13	20	20	20	26	13	17
	harvest @ 4°C	30	19	15		9	12			18		19	22	25	20	23																						15.1515	-9.09091	-100	-45.4545	-27.2727	-100	-100	9.09091	-100	15.1515	33.3333	51.5152
	Store @ rt	60	17	14	17	22	14	12		23	24	21	20	19	24																							3.0303	-15.1515	3.0303	33.3333	-15.1515	-27.2727	-100	39.3939	45.4545	27.2727	21.2121	15.1515
	Image @ 37°C	120	19	21	15	13	16	25		24	18	26	25	26	21																							15.1515	27.2727	-9.09091	-21.2121	-3.0303	51.5152	-100	45.4545	9.09091	57.5758	51.5152	57.5758
		360															9	20	22	13	12	23	20	19	21													-45.4545	21.2121	33.3333	-21.2121	-27.2727	39.3939	21.2121	15.1515	27.2727
		720															20	17	10	10	16	16	23	23														21.2121	3.0303	-39.3939	-39.3939	-3.0303	-3.0303	39.3939	39.3939
			230728														231129
	DPBS+FBS	0															24	17	24	25	21	14	17	18	23	20
	harvest @ 4°C	30															21	18	24	23	22	21	26	22	25	23												3.44828	-11.33	18.2266	13.3005	8.37438	3.44828	28.0788	8.37438	23.1527	13.3005
	Store @ 4°C	60															25	24	18	21	23	24	20	21	19	18												23.1527	18.2266	-11.33	3.44828	13.3005	18.2266	-1.47783	3.44828	-6.40394	-11.33
	Image @ 37°C	120															20	20	23	25	23	22	22	21	17	18	17											-1.47783	-1.47783	13.3005	23.1527	13.3005	8.37438	8.37438	3.44828	-16.2562	-11.33	-16.2562
		360	17	20	16	15	13	21	24	23	16	23	18	26	23	25																						-16.2562	-1.47783	-21.1823	-26.1084	-35.9606	3.44828	18.2266	13.3005	-21.1823	13.3005	-11.33	28.0788
		720	13	11	19	7	19	18	18	23	24	19																										-35.9606	-45.8128	-6.40394	-65.5172	-6.40394	-11.33	-11.33	13.3005	18.2266	-6.40394
			230728											231122-23
	DPBS+FBS	0												25	16	23	21	24	20	24	23	17	18
	harvest @ 4°C	30												21	21	26	20	24	25	18	13	23	17															-0.473934	-0.473934	23.2227	-5.21327	13.7441	18.4834	-14.6919	-38.3886	9.00474	-19.4313
	Store @ rt	60												19	22	24	20	23	22	19	20	24	19															-9.95261	4.2654	13.7441	-5.21327	9.00474	4.2654	-9.95261	-5.21327	13.7441	-9.95261
	Image @ 37°C	120												20	23	22	22	18	18	20	24	25	23															-5.21327	9.00474	4.2654	4.2654	-14.6919	-14.6919	-5.21327	13.7441	18.4834	9.00474
		360	21	22	26	22	23	23	22	15	18	25	26																									-0.473934	4.2654	23.2227	4.2654	9.00474	9.00474	4.2654	-28.91	-14.6919	18.4834	23.2227
		720	15	23	24	23	24	26	28	24	23	26	25																									-28.91	9.00474	13.7441	9.00474	13.7441	23.2227	32.7014	13.7441	9.00474	23.2227	18.4834
			230302-3										230316
	DPBS-nothing-w/o CaMg	0	26	21	20	19	21	24	21	15	19	19
	harvest @ 4°C	30	6	8	13	3	18	21	22	17	18	21
	Store @ 4°C	60	8	16	10	15	7	8	17	10	5	6
	Image @ 37°C	120	16	14	6	4	13	17	13	9	21	18
		360											16	20	8	16	16	19	16	10	16	15	19
		720											15	8	21	19	4	11	7	3	11	4	15
			230201-02											230316
	DPBS-nothing-w/o CaMg	0	21	26	8	15	24	21	17	20	18	24
	harvest @ 4°C	30	18	10	15	18	16	23	23	4	18	12	20
	Store @ rt	60	12	17	10	11	8	20	21	22	19
	Image @ 37°C	120	20	16	16	6	17	17	9	6	23	19
		360												22	20	24	22	10	12	18	13
		720												13	9	22	11	19	18	19	19	21
			220622-23							221121													230615							240327-28
	L15-nothing	0	20	21	17	18	19	19															22	21	19	26	24			22	23	24	24
	harvest @ 4°C	30	18	22	16	18	19	21	20														20	19	24	19	23	19		20	24	18	23					-15.3605	3.44828	-24.7649	-15.3605	-10.6583	-1.25392	-5.95611		-5.95611	-10.6583	12.8527	-10.6583
	Store @ 4°C	60	16	14	21	17	22	16															23	21	26	19	20	19	21	18	19	20	18					-24.7649	-34.1693	-1.25392	-20.0627	3.44828	-24.7649			8.15047	-1.25392	22.2571	-10.6583
	Image @ 37°C	120	17	18	19	6	11	20	16														23	20	24	22	23	22		11	17	18	15					-20.0627	-15.3605	-10.6583	-71.7868	-48.2759	-5.95611	-24.7649		8.15047	-5.95611	12.8527	3.44828
		360								17	12	16	16	17	17	16	22	15	15	20	20	15																-20.0627	-43.5737	-24.7649	-24.7649	-20.0627	-20.0627	-24.7649	3.44828	-29.4671	-29.4671	-5.95611	-5.95611
		720								20	17	10	14	18	18	18	12	16	18	18	20																	-5.95611	-20.0627	-52.9781	-34.1693	-15.3605	-15.3605	-15.3605	-43.5737	-24.7649	-15.3605	-15.3605	-5.95611
			220126-27				220202-04									221121												240327-28
	L15-nothing	0	26	22	26	28	23	25	27	24	28	23	24	29														22	21	22	21
	harvest @ 4°C	30	24	21	22	25	18	15	24	24	21																	20	22	21	24							-1.79028	-14.0665	-9.97442	2.30179	-26.3427	-38.6189	-1.79028	-1.79028	-14.0665
	Store @ rt	60	23	23	23	22	24	20	21	20	20	17	17	23														19	15	22	20							-5.88235	-5.88235	-5.88235	-9.97442	-1.79028	-18.1586	-14.0665	-18.1586	-18.1586	-30.4348	-30.4348	-5.88235
	Image @ 37°C	120	22	23			19	23	19	22	23	22	23															20	19	23	21							-9.97442	-5.88235	-100	-100	-22.2506	-5.88235	-22.2506	-9.97442	-5.88235	-9.97442	-5.88235
		360														21	21	16	24	19	20	25	24	20	21													-14.0665	-14.0665	-34.5269	-1.79028	-22.2506	-18.1586	2.30179	-1.79028	-18.1586	-14.0665
		720														18	22	19	22	15	14	15	24	21	18	15	21											-26.3427	-9.97442	-22.2506	-9.97442	-38.6189	-42.711	-38.6189	-1.79028	-14.0665	-26.3427	-38.6189	-14.0665
			220316						220615-16						220324						230217
	L15-nothing	0							17	19	16	20	18	16
	harvest @ 4°C	30	19	24	17	14	18	22	15	22	14	18	16	14	15	14	17	20	16	13
	Store @ 37	60	15	9	14	15	17	14	10	20	11	11	11	10	21	8	18	14	19	13
	Image @ 37°C	120	10	12	12	12	13	15	13	15	13	12	11	9	12	10	17	14	14	15
		360																			6	5	12	7	8	6	12	8	7	6	5
		720																			9	7	12	18	7	10	4	3	5	6
			220622-23				220721-22									221122
	L15 + FBS	0	21	22	18	24	17	21	22	19	12	13	15		12
	harvest @ 4°C	30	11	18	22	22	18	22	20	20	25	21	21	16																								-38.8889	0	22.2222	22.2222	0	22.2222	11.1111	11.1111	38.8889	16.6667	16.6667	-11.1111
	Store @ 4°C	60	20	20	21	24	22	17	22	15	23	18	23	12																								11.1111	11.1111	16.6667	33.3333	22.2222	-5.55556	22.2222	-16.6667	27.7778	0	27.7778	-33.3333
	Image @ 37°C	120	20	11	21	27	19	20	18	13	13	21	25																									11.1111	-38.8889	16.6667	50	5.55556	11.1111	0	-27.7778	-27.7778	16.6667	38.8889
		360														22	23	20	20	17	18	16	20	18	15													22.2222	27.7778	11.1111	11.1111	-5.55556	0	-11.1111	11.1111	0	-16.6667
		720														14	17	16	23	23	16	14	20	21	18	20												-22.2222	-5.55556	-11.1111	27.7778	27.7778	-11.1111	-22.2222	11.1111	16.6667	0	11.1111
			220629-30											221122										240321-22
	L15 + FBS	0	18	22	17	15	14	17	10	17	20													22	21	22	23
	harvest @ 4°C	30	20	20	18	15	3	19	21	21	19	13												21	23	20	21											9.2437	9.2437	-1.68067	-18.0672	-83.6134	3.78151	14.7059	14.7059	3.78151	-28.9916
	Store @ rt	60	20	20	17	19	14	18	21	14	19	16	15											26	23	22	24											9.2437	9.2437	-7.14286	3.78151	-23.5294	-1.68067	14.7059	-23.5294	3.78151	-12.605	-18.0672
	Image @ 37°C	120	21	14	16	15	10	21	19	18	11													22	19	22	19											14.7059	-23.5294	-12.605	-18.0672	-45.3782	14.7059	3.78151	-1.68067	-39.916
		360												22	18	23	22	24	15	17	14	24	25															20.1681	-1.68067	25.6303	20.1681	31.0924	-18.0672	-7.14286	-23.5294	31.0924	36.5546
		720												19	17	24	23	24	23	21	20	18	21															3.78151	-7.14286	31.0924	25.6303	31.0924	25.6303	14.7059	9.2437	-1.68067	14.7059
			220615-16				H2O2 Sham Animals
	L15 + FBS	0	24	25	16	6	14	12	22	8	14	12	9	4	5	8	11	11	11	9	8	11	12	14	12	18
	harvest @ 4°C	30	17	19	20	14	10	6	12	12	14	12	7	7	9	7	6	7	10	13	12	12	12	23	16	13
	Store @ 37	60	11	17	20	18	10	8	10	16	14		13	14	12		8	5		16	13	14		14	21	11
	Image @ 37°C	120	17	21	13	14	10	10	12	6	1	5	12	17			6	7	17	10	13	10		11	17	15
		360
		720
			231109											231116-17
	M199 no bicab/fb	0												19	22	22	23	22	23	24	27	26	25
	harvest @ 4°C	30												21	12	26	23	22	21	19	18	20	24															-9.87124	-48.4979	11.588	-1.28755	-5.5794	-9.87124	-18.4549	-22.7468	-14.1631	3.00429
	Store @ 4°C	60												17	17	12	17	24	24	19	16	22	24															-27.0386	-27.0386	-48.4979	-27.0386	3.00429	3.00429	-18.4549	-31.3305	-5.5794	3.00429
	Image @ 37°C	120												15	20	19	24	25	18	23	20	21	26															-35.6223	-14.1631	-18.4549	3.00429	7.29614	-22.7468	-1.28755	-14.1631	-9.87124	11.588
		360	24	19	14	25	25	19	23	20	22	19																										3.00429	-18.4549	-39.9142	7.29614	7.29614	-18.4549	-1.28755	-14.1631	-5.5794	-18.4549
		720	20	23	23	19	13	13	25	26	17	22	15																									-14.1631	-1.28755	-1.28755	-18.4549	-44.206	-44.206	7.29614	11.588	-27.0386	-5.5794	-35.6223
			231102-03										231109
	M199 no bicab/fb	0	26	26	22	24	23	22	25	24	28	23
	harvest @ 4°C	30	21	23	20	22	23	22	23	23	26	23																										-13.5802	-5.34979	-17.6955	-9.46502	-5.34979	-9.46502	-5.34979	-5.34979	6.99588	-5.34979
	Store @ rt	60	24	23	25	23	20	21	15	21	24	25																										-1.23457	-5.34979	2.88066	-5.34979	-17.6955	-13.5802	-38.2716	-13.5802	-1.23457	2.88066
	Image @ 37°C	120	24	24	22	24	25	23	24	23	26	15																										-1.23457	-1.23457	-9.46502	-1.23457	2.88066	-5.34979	-1.23457	-5.34979	6.99588	-38.2716
		360											28	26	25	26	24	25	26	27	22	23																15.2263	6.99588	2.88066	6.99588	-1.23457	2.88066	6.99588	11.1111	-9.46502	-5.34979
		720											23	26	22	15	22	10	26	27	14	22																-5.34979	6.99588	-9.46502	-38.2716	-9.46502	-58.8477	6.99588	11.1111	-42.3868	-9.46502
			231213										240118
	M199 + FBS no bicab	0	25	20	25	22	19	17	22	22	22	20
	harvest @ 4°C	30	26	23	20	21	24	21	20	20	23	14																										21.4953	7.47664	-6.54206	-1.86916	12.1495	-1.86916	-6.54206	-6.54206	7.47664	-34.5794
	Store @ 4°C	60	21	23	24	20	26	23	22	20	18	18																										-1.86916	7.47664	12.1495	-6.54206	21.4953	7.47664	2.80374	-6.54206	-15.8879	-15.8879
	Image @ 37°C	120	21	23	19	21	22	20	17	22	19	22																										-1.86916	7.47664	-11.215	-1.86916	2.80374	-6.54206	-20.5607	2.80374	-11.215	2.80374
		360											20	22	18	21	18	21	20	24	25	21																-6.54206	2.80374	-15.8879	-1.86916	-15.8879	-1.86916	-6.54206	12.1495	16.8224	-1.86916
		720											20	25	23	25	8	18	20	20	8	7																-6.54206	16.8224	7.47664	16.8224	-62.6168	-15.8879	-6.54206	-6.54206	-62.6168	-67.2897
			231206-7										240118
	M199 + FBS no bicab	0	25	23	23	24	21	23	23	17	15
	harvest @ 4°C	30	22	24	22	21	23	22	22	22	23	23																										2.06186	11.3402	2.06186	-2.57732	6.70103	2.06186	2.06186	2.06186	6.70103	6.70103
	Store @ rt	60	16	22	21	24	24	22	22	24	17	22																										-25.7732	2.06186	-2.57732	11.3402	11.3402	2.06186	2.06186	11.3402	-21.134	2.06186
	Image @ 37°C	120	24	25	21	23	23	20	25	22	25	23																										11.3402	15.9794	-2.57732	6.70103	6.70103	-7.21649	15.9794	2.06186	15.9794	6.70103
		360											23	18	12	22	22	20	21	25	22	23																6.70103	-16.4948	-44.3299	2.06186	2.06186	-7.21649	-2.57732	15.9794	2.06186	6.70103
		720											25	23	24	25	23	20	18	20	19	17																15.9794	6.70103	11.3402	15.9794	6.70103	-7.21649	-16.4948	-7.21649	-11.8557	-21.134
			221021										221128
	DMEM-nothing	0	24	24	20	22	21	23	25	22	24
	harvest @ 4°C	30	17	21	26	22	24	22	23	26	21																											-25.3659	-7.80488	14.1463	-3.41463	5.36585	-3.41463	0.97561	14.1463	-7.80488
	Store @ 4°C	60	22	16	21	18	24	21	25	26	14	18																										-3.41463	-29.7561	-7.80488	-20.9756	5.36585	-7.80488	9.7561	14.1463	-38.5366	-20.9756
	Image @ 37°C	120	22	17	17	11	24	25	20	20	20	21																										-3.41463	-25.3659	-25.3659	-51.7073	5.36585	9.7561	-12.1951	-12.1951	-12.1951	-7.80488
		360											12	20	18	16	22	24	22	24	21	13	26															-47.3171	-12.1951	-20.9756	-29.7561	-3.41463	5.36585	-3.41463	5.36585	-7.80488	-42.9268	14.1463
		720											20	18	10	13	16	20	19	23	24																	-12.1951	-20.9756	-56.0976	-42.9268	-29.7561	-12.1951	-16.5854	0.97561	5.36585
			221128											230222-24
	DMEM-nothing	0												20	18	19	17	19	19	18	25	25
	harvest @ 4°C	30												14	18	19	27	19	15	22	24	22																-30	-10	-5	35	-5	-25	10	20	10
	Store @ rt	60												23	23	21	20	21	22	22	22																	15	15	5	0	5	10	10	10
	Image @ 37°C	120												17	20	22	19	20	18	23	21	23	21															-15	0	10	-5	0	-10	15	5	15	5
		360	20	21	10	19	11	19	23	20	21	23																										0	5	-50	-5	-45	-5	15	0	5	15
		720	21	22	25	24	22	23	24	16	17	24	20																									5	10	25	20	10	15	20	-20	-15	20	0
			240426											240501-02
	DMEM+FBS	0												25	22	21	19	18	22	23	22	25	24
	harvest @ 4°C	30												20	15	20	20	19	22	24	21	19	22															-9.50226	-32.1267	-9.50226	-9.50226	-14.0271	-0.452489	8.59729	-4.97738	-14.0271	-0.452489
	Store @ 4°C	60												20	22	19	20	21	21	22	18	19	24															-9.50226	-0.452489	-14.0271	-9.50226	-4.97738	-4.97738	-0.452489	-18.552	-14.0271	8.59729
	Image @ 37°C	120												15	14	17	17	20	23	23	22	17	20															-32.1267	-36.6516	-23.0769	-23.0769	-9.50226	4.0724	4.0724	-0.452489	-23.0769	-9.50226
		360	19	21	15	19	24	16	24	21	18	20																										-14.0271	-4.97738	-32.1267	-14.0271	8.59729	-27.6018	8.59729	-4.97738	-18.552	-9.50226
		720	14	25	24	21	16	22	21	24	23	17	18																									-36.6516	13.1222	8.59729	-4.97738	-27.6018	-0.452489	-4.97738	8.59729	4.0724	-23.0769	-18.552
			240418											240426
	DMEM+FBS	0	21	20	20	25	26	21	24	18	22	21
	harvest @ 4°C	30	23	21	23	25	25	23	24	21	21	20																										5.50459	-3.66972	5.50459	14.6789	14.6789	5.50459	10.0917	-3.66972	-3.66972	-8.25688
	Store @ rt	60	24	20	26	25	21	22	17	19	25	24																										10.0917	-8.25688	19.2661	14.6789	-3.66972	0.917431	-22.0183	-12.844	14.6789	10.0917
	Image @ 37°C	120	20	18	18	19	20	20	19	23	22	21	26																									-8.25688	-17.4312	-17.4312	-12.844	-8.25688	-8.25688	-12.844	5.50459	0.917431	-3.66972	19.2661
		360												24	21	24	24	24	23	22	23	21	22															10.0917	-3.66972	10.0917	10.0917	10.0917	5.50459	0.917431	5.50459	-3.66972	0.917431
		720												14	16	23	24	25	22	23	23	19	8															-35.7798	-26.6055	5.50459	10.0917	14.6789	0.917431	5.50459	5.50459	-12.844	-63.3028
			231025										231026-27
	MEM-nothing	0											25	22	15	22	16	17	23	21	25	26
	harvest @ 4°C	30											22	23	22	18	9	11	24	21	23	23																8.49057	3.77358	-15.0943	-57.5472	-48.1132	13.2075	-0.943396	8.49057	8.49057
	Store @ 4°C	60											24	23	21	23	11	12	17	26	20	26	19															8.49057	-0.943396	8.49057	-48.1132	-43.3962	-19.8113	22.6415	-5.66038	22.6415	-10.3774
	Image @ 37°C	120											15	16	17	20	18	19	26	20	24	22																-24.5283	-19.8113	-5.66038	-15.0943	-10.3774	22.6415	-5.66038	13.2075	3.77358
		360	20	24	12	13	20	24	19	20	24	25																										-5.66038	13.2075	-43.3962	-38.6792	-5.66038	13.2075	-10.3774	-5.66038	13.2075	17.9245
		720	17	21	15	14	21	16	10	18	25	22																										-19.8113	-0.943396	-29.2453	-33.9623	-0.943396	-24.5283	-52.8302	-15.0943	17.9245	3.77358
			231024										231025
	MEM-nothing	0	25	23	22	26	14	13	23	22	25	19
	harvest @ 4°C	30	25	22	24	22	25	24	21	18	20	23																										17.9245	3.77358	13.2075	3.77358	17.9245	13.2075	-0.943396	-15.0943	-5.66038	8.49057
	Store @ rt	60	26	23	22	23	23	24	19	23	21	17																										22.6415	8.49057	3.77358	8.49057	8.49057	13.2075	-10.3774	8.49057	-0.943396	-19.8113
	Image @ 37°C	120			22	21	19	18	23	22	22	23																												3.77358	-0.943396	-10.3774	-15.0943	8.49057	3.77358	3.77358	8.49057
		360											20	23	25	22	22	23	24	17	26	27																-5.66038	8.49057	17.9245	3.77358	3.77358	8.49057	13.2075	-19.8113	22.6415	27.3585
		720											20	23	22	24	24	27	25	27	24	24																-5.66038	8.49057	3.77358	13.2075	13.2075	27.3585	17.9245	27.3585	13.2075	13.2075
			240208										240220-21
	MEM+FBS	0											23	20	22	21	21	16	24	22	20	17
	harvest @ 4°C	30											21	21	12	19	23	23	18	23	16	24	21															1.94175	1.94175	-41.7476	-7.76699	11.6505	11.6505	-12.6214	11.6505	-22.3301	16.5049	1.94175
	Store @ 4°C	60											18	22	19	17	19	19	19	16	18	20	18															-12.6214	6.79612	-7.76699	-17.4757	-7.76699	-7.76699	-7.76699	-22.3301	-12.6214	-2.91262	-12.6214
	Image @ 37°C	120											13	22	20	22	21	23	20	23	22	20	22	23														-36.8932	6.79612	-2.91262	6.79612	1.94175	11.6505	-2.91262	11.6505	6.79612	-2.91262	6.79612	11.6505
		360	23	22	22	24	22	23	19	23	18	22																										11.6505	6.79612	6.79612	16.5049	6.79612	11.6505	-7.76699	11.6505	-12.6214	6.79612
		720	22	21	19	20	17	19	23	15	19	19																										6.79612	1.94175	-7.76699	-2.91262	-17.4757	-7.76699	11.6505	-27.1845	-7.76699	-7.76699
			240208										240214
	MEM+FBS	0											21	23	23	25	23	26	23	22	20
	harvest @ 4°C	30											23	22	25	26	24	25	24	23																		0.485437	-3.8835	9.2233	13.5922	4.85437	9.2233	4.85437	0.485437
	Store @ rt	60											21	22	21	23	23	19	21	21	23																	-8.25243	-3.8835	-8.25243	0.485437	0.485437	-16.9903	-8.25243	-8.25243	0.485437
	Image @ 37°C	120											25	21	20	19	25	27	25	24																		9.2233	-8.25243	-12.6214	-16.9903	9.2233	17.9612	9.2233	4.85437
		360	24	22	23	25	20	20	21	23	19																											4.85437	-3.8835	0.485437	9.2233	-12.6214	-12.6214	-8.25243	0.485437	-16.9903
		720	24	24	20	23	21	24	19	24	20	21																										4.85437	4.85437	-12.6214	0.485437	-8.25243	4.85437	-16.9903	4.85437	-12.6214	-8.25243
[truncated: 7 more columns]

## Sheet: Flow Vel
		time																																			% change from baseline (mean)
			220727-28
	Saline-nothing	0	30.1289	16.3831	21.479	11.368	14.0322	12.0616	23.114	21.0343	30.3992	48.4262	45.2474	40.139	18.7832	17.1912	22.8268
	harvest @ 4°C	30	9.19755	7.85569	8.52817	19.6578	12.3962	33.9248	10.779	12.0739	15.7328	22.6746	32.6143	43.9569	33.7269	62.9546	50.3688																				-62.9742	-68.376	-65.6689	-20.8652	-50.0978	36.5681	-56.6081	-51.3953	-36.666	-8.72073	31.2924	76.9533	35.7713
	Store @ 4°C	60	7.69825	8.84354	9.88741	5.62413	7.30816	8.14233	17.7761	7.31532	9.6751	18.36	13.0569	14.9098	17.8068	17.9774	10.2134																				-69.0098	-64.3993	-60.1971	-77.3594	-70.5802	-67.2221	-28.4404	-70.5514	-61.0518	-26.0896	-47.4379	-39.9789	-28.3168
	Image @ 37°C	120	9.16454	7.9454	8.6247	5.89781	5.82825	5.1465	5.89306	5.56441	6.54275	9.40737	7.82207	7.16738	20.9784	17.9502	11.2877																				-63.1071	-68.0149	-65.2803	-76.2577	-76.5377	-79.2822	-76.2768	-77.5999	-73.6615	-62.1296	-68.5114	-71.1469	-15.5492
		360	7.48032	7.04668	5.28761	6.407	7.166	8.33622	15.2878	4.97234	9.99349	6.11726	7.0912	5.40688	7.54927	7.07303	7.23854																				-69.8871	-71.6328	-78.7142	-74.2079	-71.1525	-66.4416	-38.4574	-79.9833	-59.7701	-75.3743	-71.4536	-78.234	-69.6096
	221117	720	6.71068	5.62411	6.84696	9.92075	6.71157	5.85292	7.6518	7.40872	7.29354	6.70774	5.58023	6.10894	8.20478	3.6556	4.38886																				-72.9854	-77.3595	-72.4368	-60.0629	-72.9818	-76.4384	-69.1968	-70.1754	-70.639	-72.9972	-77.5361	-75.4078	-66.9708
			220105-6								220119-20												220216-17
	Saline-nothing	0									35.5454	29.0505	18.9674		40.1316	47.1885	50.3496	45.6857	25.546	20.6263	18.5791	13.7268	44.0475	14.3545	38.0235
	harvest @ 4°C	30	25.3157	22.3939	20.6719	20.4445	19.6948	21.0053	18.7856	28.1615	24.4572	23.7276	18.4912	40.8594	10.8245	12.427	11.5189		20.3917	33.5805	20.531	30.6938	34.3302	40.5818	29.5423												-19.7821	-29.0405	-34.4971	-35.2176	-37.5933	-33.4405	-40.4742	-10.7648	-22.5025	-24.8144	-41.4069	29.4709	-65.7006
	Store @ rt	60	5.39491	4.80986	5.74381	4.26228	6.54957	6.54831	8.73848	7.74367	28.0136	27.6762	20.4683	21.5151	6.66096	6.47243	6.49498	2.40403	19.1878	12.5324	12.3652		18.7715	14.936	12.2547												-82.9052	-84.759	-81.7996	-86.4941	-79.2464	-79.2504	-72.3104	-75.4627	-11.2334	-12.3027	-35.1423	-31.8253	-78.8934
	Image @ 37°C	120	4.7251	7.29961	5.92481	4.42303	7.54216	8.13097	9.71706	6.41385	20.5685	40.9406	23.0311	19.5008	24.4071	25.7494	34.8609	16.4646	14.6676	14.3444	8.52657	13.0579	18.0347	34.6283	34.4854												-85.0276	-76.8698	-81.2261	-85.9848	-76.1012	-74.2354	-69.2096	-79.6765	-34.8248	29.7283	-27.0216	-38.208	-22.6614
		360	6.08296	6.77074	5.5908	6.03585	7.25126	6.99616	6.49578	7.9563	5.17473	4.94584	5.60425	5.0715	6.29059	4.88939	4.14738																				-80.7249	-78.5456	-82.2845	-80.8742	-77.023	-77.8313	-79.4168	-74.7889	-83.6029	-84.3281	-82.2418	-83.93	-80.067
	221117	720	7.65564	6.6223	4.4104	5.45918	5.51407	6.3101	7.01794	6.55351	6.24758	5.63715	6.55956	5.75616	7.19105	8.11798	6.5228																				-75.7416	-79.0159	-86.0248	-82.7015	-82.5276	-80.0052	-77.7623	-79.2339	-80.2033	-82.1376	-79.2148	-81.7605	-77.2138
			221028
	HBSS-nothing-no bicarb	0	45.9216	36.3622	31.4119	30.8136	37.3573	39.6991	33.4904	31.2439	37.9048	31.1241	22.49	36.6978	28.196	30.5934	28.8861
	harvest @ 4°C	30	18.0867	15.9717	12.0314	27.1054	24.159	17.8583	20.6959	16.1266	22.5157	33.2425	34.7916	31.0176	28.9544	26.1642	26.3484																				-45.9767	-52.294	-64.0634	-19.0388	-27.8395	-46.6588	-38.1833	-51.8314	-32.7478	-0.707869	3.91934	-7.35341	-13.516
	Store @ 4°C	60	28.0436	41.6551	22.1769	15.071	13.9502	8.19558	27.8559	21.1322	25.1726	29.3711	35.222	25.9574	15.6063	27.8622	15.3661																				-16.2363	24.4197	-33.7598	-54.9844	-58.332	-75.5206	-16.797	-36.8802	-24.8117	-12.2712	5.20475	-22.4678	-53.3853
	Image @ 37°C	120	24.9993	21.392	19.8761	22.4299	15.0648	22.9421	23.4382	25.969	29.5653	12.7793	11.6068	15.0211	28.5497	35.9224	13.9337																				-25.3294	-36.104	-40.6319	-33.0039	-55.0028	-31.4742	-29.9923	-22.4331	-11.6912	-61.8294	-65.3317	-55.1334	-14.7248
		360	13.7272	13.8393	23.9515	45.4263	59.5487	66.0047	38.8189	34.4086	21.9596	10.392	9.80919	10.5931	14.6672	11.1093	7.97636																				-58.9981	-58.6633	-28.4592	35.6841	77.8663	97.1498	15.9484	2.77512	-34.4087	-68.96	-70.7009	-68.3596	-56.1904
	221129	720	17.2053	54.9015	28.2385	31.3277	50.6763	26.4684	18.9355	24.6982	29.1732	20.4077	29.3276	32.3439	20.4312	4.86406	4.24589																				-48.6095	63.9855	-15.6542	-6.427	51.3654	-20.9414	-43.4413	-26.2287	-12.8624	-39.0443	-12.4012	-3.39184	-38.974
			221027
	HBSS-nothing-no bicarb	0	15.599	15.2567	20.0613	25.6665	26.7358	32.8399	36.9494	35.0675	31.4894	27.4365	20.8758	17.2412	20.6251	19.3943	49.2213
	harvest @ 4°C	30	23.8083	30.6156	34.887	18.175	20.0194	18.7081	32.7741	29.3902	16.3121	24.2819	16.1544	14.7147	19.424	23.003	26.7968																				-9.46495	16.4211	32.6638	-30.8863	-23.873	-28.8591	24.6291	11.7613	-37.9705	-7.66407	-38.5702	-44.045	-26.1371
	Store @ rt	60	17.0371	15.0284	18.1805	39.0787	18.0824	33.8273	35.6305	38.7626	47.8282	50.7263	50.1592	39.0021	14.2955	17.9574	7.59652																				-35.2136	-42.8521	-30.8655	48.6034	-31.2387	28.6343	35.4911	47.4016	81.8748	92.8955	90.739	48.312	-45.6389
	Image @ 37°C	120	27.7027	24.8186	20.7693	34.8296	23.0723	17.4611	23.3625	31.2861	42.0706	47.1368	44.8045	27.775	21.2627	13.7293	9.6701																				5.34428	-5.62321	-21.0211	32.4453	-12.2638	-33.6012	-11.16	18.9707	59.9807	79.2459	70.3769	5.61904	-19.1451
		360	29.1532	18.0613	31.0926	38.5747	29.3648	23.6582	16.257	19.8472	32.975	26.4776	26.7067	24.5294	30.1401	24.3417	37.6243																				10.8601	-31.319	18.2351	46.6868	11.6648	-10.0357	-38.1798	-24.5276	25.3929	0.685501	1.5567	-6.72259	14.6128
	221129	720	37.4057	32.796	29.6715	25.879	24.6595	24.6755	17.772	24.2858	18.9539	17.1592	15.6173	18.7751	36.6492	29.0637	25.9735																				42.2417	24.7125	12.8308	-1.59079	-6.22821	-6.16737	-32.4188	-7.64912	-27.9247	-34.7493	-40.6127	-28.6046	39.3649
			240313															240321-22
	HBSS+FBS-no bicarb	0	31.0933	36.4342	48.5782	37.191	40.6337	26.0937	23.7721	36.8736	17.2602	52.2221	65.5455	48.5444	47.4803	31.9657	22.6841	39.2508	58.7574	32.221	43.6128	57.6454	60.5391	39.4253	28.4452	18.2107
	harvest @ 4°C	30	39.8958	72.7755	96.6535	22.116	22.2254	17.8145	25.6724	27.2377	21.7732	66.1239	65.3621	51.7424	33.0166	35.3475	24.0261	54.3978	32.4619	48.9606	81.9093	100.419	108.036	15.5722	14.9061	36.471											1.37849	84.9285	145.604	-43.8015	-43.5235	-54.7318	-34.7644	-30.7868	-44.6724	68.0263	66.0905	31.4816	-16.102
	Store @ 4°C	60	22.6032	33.7733	48.6939	28.1832	24.0269	17.5222	43.5574	51.0765	30.9272	16.9454	18.0621	21.0962	19.3043	21.5367	35.1232	36.7149	34.6633	25.9326	38.6778	36.7249	48.0014	45.6937	33.0656	23.8252											-42.5633	-14.1793	23.7353	-28.3841	-38.9458	-55.4746	10.6829	29.7897	-21.4115	-56.9404	-54.1028	-46.3928	-50.9462
	Image @ 37°C	120	24.7958	42.9304	36.7012	36.094	59.4118	41.1924	16.0036	14.5171	16.8327	17.4505	36.7113	22.4924	19.3409	21.1267	23.1071	24.2539	25.1117	31.7195	25.3518	39.8721	52.5632	29.9039	24.52	18.6248											-36.9919	9.0897	-6.73915	-8.28219	50.9702	4.67336	-59.3336	-63.1109	-57.2268	-55.6568	-6.71368	-42.8449	-50.8532
		360	38.0127	36.0941	29.7957	32.0946	35.4258	67.456	43.3459	22.0617	18.4493	31.1542	57.0927	39.3188	43.9675	46.8276	55.1099																				-3.4067	-8.28183	-24.2866	-18.4451	-9.98027	71.4112	10.1454	-43.9394	-53.1187	-20.8347	45.0773	-0.0876778	11.725
	240229	720	28.2089	29.6258	33.7789	17.039	11.2899	10.2054	16.6575	17.5126	16.6178	15.1217	22.353	14.5355	23.3099	20.891	19.4285																				-28.3187	-24.7184	-14.165	-56.7024	-71.3115	-74.0673	-57.672	-55.4991	-57.7727	-61.5744	-43.1993	-63.0642	-40.7675
			240305-07
	HBSS+FBS-no bicarb	0	32.8148	23.9282	42.8193	20.3306	29.829	19.8082	41.1093	28.7764	36.7659	24.7964	25.1434	22.762	30.2557	31.4117	30.7777
	harvest @ 4°C	30	27.7367	30.388	46.7194	19.794	17.9611	23.7333	74.8118	62.9248	58.4423	44.7238	35.2713	30.6432	51.919	69.0014	49.0722																				-5.72783	3.28347	58.7912	-32.7235	-38.9533	-19.3345	154.273	113.87	98.6352	52.0084	19.8813	4.15092	76.4638
	Store @ rt	60	22.6873	24.3082	19.1257	54.7362	72.5415	47.6549	51.6988	85.2625	50.1963	46.5591	26.1734	31.1178	78.8281	35.4557	75.7351																				-22.8897	-17.3806	-34.995	86.0391	146.556	61.9707	75.7152	189.792	70.6085	58.2462	-11.041	5.76403	167.923
	Image @ 37°C	120	82.6629	76.8923	82.2179	76.4065	111.851	64.4609	61.8959	63.3336	68.6094	22.6231	27.6479	28.3246	26.572	27.2988	31.7847																				180.957	161.344	179.445	159.693	280.163	119.092	110.373	115.26	133.192	-23.108	-6.02944	-3.72955	-9.68621
		360	34.02	26.434	31.2936	54.1335	57.2356	50.2352	51.9514	28.6756	19.981	35.132	27.2004	35.7983	48.6055	54.071	60.5132																				15.628	-10.1552	6.36152	83.9906	94.534	70.7407	76.5739	-2.53642	-32.0881	19.4075	-7.55039	21.6724	65.2019
	240229	720	28.6373	15.9041	15.864	53.8326	37.1997	43.5902	18.1439	18.7842	10.7495	50.9779	30.1083	20.8777	45.6808	37.4855	30.0431																				-2.66666	-45.9448	-46.0811	82.9678	26.4354	48.1558	-38.3321	-36.1556	-63.4644	73.265	2.3329	-29.0402	55.2612
	HBSS-FBS+bicard no co2	0
	harvest @ 4°C	30
	Store @ rt	60
	Image @ 37°C	120
			220715
	RPMI-nothing	0	41.3805	24.2114	29.3057	24.3967	27.4561	28.1795				47.5223	59.8838	62.3028	12.2814	12.5202	11.1865	14.7287
	harvest @ 4°C	30	32.0637	28.1346	29.2188	28.0829	19.356	37.749	15.9345	19.4146	17.6416	41.4228	41.9013	60.9353	12.9162	13.0314	11.4643																				5.4311	-7.4883	-3.9235	-7.65827	-36.3541	24.1255	-47.6046	-36.1613	-41.9913	36.2055	37.7791	100.366	-57.5291
	Store @ 4°C	60	19.7852	25.0224	34.3288	46.2405	57.4056	41.0811	22.7402	23.807	23.2075	34.9472	25.1834	56.267	29.5139	25.9324	28.1458																				-34.9427	-17.7217	12.8793	52.047	88.76	35.082	-25.2261	-21.7184	-23.6897	14.9125	-17.1923	85.0159	-2.95314
	Image @ 37°C	120	27.1778	32.5828	45.0093	34.9696	18.3658	32.0493	19.4734	30.6309	27.8163	15.8551	17.4577	18.06	44.2082	44.3842	42.9808																				-10.6344	7.1381	47.9986	14.9863	-39.6098	5.38388	-35.968	0.719924	-8.53493	-47.8657	-42.5959	-40.6156	45.3646
		360	29.8733	22.4781	26.3059	22.9009	7.04701	27.4085	57.5499	39.2898	19.1487	22.9442	19.7874	28.0298	37.9841	84.4061	28.9778																				-1.77118	-26.0881	-13.5015	-24.6979	-76.8282	-9.8759	89.2345	29.1918	-37.0355	-24.5554	-34.9356	-7.83299	24.8986
	221123	720	34.3953	20.6839	22.9866	9.54185	11.9664	11.2195	33.9504	36.9637	19.9167	13.0871	20.9733	20.5448	57.1949	33.9095	23.0105																				13.0979	-31.9877	-24.4158	-68.6247	-60.6523	-63.1082	11.6351	21.5431	-34.5104	-56.9672	-31.0362	-32.4449	88.067
			220119-20							220202-04				220209-10							220216-17
	RPMI-nothing	0	16.8046	20.9827	19.447	32.9454	55.1732	46.2364	36.1318	26.1052	6.94578	10.6397		58.4878	45.0788	75.2267		29.2048	26.4906	36.981	48.6124	32.8312	28.4582
	harvest @ 4°C	30	29.7366	27.1664	22.0607	29.7423	27.5691	14.7665		42.2261	31.3173	42.1155		22.5502	27.8951	11.0756		99.5545	86.4025	28.9656	37.605	27.667	32.0108														-13.4481	-20.9292	-35.7898	-13.4315	-19.7569	-57.0205		22.9038	-8.84736	22.5821		-34.365	-18.808
	Store @ rt	60	75.2311	48.5429	61.7607	22.7535	38.498	20.0459		75.9991	88.2474	108.703	99.66	61.8016	37.8717	23.8633		41.204	51.8161	25.2957	13.9511	37.4882	16.4337	10.1709													118.969	41.2898	79.7615	-33.7735	12.0528	-41.6542		121.204	156.854	216.393	190.072	79.8805	10.23
	Image @ 37°C	120	29.6556	46.2027	34.9754	51.7282	44.1868	44.2187		52.1219	72.683	59.6927		92.1022	67.2722	88.0388	73.8225	30.4116	31.4227	41.9915	27.4695	51.4073	52.3663														-13.6841	34.4781	1.79978	50.5608	28.6107	28.7036		51.7068	111.552	73.7426		168.074	95.8035
		360	45.1766	36.4556	27.0063	31.5978	39.5692	40.2721	57.6792	31.4481	42.6865	9.3248	29.0394	21.6871	73.3329	64.4788	62.8345																				31.4918	6.1083	-21.3952	-8.03089	15.1707	17.2166	67.882	-8.46659	24.2438	-72.8591	-15.4776	-36.8772	113.444
	221123	720	15.9064	16.0146	13.6029	11.1247	11.2272	9.32886	68.4246	43.5848	27.2683	20.3753	9.45584	13.2301	36.6953	42.1213	41.6357																				-53.7026	-53.3878	-60.4073	-67.6203	-67.322	-72.8473	99.1577	26.8587	-20.6324	-40.6953	-72.4777	-61.4924	6.80575
			230629-30
	RPMI+FBS	0	71.9017	40.4366	34.9236	31.052	35.5279	31.286	20.9752	20.9948	30.5006	41.6338	49.8876	40.4695	40.8961	33.8462	34.8873
	harvest @ 4°C	30	32.0169	25.7431	32.9839	46.321	41.9963	25.2405	20.6358	17.8064	21.2165	59.3678	58.1859	57.2735	21.8031	25.7904	24.2726																				-14.1207	-30.949	-11.5268	24.2474	12.6472	-32.2971	-44.6484	-52.2376	-43.0906	59.2429	56.0728	53.6254	-41.5173
	Store @ 4°C	60	45.5153	27.3813	43.5927	46.9217	71.6739	73.0509	54.9491	44.7893	25.6428	32.3092	31.5442	23.9992	29.1863	33.814	29.3454																				22.0862	-26.5549	16.9292	25.8586	92.2518	95.9453	47.3905	20.139	-31.2179	-13.3368	-15.3887	-35.6267	-21.7132
	Image @ 37°C	120	42.8759	63.8647	47.8348	41.8402	43.679	45.0912	35.565	34.0226	30.6143	22.133	36.6321	24.6752	23.5398	22.7891	37.8831																				15.0065	71.305	28.3078	12.2285	17.1608	20.9487	-4.60358	-8.74071	-17.8829	-40.6323	-1.7413	-33.8133	-36.8589
		360	47.4685	38.4222	26.3044	34.1031	32.1253	24.9905				44.3479	26.1219	23.6272	37.1834	33.3658	45.4193																				27.3253	3.06032	-29.4434	-8.52498	-13.8299	-32.9676				18.955	-29.9329	-36.6244	-0.262632
	230721	720	42.4514	51.1475	43.8701	30.6672	23.0652	27.0096	17.8634	19.0126	17.0144				28.9371	26.0522	24.8574																				13.8678	37.1935	17.6732	-17.7409	-38.1319	-27.5519	-52.0849	-49.0022	-54.362				-22.3816
			230621-23
	RPMI+FBS	0	45.4152	29.2795	32.6762	43.5151	36.5886	37.106	42.7845	56.1703	53.825	53.207	50.3417	44.5981		49.2589	55.2041	58.6328
	harvest @ 4°C	30	21.7462	9.05955	7.64948	49.6852	54.8061	29.8601	38.519	35.1133	45.2674	47.5846	37.5008	42.4978	45.0063	54.5619	29.7511	21.9566																			-52.6298	-80.2654	-83.3369	8.23056	19.3854	-34.955	-16.0933	-23.5118	-1.39289	3.65468	-18.311	-7.42607	-1.96169
	Store @ rt	60	37.1401	36.4233	24.4504	45.4285	50.1486	35.1099	15.7242	13.6438	14.8946	50.9889	36.9871	49.3628	41.5732	59.6215	48.4523	118.294																			-19.0968	-20.6582	-46.7391	-1.04192	9.23979	-23.5193	-65.7475	-70.2794	-67.5548	11.0704	-19.4301	7.52826	-9.44015
	Image @ 37°C	120	69.9493	51.441	44.0398	43.8417	46.6178	46.3037	19.3171	21.1982	20.5206	44.9261	30.1697	31.7033	25.877	70.1153	54.5776	23.1315																			52.3722	12.0552	-4.06704	-4.49866	1.5487	0.864448	-57.921	-53.8234	-55.2994	-2.13633	-34.2805	-30.9399	-43.6314
		360	61.2283	39.6756	29.7298				29.8503	31.7612	34.2815	14.782	13.4891	12.8528	31.9299	15.7324	21.545																				33.3751	-13.5737	-35.2389				-34.9764	-30.8137	-25.3239	-67.8001	-70.6165	-72.0024	-30.4463
	230721	720	18.6218	14.5739	12.8006	50.3668	51.481	40.7678	26.0939	47.6628	41.3953	15.8148	12.1536	23.4659																							-59.4357	-68.2533	-72.1162	9.71516	12.1423	-11.1945	-43.1589	3.82493	-9.82772	-65.5502	-73.5255	-48.8836
			221005-07
	DPBS-nothing	0	29.6483	41.4158	31.1842	23.0762	17.8382	13.6542	53.8045	54.3517	40.7325	46.863	25.0346	28.9349	21.8842	57.6592	61.3579	33.2915
	harvest @ 4°C	30	41.0232	28.541	25.5156	21.8156	17.9476	26.1957	27.752	43.428	30.5423		43.4006	38.5587	47.9252	18.7864	29.7632	8.9366																			13.0249	-21.3653	-29.7007	-39.8948	-50.5517	-27.827	-23.5392	19.6506	-15.8513		19.575	6.2351	32.0409
	Store @ 4°C	60	17.6929	13.8595	22.7136	29.7214	22.341	35.7325	19.1896	19.1792	20.5485		31.5018	14.9831	43.8727	46.6014	42.3473	53.7404																			-51.2535	-61.8149	-37.4206	-18.1131	-38.4473	-1.55172	-47.1298	-47.1585	-43.3858		-13.2079	-58.7195	20.8759
	Image @ 37°C	120	27.6107	29.6527	21.1647	24.3011	26.8827	19.0968	27.6415	38.8771	36.0537		17.1727	12.1026	20.2339	60.5549	36.7184	36.8196																			-23.9283	-18.3024	-41.6882	-33.0469	-25.9343	-47.3856	-23.8435	7.11207	-0.666615		-52.6867	-66.6554	-44.2525
		360	18.7434	21.6771	18.1512	13.7369	7.9838	5.72755				51.0989	34.807	33.3544	11.9745	8.61246	10.8397																				-48.3592	-40.2765	-49.9907	-62.1529	-78.0034	-84.2197				40.7851	-4.10153	-8.10369	-67.0085
	221103	720	9.90329	26.7803	70.8521	15.6786	17.8984	28.5632				21.4133	22.8206	26.5631	28.4618	14.8885	16.6157																				-72.715	-26.2163	95.2081	-56.8032	-50.6873	-21.3042				-41.0031	-37.1257	-26.8146	-21.5834
			220112-13												220209-10
	DPBS-nothing	0	20.8876	31.7154	19.1343	14.7505	40.2452	34.3951	38.1913	45.2824	55.0761	30.409	40.8779	15.3052	18.8587	116.921	98.3751	58.3692	48.2453	57.5593	53.0438		25.3243	19.3981	21.9815
	harvest @ 4°C	30	28.5606	40.6473	44.3432						37.4417	24.0901	27.127		11.0567	20.0981	22.253		37.0317	64.8568	57.0233		35.6777	41.0744	32.1354												-30.5207	-1.11739	7.87347						-8.9156	-41.3961	-34.0082		-73.1025
	Store @ rt	60	44.8668	28.3052	34.6719		44.5578	36.3889	43.5454		17.8199	15.5329	14.3534	22.3196	82.9139	58.0979	49.4093		77.9211	47.8013	90.34	49.2395	26.573	37.6571	22.7712												9.14739	-31.1421	-15.6537		8.39558	-11.4769	5.93268		-56.6495	-62.2131	-65.0824	-45.7031	101.704
	Image @ 37°C	120	35.5058	27.5693	44.1661	35.3177	34.3847	39.7456	18.1026	31.933	57.3059	64.9473	52.6668	40.5565	39.7077	47.4393	50.1584		72.3772	81.7889	58.3215		69.4741	80.7875	76.9088												-13.6251	-32.9323	7.44265	-14.0828	-16.3526	-3.31088	-55.9619	-22.3166	39.408	57.997	28.1223	-1.33839	-3.40307
		360	12.4856	24.627	13.4529	57.4395	22.3957	35.0221	20.8927	20.3874	21.6382	22.3461	17.6363	27.0704	20.0669	32.3508	42.8395																				-69.6263	-40.0899	-67.2732	39.7329	-45.5181	-14.8019	-49.1743	-50.4037	-47.3608	-45.6386	-57.0962	-34.1459	-51.1834
	221103	720	43.0472	25.0436	17.1934	18.7861	19.3222	9.8394	49.0323	29.0306	55.2728	16.4426	11.4513	11.2101	14.1551	25.1288	21.2584																				4.72092	-39.0764	-58.1738	-54.2992	-52.9949	-76.0637	19.2808	-29.3773	34.4619	-60.0002	-72.1424	-72.7293	-65.565
			231129
	DPBS+FBS	0	14.0257	20.7939	14.6176	44.3666	49.1859	54.1874	25.9608	19.9107	26.6189	40.5844	36.2787	31.2031	31.6475	31.1363	41.2344
	harvest @ 4°C	30	8.23759	9.95519	8.813	62.9881	53.2767	60.4096	25.4656	31.9009	29.9564	41.2172	32.2206	30.45	48.3381	38.7245	40.6962																				-74.3512	-69.0032	-72.5595	96.1221	65.8844	88.0935	-20.7093	-0.672265	-6.72667	28.3354	0.323061	-5.1898	50.5074
	Store @ 4°C	60	22.7021	19.0062	27.3704	30.7559	46.422	32.1576	12.3542	33.6688	24.3386	22.7723	33.7498	20.8678	26.3249	29.0886	28.0347																				-29.3138	-40.8217	-14.7785	-4.23744	44.5412	0.12704	-61.5336	4.83237	-24.2184	-29.0953	5.08457	-35.0252	-18.034
	Image @ 37°C	120	42.0389	40.5818	29.6278	69.9764	92.6343	42.6206	38.8969	29.5523	23.4287	60.8335	83.9843	88.055	21.0107	15.2613	40.0648																				30.8939	26.3568	-7.74989	117.881	188.429	32.705	21.1107	-7.98502	-27.0517	89.4135	161.496	174.171	-34.5804
		360	15.8191	22.8267	13.7205	21.5877	12.8812	17.4164	30.3074	33.995	20.8579	20.416	19.3006	15.1854	98.3413	69.8508	24.9475																				-50.7452	-28.926	-57.2793	-32.7838	-59.8925	-45.7716	-5.63384	5.84803	-35.0562	-36.4319	-39.9049	-52.7182	206.199
	230728	720	25.1442	10.9677	23.0413	8.81377	12.2061	10.2919	20.7171	15.4844	15.5355	28.5693	14.3189	37.2101	34.1213	29.5113	13.0398																				-21.71	-65.8507	-28.2579	-72.5571	-61.9947	-67.9548	-35.4946	-51.7873	-51.6282	-11.0455	-55.4163	15.8588	6.24117
			231122-23
	DPBS+FBS	0	53.1758	26.0934	45.3253	43.4294	32.1401	25.4639	24.0156	18.6151	43.399	35.7894	23.9051	33.5629	11.4872	17.5894	15.5931
	harvest @ 4°C	30	37.5387	21.6266	36.6673	25.0545	19.5741	33.5107	28.4322	20.4468	18.0129	21.253	18.2494	17.4992	20.9936	18.5793	14.0484																				25.2447	-27.8446	22.3371	-16.4079	-34.6928	11.8054	-5.1384	-31.7809	-39.9015	-29.0913	-39.1123	-41.6154	-29.9568
	Store @ rt	60	21.2379	23.8672	25.4774	22.341	16.6363	35.4303	21.4483	19.3499	17.6328	14.7779	20.8389	14.3808	29.7247	28.15	25.383																				-29.1415	-20.3692	-14.9969	-25.4612	-44.4945	18.2103	-28.4396	-35.4406	-41.1698	-50.6949	-30.4728	-52.0196	-0.826237
	Image @ 37°C	120	36.8687	41.6422	29.5709	24.2707	22.4582	29.5943	25.473	14.0628	25.1937	22.3423	18.8992	12.3689	20.6962	27.5712	16.4089																				23.0091	38.9355	-1.33935	-19.0228	-25.0702	-1.26129	-15.0117	-53.0807	-15.9436	-25.457	-36.9444	-58.7323	-30.949
		360	59.3437	32.3209	50.4789	33.1346	31.4607	34.7357	25.3636	27.6676	23.2792	13.8762	11.5586	12.4428	49.7104	31.8596	36.9199																				97.9951	7.83577	68.4186	10.5507	4.96578	15.8927	-15.3767	-7.68953	-22.3309	-53.7033	-61.4356	-58.4858	65.8545
	230728	720	28.1818	27.4007	31.7817	49.5021	62.428	47.585	45.4584	39.9187	51.6154	17.4592	32.7454	18.0165	29.9948	25.9524																					-5.97381	-8.57985	6.03697	65.1596	108.285	58.7634	51.6681	33.1853	72.2104	-41.7489	9.25203	-39.8894	0.0749482
	DPBS-nothing-w/o CaMg	0
	harvest @ 4°C	30
	Store @ 4°C	60
	Image @ 37°C	120
		360
		720
	DPBS-nothing-w/o CaMg	0
	harvest @ 4°C	30
	Store @ rt	60
	Image @ 37°C	120
		360
		720
			220622-23									230615									240327-28
	L15-nothing	0	28.2742	51.8911	57.6542	31.0687	10.3498	31.8593	46.8612	33.9515	55.3986	51.3362	47.3271	57.5818	30.3999	24.1528	34.3304	50.1198	42.2413	52.8072	28.1601	30.873	28.6993	16.0921	17.8302	22.6095
	harvest @ 4°C	30	31.1291	16.7575	19.6651	30.5141	18.4875	20.5958	20.792	22.6534	12.2489	29.6766	55.5001	19.8022	23.9275	19.2111	22.9049	41.3468	30.526	19.5103	20.3825	36.7837	25.9066	31.4745	12.1685	17.7983											-15.2824	-54.3945	-46.4817	-16.9561	-49.6864	-43.9487	-43.4148	-38.3489	-66.6646	-19.2355	51.043	-46.1085	-34.8815
	Store @ 4°C	60	42.1555	14.127	21.0732	13.6076	33.0646	17.8897	16.5582	22.4232	17.3654	25.8253	31.2162	27.8594	41.8587	53.891	26.9601	58.332	27.6143	48.4141	11.4221	24.9558	15.1783	13.4078	19.6866	10.3393											14.7259	-61.5536	-42.6495	-62.9669	-10.015	-51.3132	-54.937	-38.9753	-52.7403	-29.7165	-15.0454	-24.1808	13.9182
	Image @ 37°C	120	27.2742	21.6843	19.2259	6.48102	13.7594	9.93443	30.0999	26.3527	30.3598	15.2018	20.0344	26.0144	29.5916	26.776	32.8209	23.0559	14.8997	34.4754	26.2385	13.9219	18.5419	6.52331	9.9332	12.7056											-25.7735	-40.9864	-47.6767	-82.3619	-62.5538	-72.9635	-18.0835	-28.2812	-17.376	-58.6285	-45.4766	-29.202	-19.4668
		360	25.8617	16.0133	15.1017	8.86453	15.9952	14.4076	12.2806	9.76086	9.23336	11.493	8.27459	6.15301	12.2237	11.6526	7.03504																				-29.6176	-56.4201	-58.9009	-75.8753	-56.4693	-60.7898	-66.5785	-73.4359	-74.8715	-68.722	-77.4808	-83.2546	-66.7334
	221121	720	10.1331	8.15869	15.4079	28.2384	41.7332	44.6939	13.6399	15.6379	10.0447	14.2696	10.0848	13.8067	14.6236	9.51014	15.8168																				-72.4228	-77.7962	-58.0676	-23.1495	13.5766	21.6342	-62.8791	-57.4415	-72.6633	-61.1654	-72.5543	-62.4252	-60.2019
			220126-27								220202-04															240327-28
	L15-nothing	0	21.4692	16.4016	15.8216		56.9097	55.4204	96.6865	65.3555	54.5659	36.8197	46.4004	18.9224	32.9907	34.4449	25.1187		32.4674	26.6252	18.8246	48.7896	44.3899	31.6166	43.6815	23.0964	23.2257	23.2848	21.0754	17.2236	23.1393
	harvest @ 4°C	30	24.7007	16.8936	13.0762		50.9659	38.515	53.5892		44.4365	47.7147	16.8356		23.6053	27.4022	20.2931		17.0829	18.8594	18.4582	18.2373	18.2198	27.4376		8.26097	9.91117	11.2467	19.8989	27.3764	16.1084						-30.1484	-52.2264	-63.0217		44.1271	8.91698	51.5457		25.6626	34.9331	-52.3904		-33.2462
	Store @ rt	60	19.3799	26.9176	27.964		35.8068	14.5121	18.217						32.1036	18.1585	20.5185		44.5117	19.603	30.2578	9.93798	11.287	20.5079	15.3036	13.6781	10.374	21.8467	14.346	9.30922	17.0576						-45.1954	-23.8794	-20.9203		1.25868	-58.9609	-48.4838						-9.21379
	Image @ 37°C	120	15.8645	16.8304	11.6081	11.0646	16.433	28.3837	15.6789		9.1533	8.07227	10.7019		16.7852	12.1344	30.3741	14.7091	12.4485	36.9003	36.4899	29.2872	66.7717	41.6482	20.7061	17.2237	16.6439	17.4202	31.0551	18.5891	23.6731						-55.1366	-52.405	-67.1732	-68.7103	-53.5287	-19.7332	-55.6613		-74.1152	-77.1723	-69.7359		-52.5328
		360	8.68057	20.7973	15.1532	41.9036	31.8127	19.6384	12.262	14.1574	8.51282	19.1165	19.7678	13.0945	27.4661	25.6332	29.1708																				-75.4521	-41.1869	-57.148	18.4997	-10.0364	-44.4644	-65.3242	-59.9642	-75.9265	-45.9401	-44.0984	-62.9698	-22.3282
	221121	720	16.3475	15.8244	24.828	29.6738	18.0017	18.2727	22.2242	21.3598	22.7896	11.8964	14.9993	17.5572	30.7812	14.9864	22.6799																				-53.7708	-55.25	-29.7886	-16.0851	-49.0926	-48.3265	-37.1518	-39.5963	-35.5531	-66.3581	-57.5831	-50.3498	-12.9535
	L15-nothing	0
	harvest @ 4°C	30
	Store @ 37	60
	Image @ 37°C	120
		360
		720
			220622-23							220721-22
	L15 + FBS	0	47.0314	83.4374	23.8399	34.7577	29.6782	31.7955	33.9461	20.9472	33.311	16.7859	88.8932	64.7472	117.659	60.993	33.1856	47.4917	41.6399	23.697	60.1352	39.2917
	harvest @ 4°C	30	8.30252	12.0226	8.25627		43.0811	33.6037	33.9479	33.628	30.263	34.2582	30.0707	19.8538	51.0243		47.9	58.1131	65.0488	42.5694	40.481	26.8038															-82.2076	-74.2354	-82.3067		-7.67655	-27.9868	-27.249	-27.9346	-35.1458	-26.5842	-35.5579	-57.4531	9.34596
	Store @ 4°C	60	15.3765	17.9468	17.177		34.4022	35.8964	33.9996	37.6592	26.3206	40.4702	22.0552	35.4226	28.3867		60.3561	73.621	62.5097	35.0773	32.7229	28.7891															-67.048	-61.5397	-63.1894		-26.2756	-23.0735	-27.1382	-19.2957	-43.5946	-13.2717	-52.7353	-24.0888	-39.1667
	Image @ 37°C	120	15.6861	18.5591	14.3333		20.1047	23.2118	30.6928	33.5518	27.9205	22.837	28.5243	39.444	40.307		16.7189	14.3653	18.2262	18.8508	26.1267	26.6515															-66.3844	-60.2275	-69.2835		-56.9154	-50.2567	-34.2248	-28.0979	-40.1658	-51.06	-38.872	-15.4709	-13.6214
		360	49.0455	40.9238	32.6488	28.1336	34.7389	26.0665	22.3064	41.4687	23.2567	30.6419	19.0284	19.6323	53.9523	21.2926	13.2993																				5.10524	-12.2996	-30.0331	-39.7091	-25.554	-44.1392	-52.197	-11.1318	-50.1606	-34.3339	-59.2218	-57.9276	15.6206
	221122	720	19.294	27.6741	22.2281	41.0175	57.8869	41.0085	17.0139	23.4235	23.2082	16.4475	16.9992	12.5011	42.4443	36.0079	35.4393																				-58.6526	-40.694	-52.3648	-12.0989	24.0525	-12.1181	-63.5389	-49.803	-50.2645	-64.7528	-63.5704	-73.21	-9.04113
			220629-30															240321-22
	L15 + FBS	0	31.931	25.7863	14.6586	27.5484	24.6562	16.1556	39.2841	38.1693	28.9682	36.412	18.7565	25.9373	43.3686	31.9089	33.192	49.0526	91.994	63.0713	62.08	53.5175	51.1882
	harvest @ 4°C	30	61.9111	61.9958	41.6989	36.7576	41.7089	42.7805	35.1281	50.8825	62.7805	32.1947	30.6104	29.7593	20.9453	22.7564	31.7806	27.2719	44.8255	27.8057	30.4831	26.7483	30.2878														60.98	61.2001	8.42452	-4.42354	8.45057	11.237	-8.66059	32.3035	63.2406	-16.288	-20.4075	-22.6205	-45.5386
	Store @ rt	60	27.2714	21.9182	29.4163	42.8064	59.0331	41.6761	44.4483	38.6837	59.8616	50.4645	50.3994	61.955	48.5568	45.5376	59.6431	61.008	48.5534	67.5739	55.5105	71.3269	61.6803														-29.0895	-43.0086	-23.5124	11.3042	53.4966	8.36539	15.5735	0.58467	55.6509	31.2167	31.0475	61.0942	26.2563
	Image @ 37°C	120	22.8044	18.2423	22.6266	46.5155	50.6565	52.2802	21.0545	15.2035	17.4387	57.0467	48.1902	73.7843	29.4259	29.2604	45.2209	54.2961	40.8891	35.4928	42.2871	40.6054	38.1809														-40.7044	-52.5667	-41.1669	20.9485	31.7161	35.9378	-45.2544	-60.4682	-54.6562	48.3316	25.3033	91.8525	-23.4875
		360	41.5342	28.8904	25.6306	48.3475	35.8559	40.6584	58.1828	42.7467	68.1249	53.3549	103.81	70.3943	73.5695	40.0437	28.4655																				7.99647	-24.8799	-33.3559	25.7123	-6.76813	5.71914	51.2858	11.149	77.1369	38.7323	169.924	83.0379	91.2939
	221122	720	36.5078	35.3544	24.7966	50.3328	58.518	72.358	92.7698	92.6122	72.7909	24.1685	19.9043	21.3475	43.4294	36.8866	36.712																				-5.07305	-8.07214	-35.5245	30.8742	52.1573	88.1438	141.218	140.808	89.2694	-37.1577	-48.2454	-44.4926	12.9243
	L15 + FBS	0
	harvest @ 4°C	30
	Store @ 37	60
	Image @ 37°C	120
		360
		720
	M199-nothing	0
	harvest @ 4°C	30																																			#DIV/0!	#DIV/0!	#DIV/0!	#DIV/0!	#DIV/0!	#DIV/0!	#DIV/0!	#DIV/0!	#DIV/0!	#DIV/0!
	Store @ 4°C	60																																			#DIV/0!	#DIV/0!	#DIV/0!	#DIV/0!	#DIV/0!	#DIV/0!	#DIV/0!	#DIV/0!	#DIV/0!	#DIV/0!	#DIV/0!
	Image @ 37°C	120																																			#DIV/0!	#DIV/0!	#DIV/0!	#DIV/0!	#DIV/0!	#DIV/0!	#DIV/0!	#DIV/0!	#DIV/0!	#DIV/0!
		360																																			#DIV/0!	#DIV/0!	#DIV/0!	#DIV/0!	#DIV/0!	#DIV/0!	#DIV/0!	#DIV/0!	#DIV/0!	#DIV/0!	#DIV/0!	#DIV/0!
		720																																			#DIV/0!	#DIV/0!	#DIV/0!	#DIV/0!	#DIV/0!	#DIV/0!	#DIV/0!	#DIV/0!	#DIV/0!	#DIV/0!	#DIV/0!	#DIV/0!
	M199-nothing	0
	harvest @ 4°C	30																																			#DIV/0!	#DIV/0!	#DIV/0!	#DIV/0!	#DIV/0!	#DIV/0!	#DIV/0!	#DIV/0!	#DIV/0!	#DIV/0!
	Store @ rt	60																																			#DIV/0!	#DIV/0!	#DIV/0!	#DIV/0!	#DIV/0!	#DIV/0!	#DIV/0!	#DIV/0!	#DIV/0!	#DIV/0!	#DIV/0!
	Image @ 37°C	120																																			#DIV/0!	#DIV/0!	#DIV/0!	#DIV/0!	#DIV/0!	#DIV/0!	#DIV/0!	#DIV/0!	#DIV/0!	#DIV/0!	#DIV/0!	#DIV/0!
		360																																			#DIV/0!	#DIV/0!	#DIV/0!	#DIV/0!	#DIV/0!	#DIV/0!	#DIV/0!	#DIV/0!	#DIV/0!	#DIV/0!
		720																																			#DIV/0!	#DIV/0!	#DIV/0!	#DIV/0!	#DIV/0!	#DIV/0!	#DIV/0!	#DIV/0!	#DIV/0!	#DIV/0!
			231116-17
	M199 no bicab/fb	0	25.3578	10.1188	28.23	41.5052	52.4707	47.3447	54.4219	57.932	32.4838	24.5347	33.3853	36.4132	46.9073	41.9423	62.9937
	harvest @ 4°C	30	23.857	44.4268	37.4106	73.7102	38.6149	32.5677	31.9068	27.5801	22.8022	30.2511	34.4752	28.6005	70.927	68.48	55.2331																				-39.9614	11.8047	-5.85242	85.4994	-2.82171	-18.0401	-19.7033	-30.5918	-42.6159	-23.8699	-13.2396	-28.024	78.4952
	Store @ 4°C	60	30.6895	25.3744	24.4543	48.3934	31.6723	41.6487	49.1644	52.7812	41.7872	19.8105	20.1558	19.2925	27.245	52.3787	25.4307																				-22.7667	-36.1427	-38.4583	21.787	-20.2934	4.81323	23.7273	32.8295	5.16194	-50.1447	-49.2758	-51.4483	-31.435
	Image @ 37°C	120	27.688	24.7991	13.4157	35.6221	37.2841	33.7457	42.6681	31.6236	41.0033	27.1152	17.0841	19.2872	57.0431	27.2723	45.0523																				-30.3203	-37.5904	-66.238	-10.3532	-6.17058	-15.0754	7.37878	-20.416	3.18912	-31.7618	-57.006	-51.4618	43.5549
		360	25.4899	26.2516	26.316	31.8638	34.3369	36.4067	20.7639	29.4162	24.3814	25.825	46.5503	42.1881	27.1965	35.521	15.548																				-35.852	-33.9352	-33.7729	-19.8115	-13.5876	-8.37877	-47.7454	-25.971	-38.6416	-35.0088	17.1487	6.17066	-31.5573
	231109	720	13.0507	7.26583	10.108	27.2696	30.043	26.5708	13.1692	13.8499	13.9075	32.007	47.1441	29.5362	25.7296	17.9605	19.837																				-67.1567	-81.7148	-74.562	-31.3732	-24.3938	-33.1318	-66.8582	-65.1454	-65.0003	-19.4512	18.643	-25.669	-35.2488
			231102-03
	M199 no bicab/fb	0	33.9466	26.8637	32.2212	27.9885	34.7586	25.631	56.7021	24.4061	22.9714	31.0037	49.6706	42.4368	34.1267	40.0152	22.9894	20.5244
	harvest @ 4°C	30	17.8629	16.6564	21.3439		26.4515	29.0338	33.3994	60.016	46.5651	52.1174	30.3656	36.9754	21.5384	34.7195	36.7759	41.3531																			-45.6907	-49.3589	-35.1072		-19.5782	-11.7272	1.54565	82.4694	41.5741	58.4549	-7.678	12.418	-34.5157
	Store @ rt	60	38.3599	45.964	20.8306		29.984	33.9058	37.9324	25.9308	20.0468	15.9284	22.5131	17.8513	11.0149	40.1075	41.7119	31.441																			16.6272	39.7465	-36.6678		-8.83827	3.08521	15.3277	-21.1614	-39.0509	-51.5721	-31.5524	-45.726	-66.5108
	Image @ 37°C	120	49.5602	43.8957	53.0853		46.1534	38.5654	47.8394	68.3935	60.1016	67.403	60.9092	92.9251	57.3721	34.4486	38.6749	35.213																			50.68	33.458	61.3977		40.3223	17.252	45.4483	107.94	82.7297	104.928	85.1851	182.525	74.4312
		360	25.9521	21.4851	18.737	53.6258	50.2139	39.9831	59.5151	79.9389	53.194	39.7754	44.5575	33.5495	51.3292	49.247	32.2774																				-21.0967	-34.6779	-43.033	63.0411	52.6676	21.5624	80.9466	143.042	61.7282	20.9309	35.4704	2.00197	56.0585
	231109	720	25.568	22.8025	38.3007	24.5011	41.1554	31.9666	41.032	37.3413	32.1138	73.4548	52.3656	57.1447	46.2915	26.2833	25.5597																				-22.2646	-30.6726	16.4474	-25.5081	25.1268	-2.81054	24.7515	13.5305	-2.363	123.328	59.2096	73.7397	40.742
			231213
	M199 + FBS no bicab	0	31.1142	35.3665	38.0777	34.9826	25.0837	26.9304	21.177	11.8264	15.9002	16.5858	14.1727	26.4923	29.158	22.2224	28.8311
	harvest @ 4°C	30	55.8921	33.8565	40.9559	27.2067	30.9446	23.678	18.4931	21.285	19.5493	28.9468	16.9233	19.5964	13.5024	21.6347	12.2179																				121.841	34.3795	62.5574	7.98568	22.8216	-6.02016	-26.5993	-15.5182	-22.407	14.8923	-32.8299	-22.2201	-46.4078
	Store @ 4°C	60	23.5172	42.2043	22.556	21.2799	24.6826	21.1142	26.5461	35.4678	33.4582	66.7594	34.8855	39.417	11.0832	20.2203	25.299																				-6.65836	67.5126	-10.4732	-15.5384	-2.03267	-16.1959	5.3636	40.7747	32.7985	164.974	38.4636	56.4492	-56.0097
	Image @ 37°C	120	57.8404	43.0394	24.071	22.1516	33.8634	17.6939	13.8526	33.8847	22.5657	27.8909	24.7007	23.1939	19.657	18.7682	18.5447																				129.573	70.8268	-4.46017	-12.0785	34.4065	-29.7716	-45.0177	34.4912	-10.4348	10.7014	-1.96087	-7.94137	-21.9795
		360	61.8071	57.1966	30.596	16.2435	17.6301	27.9952	18.5251	22.3266	19.7509	61.5666	43.8989	47.4187	30.1967	40.6836	28.784																				145.317	127.018	21.438	-35.5283	-30.0248	11.1153	-26.4723	-11.3837	-21.6071	144.363	74.2386	88.2089	19.8534
	240118	720	15.7029	16.9516	18.5166	28.8395	26.6614	24.0654	24.2665	36.573	42.4711	23.7429	32.377	26.9991	16.6912	22.1352	31.0543																				-37.6739	-32.7176	-26.5062	14.4664	5.82148	-4.48224	-3.68439	45.1611	68.5715	-5.7624	28.5071	7.16164	-33.7511
			231206-7
	M199 + FBS no bicab	0	48.7867	39.267	36.3504	30.0472	69.2479	55.6905	34.8892	51.1728	43.2672	16.5876	11.5366	25.475	59.5898	18.4835	24.3128
	harvest @ 4°C	30	62.0588	53.6963	45.6296	42.799	36.9881	52.3519	28.309	39.7606	41.3497	48.2956	58.1137	37.0864	22.0601	74.7959	15.8501																				64.8442	42.6313	21.2041	13.6852	-1.75005	39.0602	-24.8039	5.61432	9.83558	28.2855	54.3649	-1.489	-41.4028
	Store @ rt	60	25.426	21.9296	24.4808	67.7857	52.7374	76.2017	56.4502	27.2825	38.8992	30.9	30.805	31.7156	73.0252	45.3479	66.4748																				-32.4621	-41.7493	-34.9726	80.0563	40.0841	102.411	49.9463	-27.5307	3.32625	-17.9217	-18.174	-15.7552	93.9739
	Image @ 37°C	120	61.0644	78.2973	62.5639	38.035	37.576	38.6289	43.748	26.5226	25.6559	29.4985	35.8023	26.2097	41.2327	43.7666	45.0816																				62.2029	107.978	66.1858	1.0309	-0.188442	2.60828	16.2059	-29.549	-31.8513	-21.6442	-4.89988	-30.3804	9.52457
		360	38.4692	25.7526	24.5071	22.0968	16.8754	27.2765	34.1576	20.8735	26.3725	69.5473	52.323	52.5275	33.1693	54.4039	87.1047																				2.18404	-31.5945	-34.9028	-41.3053	-55.1745	-27.5466	-9.26851	-44.5546	-29.9479	84.7356	38.9834	39.5266	-11.8938
	240118	720	58.0849	55.8488	46.8853	31.682	32.8427	23.5791	56.8224	52.4037	36.4829	18.2288	58.6984	41.3246	14.2439	26.1987	23.6064																				54.2884	48.3488	24.5394	-15.8445	-12.7613	-37.3678	50.9349	39.1978	-3.09195	-51.5797	55.918	9.76889	-62.1646
			221021
	DMEM-nothing	0	34.7662	28.3005	31.5344	15.6118	40.3988	36.5808	19.1761	11.5037	17.4312	42.9894	46.5555	38.9212	42.0473	49.7837	28.1295
	harvest @ 4°C	30	31.4407	25.7278	19.2437	63.3448	32.6044	57.466	49.6594	45.6444	40.7081	50.6252	58.0176	36.701	28.0271	21.2096	25.2167																				-2.50549	-20.2207	-40.3271	96.4263	1.10317	78.1965	53.9891	41.5388	26.232	56.9839	79.907	13.8063	-13.0906
	Store @ 4°C	60	25.4273	20.9184	16.808	20.9697	16.4224	27.9801	40.593	51.1382	30.3458	52.6323	50.8725	49.4974	59.482	24.8904	31.4874																				-21.1523	-35.1339	-47.8801	-34.9751	-49.0758	-13.2365	25.8749	58.5746	-5.90046	63.2076	57.7506	53.4867	84.4479
	Image @ 37°C	120	45.3821	51.6597	25.9926	18.8455	30.5493	29.5844	52.6843	51.7115	50.3322	17.7621	26.8706	11.2672	27.9835	26.8146	25.9988																				40.7255	60.1918	-19.3994	-41.5619	-5.26973	-8.26148	63.3689	60.3523	56.0751	-44.9214	-16.6769	-65.0615	-13.2258
		360	33.7171	26.0348	32.4311	30.5587	25.7181	20.1983	27.3041	37.0114	29.4768	74.8135	59.2167	52.9701	22.9984	32.6495	19.391																				4.55332	-19.2686	0.565681	-5.24027	-20.2507	-37.3671	-15.3325	14.7689	-8.59516	131.989	83.6254	64.2551	-28.6843
	221128	720	41.6189	15.8695	27.4716	34.5363	42.6357	25.862	39.0653	35.6441	24.8422	17.3107	21.4397	12.8484	27.4451	36.1061	22.0576																				29.0561	-50.7903	-14.8132	7.0936	32.2092	-19.8044	21.1378	10.5288	-22.9666	-46.321	-33.5175	-60.1583	-14.8953
			230222-24
	DMEM-nothing	0	29.1033	21.6978	19.5647	33.6548	20.1494	21.1651	30.9779	32.2725	32.2598	20.2902	27.1598	18.2101	40.3736	49.9056	39.7165
	harvest @ 4°C	30	23.6453	19.9886	14.7709	34.4754	25.0705	34.4135	20.5738	21.1376	24.8621	34.6469	50.6385	22.5712	58.465	75.3647	30.7455																				-18.745	-31.3109	-49.241	18.4718	-13.8472	18.259	-29.2999	-27.3624	-14.5635	19.0612	74.0148	-22.4359	100.91
	Store @ rt	60	34.0168	34.0858	34.6933	31.0434	58.7906	28.0882	44.0305	24.0409	20.5796	65.126	30.5306	43.2538	28.9642	30.5412	45.9594																				16.8958	17.133	19.2205	6.67796	102.029	-3.47727	51.3069	-17.3856	-29.2798	123.8	4.91583	48.6382	-0.467059
	Image @ 37°C	120	29.2203	19.5951	30.8215	75.4164	60.2089	42.7044	29.2261	31.4985	36.0743	55.9235	24.7409	24.8647	28.0944	37.5041	30.9688																				0.413212	-32.6631	5.91555	159.162	106.903	46.7502	0.433097	8.24205	23.9662	92.1762	-14.9801	-14.5546	-3.45583
		360	27.7966	17.2235	35.377	26.519	19.1298	22.1907	9.81783	9.17627	8.81944	32.8977	32.8595	32.3448	65.5121	55.1948	63.5689																				-4.47928	-40.8129	21.5699	-8.86969	-34.2619	-23.7437	-66.2619	-68.4665	-69.6927	13.0501	12.919	11.1503	125.127
	221128	720	41.6264	38.0499	34.6168	38.8963	30.4373	37.0585	31.9172	27.3953	25.8464	10.5544	11.0731	9.61226	37.054	69.7144	44.8529																				43.0455	30.7554	18.9576	33.6639	4.59511	27.3484	9.68086	-5.85843	-11.181	-63.7308	-61.9481	-66.9683	27.3329
			240501-02
	DMEM+FBS	0	47.4005	27.9462	28.259	17.4751	12.8595	11.6978	19.0557	28.525	16.6593	46.1726	23.3995	35.3839	36.119	32.5257	36.8919
	harvest @ 4°C	30	25.6766	18.1999	25.9422	14.5527	18.5508	26.554	8.3989	13.2876	22.6092	15.5266	20.334	13.4526	37.8625	52.904	54.1041																				-8.3788	-35.0578	-7.43093	-48.0718	-33.8056	-5.2481	-70.0304	-52.586	-19.3239	-44.5966	-27.4426	-51.9975	35.1041
	Store @ 4°C	60	26.0909	23.7637	21.6574	22.9243	28.1167	18.3591	13.5635	20.5138	20.9898	18.3334	13.7751	13.2498	16.6507	26.5698	21.8994																				-6.9004	-15.2045	-22.7205	-18.1996	0.328261	-34.4896	-51.6015	-26.801	-25.1027	-34.5813	-50.8464	-52.721	-40.5856
	Image @ 37°C	120	13.2443	14.336	7.32212	14.7423	10.6106	9.33224	30.7986	29.6597	29.2596	20.7662	29.2906	16.7051	20.5697	16.2629	16.681																				-52.7407	-48.845	-73.8726	-47.3953	-62.1383	-66.7	9.89813	5.83407	4.40638	-25.9005	4.51696	-40.3917	-26.6015
		360	35.5013	33.4272	32.5231	16.0568	9.13786	22.325	30.7437	49.3567	27.0587	40.6264	45.5172	62.2213	46.05	32.1902	78.0436																				26.6787	19.2775	16.0516	-42.7047	-67.3935	-20.3382	9.70204	76.1184	-3.44698	44.9664	62.4182	122.023	64.3193
	240426	720	12.7565	14.2231	11.3011	26.552	19.8745	16.9254	36.0973	19.375	13.2178	19.9766	15.426	16.3566	23.3071	8.66897	21.5221																				-54.4811	-49.2482	-59.6744	-5.25522	-29.0822	-39.6053	28.8053	-30.8647	-52.8354	-28.7178	-44.9556	-41.6352	-16.8336
			240418
	DMEM+FBS	0	12.1405	14.5293	26.7402	23.8111	18.6202	24.69	32.3111	26.6962	16.6604	24.3782	23.5122	29.2885	31.2175	37.4351	25.3621
	harvest @ 4°C	30	22.4466	28.9862	21.786	22.4389	29.9949	47.4103	39.1336	42.3113	36.1441	35.5878	21.9261	14.9431	44.486	47.6339	41.9669																				-8.35421	18.3455	-11.0517	-8.38598	22.4639	93.5682	59.7757	72.7496	47.57	45.2991	-10.4794	-38.9898	81.6287
	Store @ rt	60	19.9114	27.6917	25.7656	37.8361	44.6892	29.8648	65.6253	45.1522	48.0551	16.5927	22.5997	15.1695	45.1263	45.2294	33.9257																				-18.7053	13.0604	5.19655	54.4782	82.4582	21.9328	167.937	84.3486	96.2006	-32.2549	-7.7294	-38.0654	84.2427
	Image @ 37°C	120	22.8844	23.6698	24.706	23.9822	31.3052	18.5876	23.9357	37.8635	31.1041	17.0736	21.0127	15.2056	37.3118	34.6684	42.3638																				-6.56699	-3.36029	0.870515	-2.08495	27.8138	-24.1101	-2.27475	54.5902	26.9927	-30.2915	-14.2088	-37.9182	52.3375
		360	23.344	30.6463	49.8932	30.4787	30.5824	34.8148	36.4975	29.5708	23.9876	40.6831	59.1197	64.1795	39.7347	58.598	38.2024																				-4.69047	25.1237	103.705	24.4391	24.8629	42.1428	49.0132	20.7323	-2.06293	66.1021	141.375	162.034	62.2298
	240426	720	11.0553	9.74609	11.8347	28.2607	16.2492	28.4109	36.5331	22.1766	19.1196	52.4791	40.2636	48.0038	22.1049	45.3917	22.9268																				-54.8631	-60.2084	-51.6811	15.3836	-33.6572	15.997	49.1582	-9.45672	-21.9378	114.263	64.3893	95.9914	-9.74947
			231026-27
	MEM-nothing	0	45.1171	31.7938	41.7996	18.0585	15.5973	16.5459	26.8605	7.95632	11.7647	17.2874	6.04902	49.217	28.6835	23.9731	39.6529	41.003	51.7283
	harvest @ 4°C	30	57.3652	60.3784	51.4129	22.311	20.0776	24.8195		5.9487	5.59809	7.09518		54.9851	52.1452	35.2283	31.2999	48.1965	30.328																		106.137	116.965	84.7477	-19.8274	-27.8529	-10.8134		-78.6239	-79.8838	-74.5041		97.584	87.3793
	Store @ 4°C	60	50.7992	98.0463	58.3493	22.1322	43.1931	35.1299		16.9942	16.3699	16.8274		72.7038	64.8428	36.7983	49.2792	32.5338	36.8335																		82.5425	252.321	109.673	-20.4697	55.2105	26.2361		-38.9327	-41.1763	-39.5321		161.255	133.007
	Image @ 37°C	120	31.0248	34.434	19.1255	30.4698	45.1526	18.2862		57.6128	37.2459	54.1076		66.2768	30.2538	42.445	37.9412	29.303	24.8896																		11.4848	23.7356	-31.2742	9.49063	62.2519	-34.2901		107.027	33.8398	94.4309		138.16	8.71423
		360	36.9785	53.6435	31.4328	16.3557	15.4213	15.561	25.9415	50.8288	34.0201	19.5	33.998	36.1456	35.9175	44.2278	48.538																				32.8791	92.7632	12.9512	-41.2272	-44.5849	-44.0828	-6.78163	82.6488	22.2482	-29.9284	22.1688	29.886	29.0662
	231025	720	40.4327	37.4194	37.5475	28.11	23.5012	56.7146	14.2869	16.4111	28.2497	16.6326	14.8775	16.2859	50.532	30.4593	34.0826																				45.2915	34.4634	34.9236	1.01069	-15.5505	103.799	-48.6612	-41.0283	1.5127	-40.232	-46.539	-41.4782	81.5823
			231024
	MEM-nothing	0	49.8585	41.1396	40.2358	19.7277	24.5204	15.4807	59.3511	33.3942	25.2786	23.1849	25.3904	28.9588	39.486	30.518	25.3039
	harvest @ 4°C	30	57.7873	43.3781	43.138	46.2684	28.4248	37.4382	31.683	32.7659	38.6178	40.1348	45.5649	44.0276	47.428	28.9722	42.8152																				79.9001	35.0422	34.2945	44.0401	-11.5095	16.5502	-1.36639	2.00493	20.2227	24.9453	41.85	37.0642	47.6499
	Store @ rt	60	62.6714	48.9284	68.4334	50.4787	37.4963	48.3606	34.7138	24.5741	21.8812	46.3403	50.5821	55.7635	25.8428	21.447	30.0899																				95.1049	52.3211	113.043	57.1472	16.7312	50.5533	8.06906	-23.4974	-31.8807	44.2639	57.4691	73.5997	-19.5478
	Image @ 37°C	120	9.55866	8.87936	10.9826	31.5598	33.8193	30.2687	40.6072	40.5681	33.3081	45.096	36.5904	36.7266	55.8732	67.8918	39.5065																				-70.2426	-72.3573	-65.8095	-1.7498	5.28428	-5.76917	26.4158	26.2941	3.69278	40.39	13.9111	14.3351	73.9411
		360	37.2585	21.322	19.9236	51.7254	41.0686	48.6967	54.6621	48.0529	55.2633	68.5172	75.1746	56.7061	58.2156	55.0465	55.3503																				15.9909	-33.6216	-37.9752	61.0283	27.8522	51.5995	70.1707	49.5954	72.0424	113.304	134.029	76.5339	81.2332
	231025	720	10.9701	8.90058	16.1834	44.4817	50.0461	36.6062	34.9167	29.6267	47.4484	44.0433	73.1143	44.8872	20.3391	37.0423	21.1203																				-65.8485	-72.2913	-49.6187	38.4777	55.8006	13.9603	8.70054	-7.768	47.7136	37.113	127.615	39.7403	-36.6815
			240220-21
	MEM+FBS	0	32.2583	24.487	26.5718	36.1316	44.3524	46.7724	33.506	31.7301	31.5931	43.6868	34.509	39.5506	19.2613	15.7181	8.96442
	harvest @ 4°C	30	43.7661	28.7039	59.0151	64.6928	43.3621	50.7799	74.3121	51.1732	62.8973	34.6213	24.5382	43.405	67.8663	29.8319	36.6844																				39.9492	-8.21472	88.7101	106.865	38.6573	62.3768	137.625	63.6346	101.124	10.7071	-21.5352	38.7943	117.013
	Store @ 4°C	60	50.5481	39.1301	46.0397	38.4711	28.9747	26.4303	40.4804	48.4797	40.2827	22.9182	43.6188	22.0572	38.6304	27.8781	25.5748																				61.6356	25.1248	47.2192	23.0174	-7.34883	-15.485	29.4426	55.0217	28.8103	-26.7152	39.4782	-29.4684	23.527
	Image @ 37°C	120	29.157	20.1911	27.2127	54.3742	46.1651	55.8208	53.941	30.6242	36.6638	27.6147	30.6897	19.873	20.443	32.1251	41.0843																				-6.76567	-35.4358	-12.983	73.8703	47.6201	78.496	72.485	-2.07427	17.2385	-11.6974	-1.86468	-36.4528	-34.6302
		360	43.9583	53.8086	38.5277	32.3751	25.7428	33.5593	29.7078	43.4552	44.1913	34.4266	21.4197	25.0013	60.2078	48.8187	49.5265																				40.5637	72.0617	23.1985	3.5244	-17.6833	7.31134	-5.00453	38.955	41.3089	10.0847	-31.5071	-20.0543	92.5242
	240208	720	32.5902	44.3733	25.8334	15.7071	12.4547	28.2453	24.0958	18.182	31.76	54.0258	19.3576	26.5593	30.4114	16.2004	16.3463																				4.21227	41.8907	-17.3934	-49.7741	-60.1741	-9.68098	-22.9498	-41.86	1.55757	72.756	-38.1009	-15.0725	-2.75463
			240214
	MEM+FBS	0	47.1787	38.0874	50.9339	47.2872	33.8987	38.4638	29.4692	53.2299	28.6003
	harvest @ 4°C	30	57.2494	48.4993	43.4798	81.2931	83.5022	96.7181	74.096	67.8108	80.3355																										40.3367	18.8872	6.58289	99.2755	104.691	137.087	81.633	66.226	96.9281
	Store @ rt	60	35.2205	34.9254	25.4832	69.1764	65.8374	56.3343	44.7499	37.4987	21.9502																										-13.6633	-14.3865	-37.5325	69.5735	61.3885	38.0934	9.69628	-8.07855	-46.193
	Image @ 37°C	120	39.1339	41.3001	60.4144	33.9149	34.6742	29.8549	91.5174	110.021	93.2327																										-4.07029	1.23978	48.0952	-16.8636	-15.0024	-26.816	124.339	169.696	128.543
		360	38.6155	44.3571	39.7371	63.4135	42.6339	36.0618	35.5616	31.6515	49.6964				48.9748	57.016	58.3872																				-5.34099	8.73353	-2.59168	55.4467	4.50947	-11.6009	-12.827	-22.412	21.8218				20.0529
	240208	720	30.3427	30.0645	24.8076	22.2819	37.9138	26.6845	32.6525	35.9444	24.027	48.7757	33.031	29.1902																							-25.6203	-26.3024	-39.1887	-45.38	-7.06125	-34.5878	-19.9583	-11.8888	-41.102	19.5649	-19.0303	-28.4454
[truncated: 16 more columns]

## Sheet: Flow Dir
		time																																			% change from baseline (mean)
			220727-28
	Saline-nothing	0	0.943387	0.973395	0.96098	0.925105	0.880789	0.849956	0.893522	0.976713	0.915998	0.905529	0.925123	0.936349	0.944031	0.945693	0.892683
	harvest @ 4°C	30	0.645878	0.704803	0.775383	0.95393	0.923212	0.918653	0.893172	0.894887	0.841793	0.929164	0.906761	0.963819	0.929471	0.93912	0.816221																				-30.1464	-23.7735	-16.1401	3.17026	-0.151965	-0.644998	-3.40086	-3.21536	-8.9576	0.491792	-1.93111	4.23986	0.524951
	Store @ 4°C	60	0.884768	0.883021	0.908142	0.495129	0.438509	0.220385	0.970405	0.834645	0.932025	0.953398	0.834748	0.944204	0.947621	0.932622	0.898327																				-4.30976	-4.49869	-1.78175	-46.4503	-52.5739	-76.1648	4.95213	-9.7307	0.801211	3.11277	-9.71955	2.11841	2.48795
	Image @ 37°C	120	0.0534951	0.131203	0.136195	0.297181	0.0223848	0.282856	0.177573	0.197411	0.0714583	0.651056	0.530599	0.602998	0.966752	0.914768	0.892969																				-94.2144	-85.81	-85.2701	-67.859	-97.579	-69.4083	-80.7949	-78.6494	-92.2716	-29.5864	-42.6141	-34.7841	4.557
		360	0.195453	0.297619	0.403165	0.0529316	0.146467	0.128382	0.93843	0.468449	0.639606	0.122813	0.136855	0.265455	0.18092	0.106626	0.069713																				-78.8612	-67.8117	-56.3965	-94.2753	-84.1592	-86.1151	1.49392	-49.3358	-30.8248	-86.7174	-85.1987	-71.2903	-80.4329
	221117	720	0.0928051	0.0829837	0.0976988	0.0303254	0.24188	0.0330463	0.136795	0.0266297	0.149671	0.162263	0.109681	0.342144	0.454271	0.264362	0.134841																				-89.9629	-91.0251	-89.4336	-96.7202	-73.84	-96.4259	-85.2052	-97.1199	-83.8126	-82.4507	-88.1377	-62.9962	-50.8692
			220105-6								220119-20												220216-17
	Saline-nothing	0									0.81245	0.965219	0.949992		0.975115	0.961982	0.99357	0.929611	0.984082	0.972346	0.959569	0.959339	0.925973	0.870924	0.961923
	harvest @ 4°C	30	0.923379	0.965513	0.906197	0.946393	0.922305	0.872059	0.891429	0.919987	0.897913	0.958409	0.903097	0.944091	0.770917	0.932035	0.942447		0.972736	0.979173	0.928579	0.992894	0.961462	0.96384	0.983931												-2.22952	2.23174	-4.04877	0.207252	-2.34322	-7.66346	-5.6125	-2.58872	-4.92598	1.47961	-4.377	-0.0365164	-18.3728
	Store @ rt	60	0.123058	0.275286	0.306582	0.133396	0.785081	0.826172	0.75427	0.780117	0.723478	0.973568	0.942729	0.954697	0.296379	0.21142	0.329785	0.205872	0.952344	0.830908	0.927101		0.940211	0.899127	0.890139												-86.9702	-70.8518	-67.5381	-85.8756	-16.873	-12.5221	-20.1354	-17.3986	-23.3957	3.08469	-0.180682	1.08656	-68.6184
	Image @ 37°C	120	0.562257	0.0942761	0.290195	0.291643	0.486975	0.786513	0.662385	0.427616	0.917009	0.954555	0.928624	0.975822	0.976742	0.884347	0.982951	0.868581	0.907006	0.936038	0.911838	0.87966	0.868298	0.988958	0.922755												-40.4663	-90.0177	-69.2732	-69.1198	-48.4375	-16.7213	-29.8645	-54.7226	-2.90398	1.07148	-1.67418	3.32328	3.4207
		360	0.373345	0.240044	0.151345	0.19458	0.209147	0.30524	0.0665934	0.19606	0.274087	0.0595869	0.177229	0.128596	0.429186	0.253329	0.0400536																				-60.469	-74.5834	-83.9751	-79.3972	-77.8548	-67.6801	-92.9489	-79.2405	-70.9787	-93.6907	-81.2344	-86.3838	-54.5563
	221117	720	0.104394	0.232117	0.1621	0.228509	0.0675287	0.181802	0.385775	0.164581	0.0587695	0.268898	0.313593	0.0334556	0.207268	0.242011	0.109068																				-88.9464	-75.4227	-82.8363	-75.8047	-92.8498	-80.7501	-59.1528	-82.5736	-93.7773	-71.5282	-66.7957	-96.4576	-78.0537
			221028
	HBSS-nothing-no bicarb	0	0.983224	0.967551	0.979681	0.953202	0.97558	0.984425	0.968289	0.949641	0.965118	0.958444	0.977497	0.973944	0.972093	0.963345	0.969427
	harvest @ 4°C	30	0.937703	0.95301	0.953921	0.933786	0.917688	0.98228	0.958241	0.917661	0.956148	0.949878	0.940931	0.97207	0.933814	0.958917	0.971998																				-3.27284	-1.69383	-1.59985	-3.67687	-5.33741	1.32546	-1.15422	-5.34021	-1.37021	-2.01692	-2.93988	0.272239	-3.67396
	Store @ 4°C	60	0.954159	0.95559	0.90944	0.89702	0.946227	0.895256	0.931587	0.921964	0.92829	0.93011	0.977075	0.964951	0.934021	0.972449	0.937241																				-1.5753	-1.42769	-6.18822	-7.46938	-2.39352	-7.65143	-3.90371	-4.89633	-4.24384	-4.05603	0.788575	-0.462078	-3.65266
	Image @ 37°C	120	0.916243	0.917469	0.962454	0.870172	0.922157	0.862793	0.903948	0.97405	0.871294	0.885024	0.936159	0.895085	0.964736	0.981411	0.932794																				-5.48651	-5.36001	-0.719671	-10.2389	-4.87643	-11.0001	-6.75479	0.476496	-10.1232	-8.7068	-3.43212	-7.66904	-0.484296
		360	0.914915	0.94387	0.917372	0.960436	0.976985	0.952936	0.909488	0.964925	0.95208	0.905104	0.960163	0.922748	0.881513	0.882348	0.904667																				-5.62345	-2.63671	-5.37005	-0.927818	0.779198	-1.70144	-6.18333	-0.464785	-1.7898	-6.6355	-0.955984	-4.81546	-9.06896
	221129	720	0.888292	0.941191	0.934695	0.954006	0.978428	0.952066	0.915198	0.93721	0.935722	0.922685	0.973226	0.967599	0.943586	0.882289	0.82286																				-8.36976	-2.91307	-3.58307	-1.59114	0.928049	-1.79119	-5.59434	-3.32364	-3.47712	-4.82202	0.391505	-0.188923	-2.66596
			221027
	HBSS-nothing-no bicarb	0	0.949065	0.927024	0.948083	0.982377	0.961811	0.970186	0.943344	0.923172	0.975177	0.958432	0.966235	0.872694	0.885703	0.983419	0.950864
	harvest @ 4°C	30	0.951893	0.973555	0.981826	0.914811	0.958867	0.976961	0.976106	0.96073	0.956838	0.949826	0.866052	0.864328	0.960607	0.935123	0.962237																				0.569229	2.85779	3.73163	-3.34856	1.30597	3.21768	3.12731	1.50282	1.09168	0.35081	-8.50011	-8.6822	1.4898
	Store @ rt	60	0.902499	0.933809	0.956344	0.97221	0.926004	0.946365	0.97399	0.932596	0.954557	0.955097	0.898289	0.971384	0.780715	0.918957	0.888498																				-4.64939	-1.34148	1.03944	2.71573	-2.16605	-0.0148355	2.90377	-1.46963	0.850665	0.907682	-5.09422	2.6284	-17.5161
	Image @ 37°C	120	0.962963	0.922379	0.979528	0.960889	0.963707	0.904837	0.948301	0.96853	0.958752	0.949071	0.962139	0.915492	0.954352	0.858446	0.802334																				1.73879	-2.54907	3.48886	1.51961	1.81737	-4.40236	0.189715	2.32688	1.29387	0.271037	1.65166	-3.27666	0.828984
		360	0.959545	0.966713	0.979672	0.961746	0.949569	0.958137	0.959075	0.962357	0.967755	0.903622	0.970055	0.975434	0.951574	0.972089	0.96368																				1.37766	2.13491	3.50412	1.61013	0.323606	1.2289	1.32802	1.67474	2.24504	-4.53071	2.48808	3.05638	0.535513
	221129	720	0.937429	0.946417	0.857298	0.900417	0.960175	0.973259	0.958562	0.975983	0.947154	0.9053	0.956979	0.926067	0.962447	0.966361	0.970636																				-0.959008	-0.00939981	-9.42492	-4.86932	1.44418	2.82657	1.27382	3.11435	0.068462	-4.35348	1.10653	-2.15943	1.68421
			240313															240321-22
	HBSS+FBS-no bicarb	0	0.971515	0.980348	0.958933	0.949516	0.957047	0.962291	0.943866	0.959045	0.94663	0.982122	0.988218	0.981835	0.967928	0.961071	0.973526	0.968179	0.985578	0.976198	0.992774	0.983655	0.989595	0.967347	0.943474	0.964817
	harvest @ 4°C	30	0.990194	0.973523	0.943871	0.974934	0.942938	0.935593	0.963398	0.974168	0.977442	0.97476	0.98238	0.985098	0.957853	0.966938	0.938315	0.910049	0.954421	0.984166	0.976356	0.99195	0.98269	0.956775	0.954799	0.971473											2.18942	0.468875	-2.59126	0.614471	-2.68753	-3.44553	-0.576003	0.535477	0.873337	0.596575	1.38291	1.66345	-1.14829
	Store @ 4°C	60	0.978655	0.933881	0.991537	0.946172	0.959937	0.921315	0.93456	0.951267	0.985952	0.968354	0.965033	0.935735	0.918021	0.961034	0.980066	0.976567	0.98001	0.945033	0.987866	0.976422	0.975143	0.958396	0.974352	0.965896											0.998566	-3.62225	2.32801	-2.35372	-0.933242	-4.91903	-3.5521	-1.82796	1.75163	-0.0645502	-0.407317	-3.4309	-5.25897
	Image @ 37°C	120	0.957641	0.976392	0.968221	0.939946	0.989195	0.978367	0.91252	0.90021	0.947799	0.93113	0.927382	0.936455	0.957467	0.959937	0.940556	0.980304	0.952557	0.981259	0.960354	0.978476	0.988931	0.928672	0.957077	0.93008											-1.17018	0.764979	-0.0782743	-2.99634	2.0863	0.968846	-5.82674	-7.09711	-2.18583	-3.90607	-4.29288	-3.35656	-1.18814
		360	0.979001	0.964275	0.977643	0.978147	0.956881	0.970961	0.948494	0.953744	0.920163	0.940888	0.96388	0.971853	0.981204	0.974166	0.973333																				1.03422	-0.48547	0.894044	0.946118	-1.24861	0.204519	-2.11409	-1.57236	-5.03796	-2.8991	-0.526237	0.296524	1.26157
	240229	720	0.95784	0.926164	0.943812	0.888314	0.850578	0.903521	0.912169	0.962001	0.958619	0.942142	0.926042	0.886765	0.89988	0.858152	0.906287																				-1.14959	-4.41859	-2.59736	-8.32474	-12.2192	-6.75542	-5.86295	-0.720234	-1.06924	-2.76965	-4.43124	-8.48469	-7.13118
			240305-07
	HBSS+FBS-no bicarb	0	0.972709	0.967362	0.986373	0.972245	0.944068	0.914273	0.966992	0.974812	0.953027	0.958097	0.923975	0.95061	0.976176	0.980029	0.983776
	harvest @ 4°C	30	0.981776	0.976399	0.987644	0.929673	0.951101	0.930455	0.979247	0.988945	0.98431	0.980575	0.966356	0.958536	0.990021	0.96405	0.965976																				2.09447	1.53529	2.70467	-3.32372	-1.09543	-3.24239	1.83147	2.83993	2.35797	1.96956	0.490979	-0.322286	2.95191
	Store @ rt	60	0.966298	0.968097	0.966759	0.968136	0.983749	0.985848	0.979368	0.988915	0.981721	0.966806	0.955196	0.950513	0.963215	0.929745	0.989915																				0.484898	0.67204	0.532888	0.676097	2.29967	2.51789	1.84406	2.8368	2.08873	0.537703	-0.669615	-1.15656	0.164354
	Image @ 37°C	120	0.972776	0.989138	0.980581	0.993491	0.991094	0.98316	0.988428	0.978642	0.986018	0.965986	0.965152	0.97151	0.931855	0.951326	0.957126																				1.15853	2.86005	1.97019	3.31269	3.06339	2.23841	2.78618	1.76853	2.53557	0.452473	0.365753	1.02692	-3.09682
		360	0.963988	0.948767	0.967675	0.9745	0.982146	0.971969	0.944144	0.928532	0.945066	0.899913	0.903088	0.975235	0.928449	0.982404	0.973554																				0.244698	-1.33811	0.628134	1.33781	2.13298	1.07469	-1.81883	-3.44233	-1.72296	-6.41847	-6.08832	1.41426	-3.45095
	240229	720	0.941748	0.913763	0.931241	0.991825	0.956411	0.95011	0.903355	0.897342	0.854453	0.94745	0.963145	0.929648	0.967672	0.965778	0.967565																				-2.06806	-4.97819	-3.1607	3.13949	-0.543272	-1.1985	-6.06052	-6.68576	-11.1458	-1.47511	0.157074	-3.32633	0.627771
	HBSS-FBS+bicard no co2	0
	harvest @ 4°C	30
	Store @ rt	60
	Image @ 37°C	120
			220715
	RPMI-nothing	0	0.927608	0.946682	0.934365	0.911799	0.964783	0.927658				0.97102	0.985638	0.931825	0.898589	0.882737	0.921719	0.88581
	harvest @ 4°C	30	0.933671	0.943923	0.948367	0.957938	0.906442	0.931193	0.976973	0.949764	0.977322	0.937952	0.972568	0.93957	0.919541	0.948971	0.911536																				0.392833	1.49514	1.97296	3.00209	-2.53503	0.126369	5.04889	2.12323	5.08634	0.853129	4.57522	1.02707	-1.12648
	Store @ 4°C	60	0.934054	0.950454	0.918263	0.977728	0.956246	0.97947	0.916369	0.984834	0.979696	0.960324	0.970197	0.942111	0.93499	0.981387	0.939929																				0.434018	2.19745	-1.26391	5.12999	2.82015	5.31733	-1.46756	5.89414	5.34165	3.25866	4.32027	1.30028	0.534642
	Image @ 37°C	120	0.868357	0.955644	0.988487	0.94883	0.981262	0.946701	0.953105	0.952294	0.871473	0.918758	0.850973	0.810191	0.945274	0.938729	0.921151																				-6.63012	2.7555	6.28693	2.02273	5.50997	1.79383	2.48248	2.39526	-6.29498	-1.21066	-8.49933	-12.8843	1.64037
		360	0.926205	0.899884	0.946193	0.822075	0.919779	0.911786	0.976281	0.977062	0.942769	0.960164	0.936191	0.972038	0.963774	0.992854	0.947147																				-0.409978	-3.24015	1.7392	-11.6065	-1.10098	-1.96032	4.97446	5.05838	1.37104	3.2415	0.66375	4.51824	3.62965
	221123	720	0.979759	0.929125	0.944988	0.898691	0.930574	0.92402	0.982964	0.990927	0.947048	0.810873	0.94731	0.885343	0.985015	0.986776	0.949575																				5.34841	-0.0959553	1.60967	-3.36846	0.059799	-0.644893	5.69304	6.54921	1.83112	-12.811	1.85936	-4.8037	5.9136
			220119-20							220202-04				220209-10							220216-17
	RPMI-nothing	0	0.85983	0.918937	0.83877	0.938809	0.988765	0.973627	0.868619	0.931936	0.963905	0.968279		0.983684	0.974406	0.973438		0.906053	0.950692	0.921547	0.937896	0.972283	0.969925
	harvest @ 4°C	30	0.968289	0.943952	0.947746	0.942545	0.908131	0.921619		0.977957	0.970484	0.980607		0.931178	0.918257	0.856812		0.988066	0.985727	0.956589	0.920944	0.962019	0.940568														3.11684	0.525122	0.929141	0.375308	-3.28957	-1.85327		4.14644	3.35061	4.42867		-0.835272	-2.21131
	Store @ rt	60	0.925942	0.974986	0.960276	0.957881	0.976996	0.920859		0.996504	0.99475	0.997488	0.981283	0.964761	0.972778	0.932248		0.929546	0.933479	0.980422	0.932252	0.93738	0.930612	0.939767													-1.3928	3.83005	2.26356	2.00846	4.04411	-1.9342		6.12152	5.93479	6.22635	4.50067	2.74109	3.59487
	Image @ 37°C	120	0.896524	0.945626	0.95398	0.961273	0.984231	0.990433		0.945636	0.985973	0.98069		0.983403	0.989987	0.965804	0.995359	0.906288	0.949899	0.973352	0.940324	0.980521	0.984659														-4.52565	0.703382	1.59306	2.36969	4.81459	5.47505		0.704467	5.00003	4.43749		4.72636	5.42758
		360	0.933503	0.938179	0.965275	0.973877	0.927283	0.916249	0.964706	0.973302	0.982301	0.941006	0.934766	0.903025	0.968343	0.981076	0.971558																				-0.587682	-0.0897246	2.79593	3.7119	-1.25008	-2.42513	2.73532	3.65071	4.60904	0.211354	-0.453105	-3.83337	3.12256
	221123	720	0.969342	0.928775	0.938784	0.924373	0.952844	0.850737	0.979591	0.973786	0.954984	0.938507	0.900643	0.972769	0.936272	0.977453	0.976131																				3.22895	-1.09116	-0.0252023	-1.55993	1.4721	-9.40175	4.32048	3.70229	1.7	-0.0547001	-4.087	3.59394	-0.292763
			230629-30
	RPMI+FBS	0	0.987567	0.972586	0.983321	0.982453	0.955862	0.957839	0.926174	0.952353	0.981496	0.966685	0.963297	0.963644	0.929474	0.944121	0.960894
	harvest @ 4°C	30	0.930275	0.940377	0.976152	0.985702	0.973404	0.902743	0.934033	0.919082	0.929572	0.969089	0.986379	0.968799	0.951087	0.963331	0.955625																				-3.28281	-2.23253	1.48678	2.47968	1.20106	-6.14529	-2.8921	-4.4465	-3.35593	0.752526	2.5501	0.722323	-1.11909
	Store @ 4°C	60	0.923728	0.971623	0.971123	0.957568	0.966204	0.940057	0.982151	0.988599	0.937121	0.956332	0.964106	0.967307	0.92836	0.943616	0.974077																				-3.96352	1.01596	0.96393	-0.445252	0.452555	-2.26583	2.11051	2.78089	-2.57111	-0.573824	0.234421	0.567185	-3.48197
	Image @ 37°C	120	0.970219	0.994602	0.974291	0.981961	0.964336	0.990379	0.935652	0.972323	0.968306	0.938016	0.953377	0.941335	0.943193	0.948367	0.970483																				0.869934	3.40495	1.29329	2.09072	0.258307	2.96594	-2.72384	1.08873	0.671142	-2.47805	-0.881051	-2.133	-1.9398
		360	0.976624	0.976856	0.97415	0.965136	0.988272	0.956032				0.946035	0.927139	0.941614	0.946737	0.902332	0.954876																				1.53591	1.56006	1.27865	0.341506	2.74685	-0.605007				-1.64429	-3.60885	-2.10396	-1.57138
	230721	720	0.938072	0.974801	0.97796	0.951545	0.899913	0.910213	0.961448	0.945836	0.961977				0.947935	0.920433	0.95984																				-2.4722	1.34631	1.67481	-1.07153	-6.4395	-5.36863	-0.0418904	-1.66498	0.0131103				-1.44677
			230621-23
	RPMI+FBS	0	0.984074	0.990338	0.983831	0.979086	0.977825	0.976813	0.986538	0.992836	0.977578	0.987834	0.983341	0.968933		0.979928	0.995569	0.951867
	harvest @ 4°C	30	0.89916	0.836425	0.877061	0.976711	0.967294	0.954374	0.986091	0.98948	0.982201	0.962904	0.970293	0.981161	0.966251	0.969776	0.959181	0.960612																			-8.35122	-14.7456	-10.6037	-0.446608	-1.40648	-2.72332	0.509415	0.85489	0.112943	-1.85391	-1.10081	0.00694876	-1.51278
	Store @ rt	60	0.979022	0.970238	0.963545	0.966577	0.967493	0.979755	0.870655	0.938991	0.935549	0.967907	0.981815	0.987111	0.96123	0.989414	0.979459	0.991509																			-0.211028	-1.10642	-1.78859	-1.47951	-1.38616	-0.136321	-11.2566	-4.2913	-4.64215	-1.34394	0.073623	0.613427	-2.02456
	Image @ 37°C	120	0.980946	0.954033	0.976018	0.978418	0.979545	0.974277	0.94005	0.951474	0.957094	0.976979	0.971009	0.975949	0.946395	0.9868	0.97995	0.972462																			-0.0150078	-2.75811	-0.517268	-0.272646	-0.157716	-0.694694	-4.18342	-3.019	-2.44616	-0.419275	-1.02776	-0.524294	-3.5366
		360	0.992766	0.933039	0.962132				0.971311	0.977745	0.969959	0.876586	0.881415	0.874352	0.889603	0.83318	0.897358																				1.18985	-4.89795	-1.93262				-0.996996	-0.341229	-1.13484	-10.652	-10.1598	-10.8798	-9.32525
	230721	720	0.863977	0.91588	0.876433	0.963891	0.974809	0.988089	0.951246	0.961853	0.940431	0.946944	0.892338	0.978002																							-11.9373	-6.64694	-10.6676	-1.75328	-0.640472	0.713137	-3.04216	-1.96102	-4.14457	-3.48065	-9.04655	-0.314993
			221005-07
	DPBS-nothing	0	0.909489	0.979185	0.941117	0.864312	0.977258	0.900115	0.979602	0.986673	0.972017	0.979273	0.965969	0.88125	0.86516	0.951666	0.985849	0.971251
	harvest @ 4°C	30	0.950642	0.938491	0.967782	0.874652	0.944035	0.952184	0.933017	0.965398	0.959694		0.986146	0.984744	0.978624	0.92154	0.951279	0.923098																			0.662378	-0.624226	2.47731	-7.38411	-0.0372572	0.825669	-1.20392	2.22485	1.62084		4.42183	4.27338	3.6254
	Store @ 4°C	60	0.889409	0.909501	0.952166	0.93804	0.980208	0.976885	0.870112	0.88333	0.920438		0.902232	0.922287	0.984459	0.983175	0.971274	0.983846																			-5.82152	-3.69403	0.823734	-0.672015	3.79311	3.44123	-7.86489	-6.46519	-2.53589		-4.46367	-2.3401	4.24318
	Image @ 37°C	120	0.905853	0.912569	0.9258	0.933621	0.925515	0.934703	0.954936	0.977694	0.933226		0.821314	0.871763	0.859038	0.964233	0.920048	0.976126																			-4.08031	-3.36909	-1.96813	-1.13994	-1.99832	-1.02537	1.11706	3.52688	-1.18182		-13.032	-7.68998	-9.03742
		360	0.911387	0.936765	0.959424	0.861638	0.487646	0.687839				0.925193	0.963653	0.922767	0.868306	0.810142	0.882378																				-3.49426	-0.807042	1.5923	-8.76215	-48.3637	-27.1655				-2.03238	2.04014	-2.28926	-8.05603
	221103	720	0.944407	0.993384	0.974468	0.899045	0.860188	0.965464				0.921522	0.96337	0.969668	0.84117	0.854841	0.908687																				0.00221499	5.18832	3.18528	-4.80116	-8.91569	2.23185				-2.42115	2.01008	2.677	-10.9295
			220112-13												220209-10
	DPBS-nothing	0	0.923838	0.99245	0.963392	0.928953	0.982047	0.976566	0.963263	0.931558	0.82072	0.802402	0.913445	0.972593	0.97254	0.987768	0.984002	0.977709	0.928622	0.920817	0.889839		0.858563	0.822108	0.914455
	harvest @ 4°C	30	0.921012	0.844789	0.903734						0.938199	0.891549	0.889738		0.826451	0.95137	0.943425		0.956994	0.972207	0.950075		0.982341	0.979977	0.978089												-0.809629	-9.01867	-2.6704						1.04139	-3.98265	-4.17769		-10.9936
	Store @ rt	60	0.98893	0.958185	0.96407		0.978698	0.986891	0.957794		0.857245	0.890087	0.88737	0.971747	0.909513	0.944358	0.941861		0.965085	0.979241	0.976023	0.969759	0.92442	0.972621	0.954775												6.50492	3.19387	3.82766		5.40304	6.28532	3.15172		-7.67713	-4.1401	-4.43276	4.65441	-2.04801
	Image @ 37°C	120	0.952718	0.914773	0.932494	0.994091	0.939671	0.943133	0.907784	0.893576	0.9445	0.963387	0.961281	0.977608	0.964686	0.985422	0.98352		0.991169	0.964336	0.985244		0.954725	0.994364	0.958773												2.60503	-1.48153	0.426918	7.06083	1.19992	1.57279	-2.23426	-3.76442	1.72001	3.75409	3.52725	5.28561	3.89397
		360	0.957155	0.992145	0.986507	0.949752	0.970702	0.973466	0.971041	0.964643	0.975405	0.976849	0.952252	0.987888	0.966828	0.98042	0.960502																				3.0829	6.85117	6.24405	2.28561	4.54191	4.83951	4.57841	3.88932	5.04832	5.20392	2.5548	6.39278	4.12465
	221103	720	0.984997	0.982903	0.974883	0.922156	0.958921	0.940596	0.947482	0.942409	0.919647	0.904215	0.936351	0.942397	0.921618	0.913598	0.928787																				6.08134	5.8559	4.99213	-0.686435	3.27309	1.29957	2.04114	1.49477	-0.95663	-2.6186	0.84231	1.49354	-0.744366
			231129
	DPBS+FBS	0	0.795801	0.881431	0.87147	0.960066	0.956213	0.979561	0.919591	0.973988	0.917428	0.960374	0.957983	0.953332	0.987653	0.974869	0.978513
	harvest @ 4°C	30	0.628912	0.754787	0.830461	0.985762	0.995839	0.992926	0.953558	0.976036	0.966726	0.95943	0.958226	0.96898	0.979141	0.969142	0.967634																				-32.9436	-19.5224	-11.4539	5.10484	6.17923	5.86869	1.67113	4.06774	3.07517	2.29717	2.16887	3.31541	4.39882
	Store @ 4°C	60	0.935789	0.923102	0.959505	0.90807	0.959733	0.931878	0.903828	0.94846	0.944389	0.941963	0.965544	0.9472	0.959012	0.95778	0.914397																				-0.223423	-1.57623	2.30524	-3.17898	2.32948	-0.640418	-3.63128	1.12751	0.693493	0.434802	2.94909	0.993251	2.25268
	Image @ 37°C	120	0.960878	0.963641	0.889485	0.993494	0.991444	0.969506	0.962963	0.934942	0.95762	0.990018	0.976726	0.974799	0.933956	0.960104	0.931277																				2.45164	2.74619	-5.16053	5.92921	5.71066	3.37155	2.6739	-0.313802	2.10423	5.55854	4.14137	3.93587	-0.4189
		360	0.932817	0.964483	0.912723	0.927646	0.918142	0.88366	0.968443	0.955505	0.972506	0.892447	0.946322	0.946457	0.994959	0.96365	0.963665																				-0.540323	2.83602	-2.68285	-1.09168	-2.10502	-5.78156	3.2582	1.8787	3.69145	-4.84476	0.899546	0.913976	6.08544
	230728	720	0.934899	0.898998	0.958094	0.839107	0.877017	0.780796	0.927239	0.917707	0.842711	0.956384	0.940398	0.951631	0.83654	0.947418	0.957369																				-0.318362	-4.14619	2.15479	-10.5319	-6.48991	-16.7492	-1.13513	-2.15146	-10.1477	1.97242	0.267972	1.46569	-10.8056
			231122-23
	DPBS+FBS	0	0.980951	0.957435	0.982434	0.955223	0.953041	0.959482	0.930609	0.945394	0.888021	0.921384	0.898519	0.952269	0.836963	0.923523	0.836576
	harvest @ 4°C	30	0.958358	0.948553	0.983532	0.961986	0.946903	0.956397	0.971239	0.868727	0.962882	0.916168	0.951919	0.905576	0.932228	0.903958	0.884942																				3.25777	2.20138	5.97019	3.64873	2.02363	3.04658	4.64569	-6.39945	3.74529	-1.28794	2.56407	-2.42918	0.442467
	Store @ rt	60	0.939458	0.966039	0.939742	0.952851	0.931904	0.960786	0.89066	0.957854	0.924974	0.927993	0.910254	0.895905	0.965077	0.954528	0.987919																				1.22148	4.08542	1.252	2.66445	0.407519	3.51946	-4.03632	3.20347	-0.339081	-0.0138767	-1.92507	-3.47118	3.98172
	Image @ 37°C	120	0.956447	0.971427	0.886997	0.939842	0.944405	0.894823	0.957944	0.921024	0.97985	0.88208	0.95002	0.866669	0.976617	0.948887	0.96983																				3.0519	4.66595	-4.43094	1.26286	1.75444	-3.58774	3.2132	-0.764739	5.57342	-4.96072	2.35943	-6.62119	5.22514
		360	0.975913	0.987399	0.955553	0.962017	0.962321	0.963246	0.9715	0.915885	0.983611	0.839772	0.860465	0.952885	0.985966	0.949808	0.963439																				5.14932	6.38683	2.95559	3.6521	3.68481	3.78444	4.67383	-1.31843	5.97865	-9.51919	-7.2896	2.6681	6.23248
	230728	720	0.899626	0.969614	0.950065	0.978959	0.93211	0.98032	0.956045	0.975953	0.978005	0.968024	0.951504	0.882446	0.980696	0.979695	0.778906																				-3.0702	4.47064	2.36425	5.47751	0.42977	5.62414	3.00859	5.15358	5.37471	4.29933	2.51931	-4.92125	5.66463
	DPBS-nothing-w/o CaMg	0
	harvest @ 4°C	30
	Store @ 4°C	60
	Image @ 37°C	120
		360
		720
	DPBS-nothing-w/o CaMg	0
	harvest @ 4°C	30
	Store @ rt	60
	Image @ 37°C	120
		360
		720
			220622-23									230615									240327-28
	L15-nothing	0	0.950029	0.923057	0.965177	0.951795	0.84542	0.979472	0.973466	0.951674	0.961645	0.970299	0.995578	0.994214	0.960446	0.890136	0.87	0.969769	0.955711	0.978597	0.956569	0.982945	0.980291	0.958159	0.961058	0.975599
	harvest @ 4°C	30	0.911216	0.930347	0.938398	0.942545	0.922621	0.955532	0.929541	0.950935	0.922525	0.977855	0.977618	0.976675	0.967995	0.980636	0.930854	0.962723	0.966846	0.975132	0.939786	0.942133	0.958195	0.933959	0.909071	0.918424											-4.50599	-2.50111	-1.65735	-1.22278	-3.31073	0.138275	-2.58556	-0.343454	-3.32077	2.4777	2.45281	2.35401	1.4444
	Store @ 4°C	60	0.915393	0.921391	0.823059	0.959576	0.929244	0.907058	0.892745	0.954801	0.914157	0.967408	0.909655	0.967588	0.98248	0.977745	0.954036	0.928853	0.930938	0.969909	0.915885	0.979457	0.954043	0.94891	0.9391	0.936937											-4.06819	-3.43967	-13.7447	0.562044	-2.6167	-4.94171	-6.44173	0.0616263	-4.19779	1.38288	-4.66956	1.40173	2.96237
	Image @ 37°C	120	0.908184	0.913225	0.970732	0.882231	0.865674	0.904529	0.932544	0.975104	0.926063	0.880693	0.868307	0.914695	0.975759	0.937751	0.934055	0.942615	0.972667	0.956868	0.90494	0.920363	0.966373	0.83878	0.861501	0.940308											-4.82378	-4.2954	1.73117	-7.54356	-9.27871	-5.20673	-2.27084	2.18934	-2.95008	-7.70471	-9.00284	-4.14142	2.25798
		360	0.956574	0.85052	0.984696	0.935073	0.941615	0.926272	0.921161	0.861638	0.917144	0.880539	0.814982	0.841947	0.943138	0.920718	0.827254																				0.247485	-10.8668	3.19463	-2.0058	-1.32025	-2.92818	-3.46372	-9.70173	-3.88476	-7.72084	-14.5912	-11.7652	-1.16065
	221121	720	0.895617	0.882927	0.904423	0.986553	0.981432	0.973998	0.888926	0.922135	0.845785	0.876367	0.91362	0.955149	0.929631	0.877201	0.957212																				-6.14073	-7.47067	-5.21784	3.38924	2.85254	2.07346	-6.84199	-3.3617	-11.3631	-8.15808	-4.2541	0.098159	-2.57611
			220126-27								220202-04															240327-28
	L15-nothing	0	0.890027	0.927473	0.986663		0.976035	0.994961	0.962878	0.985788	0.925929	0.951123	0.948386	0.88485	0.98464	0.962119	0.699898		0.933995	0.920495	0.877344	0.938178	0.957136	0.880726	0.988758	0.946158	0.969017	0.944975	0.965699	0.949203	0.932042
	harvest @ 4°C	30	0.90443	0.956639	0.886451		0.917451	0.90006	0.961986		0.88593	0.976028	0.927538		0.9309	0.93925	0.906963		0.92661	0.926328	0.957994	0.879324	0.921039	0.967187		0.905051	0.889756	0.948163	0.947414	0.967146	0.920844						-3.42061	2.15453	-5.34048		-2.03016	-3.8873	2.72553		-5.39611	4.225	-0.953		-0.594
	Store @ rt	60	0.923249	0.919087	0.921469		0.952826	0.859336	0.92055						0.904738	0.925767	0.933602		0.934177	0.794696	0.926959	0.913577	0.948437	0.941778	0.971859	0.932766	0.850761	0.945686	0.938122	0.897843	0.950303						-1.41103	-1.85547	-1.60112		1.74733	-8.23597	-1.6993						-3.38778
	Image @ 37°C	120	0.68072	0.905108	0.885589	0.886949	0.860477	0.989602	0.964994		0.835794	0.880593	0.844243		0.823682	0.931067	0.971485	0.813533	0.888323	0.976906	0.957067	0.910977	0.87184	0.970728	0.948631	0.908441	0.930719	0.941382	0.948367	0.921265	0.95421						-27.3095	-3.34827	-5.43256	-5.28736	-8.11414	5.67444	3.04668		-10.7499	-5.96606	-9.84767		-12.0433
		360	0.901325	0.928927	0.93836	0.92507	0.96321	0.974922	0.984472	0.980438	0.923668	0.872799	0.945061	0.889794	0.94518	0.936211	0.954598																				-3.75221	-0.804699	0.202555	-1.21659	2.85623	4.1068	5.12666	4.69584	-1.36629	-6.7983	0.918168	-4.98358	0.930851
	221121	720	0.927627	0.907101	0.96682	0.933794	0.954365	0.91087	0.940944	0.913728	0.8601	0.913025	0.927692	0.956917	0.917865	0.947251	0.954183																				-0.943528	-3.13538	3.24165	-0.28501	1.91166	-2.7329	0.478496	-2.42772	-8.15442	-2.50279	-0.936601	2.18421	-1.98598
	L15-nothing	0
	harvest @ 4°C	30
	Store @ 37	60
	Image @ 37°C	120
		360
		720
			220622-23							220721-22
	L15 + FBS	0	0.953696	0.993166	0.926757	0.955128	0.93148	0.953133	0.991123	0.933555	0.95138	0.910449	0.980673	0.982427	0.974872	0.950773	0.978213	0.985761	0.953069	0.887441	0.961881	0.965599
	harvest @ 4°C	30	0.713933	0.851004	0.813425		0.971647	0.943769	0.886252	0.95983	0.975091	0.974314	0.982343	0.938773	0.96517		0.988624	0.968704	0.975588	0.893124	0.966036	0.937528															-25.323	-10.9856	-14.9163		1.63369	-1.28236	-7.29863	0.397611	1.99392	1.91262	2.75249	-1.80491	0.956172
	Store @ 4°C	60	0.913077	0.95776	0.971231		0.947715	0.951707	0.977595	0.961343	0.949869	0.96082	0.969597	0.916253	0.903664		0.972541	0.964481	0.990399	0.967807	0.969546	0.986449															-4.49273	0.181081	1.59014		-0.869585	-0.452096	2.2558	0.555857	-0.644268	0.501148	1.41924	-4.16048	-5.47731
	Image @ 37°C	120	0.889451	0.917677	0.950554		0.936553	0.987111	0.962566	0.877617	0.975809	0.942857	0.95993	0.917004	0.979633		0.955595	0.950625	0.955392	0.939581	0.906214	0.912696															-6.96395	-4.0116	-0.572614		-2.03716	3.25121	0.683807	-8.20184	2.06906	-1.37778	0.408077	-4.08192	2.46897
		360	0.970056	0.961678	0.970582	0.957921	0.901322	0.953812	0.982397	0.95336	0.977386	0.960801	0.916778	0.961905	0.983904	0.962279	0.965854																				1.46727	0.590877	1.52231	0.197903	-5.7223	-0.231893	2.75815	-0.279101	2.23401	0.499151	-4.1056	0.614673	2.91574
	221122	720	0.929357	0.877267	0.912642	0.960924	0.968739	0.948431	0.98733	0.959818	0.970986	0.964281	0.933499	0.964836	0.936462	0.924987	0.968031																				-2.78982	-8.23843	-4.53824	0.512039	1.32953	-0.794705	3.27414	0.396346	1.5645	0.863168	-2.35663	0.921215	-2.04667
			220629-30															240321-22
	L15 + FBS	0	0.916001	0.975036	0.868403	0.919418	0.939056	0.961889	0.991098	0.95163	0.98823	0.935368	0.912843	0.9288	0.944778	0.921322	0.957685	0.97507	0.982223	0.950586	0.985757	0.974304	0.991586
	harvest @ 4°C	30	0.983843	0.97959	0.980068	0.972395	0.982349	0.889366	0.970798	0.977338	0.98195	0.967124	0.944658	0.970001	0.928054	0.922135	0.890657	0.941995	0.966301	0.972347	0.964752	0.933235	0.964402														3.45311	3.00586	3.05616	2.24934	3.29599	-6.48139	2.08134	2.76902	3.25404	1.69506	-0.667301	1.99761	-2.4132
	Store @ rt	60	0.884089	0.914554	0.910669	0.974105	0.986138	0.960199	0.971088	0.974006	0.995406	0.960465	0.962777	0.960256	0.943844	0.985084	0.947841	0.992941	0.963993	0.984614	0.910674	0.973361	0.98843														-7.03624	-3.8328	-4.24135	2.4291	3.69443	0.966904	2.11186	2.41873	4.66895	0.994864	1.23798	0.972856	-0.752856
	Image @ 37°C	120	0.914619	0.963928	0.96194	0.941611	0.974595	0.978647	0.924684	0.943734	0.915271	0.955784	0.958746	0.989462	0.90698	0.976299	0.968385	0.956457	0.975745	0.966901	0.988719	0.991687	0.987968														-3.82599	1.35893	1.14991	-0.98768	2.48067	2.90672	-2.76758	-0.764471	-3.75737	0.502609	0.81411	4.04394	-4.62918
		360	0.986458	0.936104	0.977052	0.981695	0.940992	0.962988	0.974343	0.967538	0.9705	0.974881	0.986705	0.992135	0.981777	0.901389	0.926408																				3.72808	-1.56676	2.73904	3.22724	-1.05273	1.26011	2.45411	1.73859	2.05006	2.51072	3.75408	4.32503	3.23581
	221122	720	0.953643	0.971472	0.948714	0.978696	0.970664	0.985108	0.986922	0.986044	0.969716	0.96001	0.981571	0.995156	0.972585	0.969836	0.983131																				0.277455	2.15226	-0.240753	2.91182	2.06724	3.58608	3.77689	3.68453	1.96755	0.947037	3.2142	4.64269	2.26931
	L15 + FBS	0
	harvest @ 4°C	30
	Store @ 37	60
	Image @ 37°C	120
		360
		720
	M199-nothing	0
	harvest @ 4°C	30																																			#DIV/0!	#DIV/0!	#DIV/0!	#DIV/0!	#DIV/0!	#DIV/0!	#DIV/0!	#DIV/0!	#DIV/0!	#DIV/0!
	Store @ 4°C	60																																			#DIV/0!	#DIV/0!	#DIV/0!	#DIV/0!	#DIV/0!	#DIV/0!	#DIV/0!	#DIV/0!	#DIV/0!	#DIV/0!	#DIV/0!
	Image @ 37°C	120																																			#DIV/0!	#DIV/0!	#DIV/0!	#DIV/0!	#DIV/0!	#DIV/0!	#DIV/0!	#DIV/0!	#DIV/0!	#DIV/0!
		360																																			#DIV/0!	#DIV/0!	#DIV/0!	#DIV/0!	#DIV/0!	#DIV/0!	#DIV/0!	#DIV/0!	#DIV/0!	#DIV/0!	#DIV/0!	#DIV/0!
		720																																			#DIV/0!	#DIV/0!	#DIV/0!	#DIV/0!	#DIV/0!	#DIV/0!	#DIV/0!	#DIV/0!	#DIV/0!	#DIV/0!	#DIV/0!	#DIV/0!
	M199-nothing	0
	harvest @ 4°C	30																																			#DIV/0!	#DIV/0!	#DIV/0!	#DIV/0!	#DIV/0!	#DIV/0!	#DIV/0!	#DIV/0!	#DIV/0!	#DIV/0!
	Store @ rt	60																																			#DIV/0!	#DIV/0!	#DIV/0!	#DIV/0!	#DIV/0!	#DIV/0!	#DIV/0!	#DIV/0!	#DIV/0!	#DIV/0!	#DIV/0!
	Image @ 37°C	120																																			#DIV/0!	#DIV/0!	#DIV/0!	#DIV/0!	#DIV/0!	#DIV/0!	#DIV/0!	#DIV/0!	#DIV/0!	#DIV/0!	#DIV/0!	#DIV/0!
		360																																			#DIV/0!	#DIV/0!	#DIV/0!	#DIV/0!	#DIV/0!	#DIV/0!	#DIV/0!	#DIV/0!	#DIV/0!	#DIV/0!
		720																																			#DIV/0!	#DIV/0!	#DIV/0!	#DIV/0!	#DIV/0!	#DIV/0!	#DIV/0!	#DIV/0!	#DIV/0!	#DIV/0!
			231116-17
	M199 no bicab/fb	0	0.958734	0.854216	0.963197	0.977505	0.982565	0.954873	0.978393	0.976553	0.97538	0.958431	0.968265	0.980871	0.955895	0.953358	0.98126
	harvest @ 4°C	30	0.905767	0.970026	0.932625	0.967037	0.971365	0.949311	0.91449	0.950839	0.956058	0.972658	0.898459	0.964752	0.989581	0.971238	0.979258																				-5.77683	0.907737	-2.98294	0.596799	1.04701	-1.24716	-4.86946	-1.08818	-0.545259	1.18155	-6.53708	0.359164	2.94199
	Store @ 4°C	60	0.934491	0.949185	0.902333	0.920042	0.913986	0.965651	0.962917	0.980606	0.95472	0.934001	0.957593	0.937367	0.966685	0.933446	0.946694																				-2.78884	-1.26022	-6.13403	-4.29185	-4.92182	0.452603	0.168231	2.00835	-0.684484	-2.83977	-0.385568	-2.48958	0.560223
	Image @ 37°C	120	0.944449	0.852044	0.869222	0.911803	0.974977	0.960032	0.956712	0.953811	0.977323	0.916544	0.932367	0.948631	0.973895	0.947375	0.978117																				-1.75288	-11.3654	-9.57847	-5.14897	1.4228	-0.131848	-0.477217	-0.779016	1.66682	-4.65579	-3.00976	-1.31783	1.31018
		360	0.955561	0.97727	0.92555	0.954788	0.949908	0.974159	0.915174	0.940007	0.940183	0.952054	0.942315	0.949298	0.929317	0.953445	0.799751																				-0.59703	1.66129	-3.71892	-0.677386	-1.185	1.33774	-4.79827	-2.21496	-2.19666	-0.961851	-1.97488	-1.24853	-3.32705
	231109	720	0.86597	0.867583	0.909486	0.974914	0.971873	0.964147	0.883419	0.901292	0.873919	0.925838	0.976358	0.957653	0.898842	0.918728	0.88189																				-9.9168	-9.74901	-5.38998	1.41625	1.0999	0.296188	-8.10159	-6.24241	-9.08984	-3.68899	1.56648	-0.379376	-6.49721
			231102-03
	M199 no bicab/fb	0	0.923842	0.987677	0.968532	0.946388	0.93145	0.903111	0.958688	0.932569	0.914827	0.872616	0.954936	0.980859	0.918119	0.963164	0.991106	0.942612
	harvest @ 4°C	30	0.946599	0.945855	0.934305		0.915758	0.967566	0.935082	0.978445	0.983823	0.982972	0.97274	0.981919	0.898332	0.944935	0.963867	0.958364																			0.365061	0.286148	-0.938405		-2.9049	2.58808	-0.856034	3.74156	4.31183	4.22154	3.13675	4.10997	-4.75254
	Store @ rt	60	0.906733	0.958855	0.966005		0.974956	0.961144	0.96031	0.954879	0.971991	0.962804	0.871378	0.935701	0.929076	0.939219	0.933278	0.961324																			-3.86184	1.66448	2.42257		3.3717	1.90725	1.81877	1.24294	3.05728	2.0832	-7.61043	-0.79048	-1.49288
	Image @ 37°C	120	0.909152	0.969382	0.9936		0.961997	0.96075	0.975584	0.976905	0.988178	0.994156	0.92783	0.988518	0.945895	0.966359	0.99584	0.989019																			-3.60536	2.78069	5.34844		1.9977	1.86547	3.43821	3.57831	4.77351	5.40739	-1.62501	4.80963	0.290364
		360	0.902004	0.916986	0.946507	0.989837	0.981497	0.980219	0.993455	0.974713	0.986076	0.965349	0.978968	0.96103	0.983652	0.974661	0.937146																				-4.36317	-2.77467	0.355268	4.94949	4.0652	3.92969	5.33309	3.34593	4.55069	2.3531	3.79703	1.89516	4.29367
	231109	720	0.946568	0.989903	0.88902	0.892167	0.905759	0.88338	0.922276	0.96281	0.959454	0.956635	0.953961	0.937979	0.981103	0.946245	0.903604																				0.361772	4.9564	-5.73987	-5.40619	-3.96506	-6.3379	-2.21385	2.08383	1.72799	1.42917	1.14561	-0.548933	4.02345
			231213
	M199 + FBS no bicab	0	0.969854	0.96718	0.978521	0.955451	0.846796	0.964842	0.966815	0.927725	0.952978	0.955734	0.955827	0.98146	0.952485	0.965226	0.958599
	harvest @ 4°C	30	0.979793	0.973002	0.925613	0.929584	0.929019	0.97338	0.928496	0.938154	0.939146	0.96685	0.893591	0.939637	0.940489	0.952692	0.894818																				2.77911	2.06675	-2.90433	-2.48769	-2.54703	2.10639	-2.60182	-1.58872	-1.48473	1.42142	-6.2634	-1.43321	-1.34383
	Store @ 4°C	60	0.939678	0.90834	0.961603	0.948991	0.959528	0.95384	0.940152	0.927509	0.98077	0.968607	0.958101	0.967309	0.905383	0.939143	0.953287																				-1.42886	-4.71615	0.87104	-0.451916	0.653332	0.0566488	-1.37912	-2.70538	2.8816	1.60578	0.503712	1.4696	-5.02633
	Image @ 37°C	120	0.977024	0.932509	0.93931	0.926094	0.918118	0.930998	0.947557	0.918423	0.953693	0.948435	0.946701	0.937345	0.949286	0.969703	0.938534																				2.4887	-2.18094	-1.46746	-2.85387	-3.69055	-2.33935	-0.602394	-3.6585	0.0413153	-0.510274	-0.692202	-1.67356	-0.421016
		360	0.986915	0.979734	0.977256	0.950511	0.916701	0.974353	0.952691	0.934633	0.918104	0.972078	0.974686	0.981064	0.957973	0.981111	0.974836																				3.5262	2.77291	2.51297	-0.292547	-3.83916	2.20844	-0.0638508	-1.95812	-3.69192	1.96984	2.24343	2.91246	0.490276
	240118	720	0.863785	0.946617	0.939495	0.937516	0.970113	0.972902	0.961465	0.968419	0.978875	0.925347	0.96659	0.971233	0.856941	0.972536	0.966308																				-9.38997	-0.701036	-1.4481	-1.65565	1.7637	2.0563	0.856518	1.58597	2.68285	-2.93219	1.3942	1.8812	-10.1079
			231206-7
	M199 + FBS no bicab	0	0.988291	0.956043	0.946374	0.986075	0.991226	0.99091	0.944319	0.955003	0.87614	0.910818	0.854731	0.893062	0.994211	0.885379	0.926569
	harvest @ 4°C	30	0.992691	0.995686	0.967897	0.970459	0.957015	0.98228	0.957046	0.966021	0.976394	0.965576	0.98797	0.983054	0.95935	0.929937	0.948678																				5.61175	5.93046	2.974	3.2465	1.81625	4.50422	1.81954	2.7744	3.87799	2.72708	5.10949	4.58647	2.06469
	Store @ rt	60	0.92501	0.933369	0.924071	0.96771	0.970262	0.971343	0.962675	0.930077	0.982932	0.940147	0.938123	0.956119	0.977197	0.953988	0.99306																				-1.58876	-0.699445	-1.68869	2.95406	3.22557	3.34062	2.41845	-1.04964	4.57353	0.0216508	-0.193636	1.72094	3.96341
	Image @ 37°C	120	0.968289	0.990896	0.987619	0.964929	0.980801	0.978752	0.983521	0.965353	0.976675	0.965305	0.934681	0.965011	0.978588	0.982449	0.971289																				3.01567	5.42088	5.07223	2.65824	4.34684	4.12878	4.63621	2.70335	3.90781	2.69817	-0.559881	2.66696	4.1114
		360	0.956348	0.955601	0.943167	0.923638	0.907827	0.953972	0.931198	0.909847	0.937146	0.983952	0.989925	0.974826	0.956868	0.994301	0.966447																				1.7453	1.66586	0.342923	-1.7347	-3.41684	1.49254	-0.930451	-3.20188	-0.297625	4.68201	5.31754	3.71114	1.80063
	240118	720	0.963785	0.967392	0.981988	0.971986	0.964542	0.949798	0.967297	0.978081	0.952743	0.982947	0.960629	0.965266	0.945055	0.952884	0.969709																				2.53649	2.9202	4.47308	3.40905	2.61706	1.04844	2.91013	4.05741	1.3617	4.57512	2.20075	2.69404	0.543821
			221021
	DMEM-nothing	0	0.914238	0.947128	0.948748	0.969291	0.984811	0.983157	0.942832	0.871046	0.971744	0.930819	0.969651	0.94286	0.956884	0.928249	0.938197
	harvest @ 4°C	30	0.878685	0.947135	0.926439	0.917082	0.938093	0.919909	0.910169	0.957974	0.927729	0.963429	0.956564	0.936836	0.957847	0.970884	0.972756																				-7.17886	0.0518757	-2.13434	-3.12282	-0.903231	-2.82418	-3.85304	1.1969	-1.99803	1.77315	1.04792	-1.03605	1.18352
	Store @ 4°C	60	0.949266	0.920037	0.963557	0.895001	0.932877	0.879229	0.938777	0.978502	0.895827	0.961383	0.982669	0.957759	0.973366	0.916249	0.936197																				0.277068	-2.81059	1.78672	-5.45534	-1.45427	-7.12138	-0.83099	3.36542	-5.36813	1.55704	3.8056	1.17415	2.82285
	Image @ 37°C	120	0.969795	0.938703	0.948539	0.912202	0.984017	0.946606	0.969441	0.98037	0.956903	0.816089	0.858546	0.874559	0.960796	0.966613	0.974707																				2.44564	-0.838852	0.200206	-3.63828	3.94797	-0.00401338	2.40822	3.56269	1.08376	-13.7913	-9.3063	-7.61478	1.49504
		360	0.959548	0.95462	0.958378	0.938582	0.976736	0.879902	0.968258	0.960977	0.962796	0.986539	0.98409	0.990107	0.95954	0.969916	0.936279																				1.36316	0.842601	1.23961	-0.851578	3.17882	-7.05031	2.28325	1.51409	1.70628	4.21444	3.95572	4.59131	1.36236
	221128	720	0.970478	0.967012	0.9859	0.959016	0.986299	0.973639	0.949826	0.968888	0.963225	0.907863	0.937076	0.911181	0.942311	0.923952	0.915581																				2.5178	2.15165	4.14691	1.30695	4.18904	2.85173	0.336167	2.34986	1.75158	-4.09662	-1.01067	-3.7461	-0.457652
			230222-24
	DMEM-nothing	0	0.985855	0.98355	0.969259	0.941331	0.951724	0.972603	0.955825	0.949021	0.952324	0.94455	0.973794	0.958025	0.972863	0.950155	0.951293
	harvest @ 4°C	30	0.988526	0.953027	0.963324	0.966451	0.992731	0.950482	0.96658	0.94781	0.946196	0.95715	0.963837	0.961265	0.962166	0.994402	0.977038																				2.88444	-0.810194	0.261524	0.586941	3.32217	-1.07508	0.600375	-1.35323	-1.52113	-0.381123	0.314912	0.0472248	0.14093
	Store @ rt	60	0.96517	0.971735	0.960915	0.959248	0.977736	0.960262	0.971097	0.946148	0.930902	0.954539	0.980642	0.963018	0.934247	0.97073	0.975414																				0.45358	1.1369	0.0108049	-0.162685	1.76151	-0.0572332	1.07054	-1.52614	-3.11291	-0.652843	2.06397	0.229611	-2.76479
	Image @ 37°C	120	0.965563	0.989438	0.96396	0.990953	0.97918	0.98831	0.95611	0.942636	0.942558	0.989311	0.95305	0.93771	0.933791	0.974348	0.97965																				0.494485	2.97937	0.327664	3.13709	1.91175	2.86197	-0.489287	-1.89172	-1.89981	2.96622	-0.807811	-2.40438	-2.81226
		360	0.935065	0.92496	0.949822	0.935336	0.965381	0.967987	0.920377	0.894386	0.95323	0.982262	0.926552	0.905799	0.959369	0.940803	0.96303																				-2.6797	-3.73141	-1.14381	-2.65145	0.475596	0.746758	-4.20837	-6.91346	-0.789042	2.23249	-3.56567	-5.72567	-0.150182
	221128	720	0.972178	0.964476	0.968407	0.923975	0.961226	0.93608	0.970029	0.946042	0.975363	0.86385	0.938247	0.892448	0.916293	0.970617	0.920701																				1.18298	0.381358	0.790524	-3.83393	0.0431034	-2.57403	0.959317	-1.53718	1.51445	-10.0917	-2.34852	-7.11519	-4.63344
			240501-02
	DMEM+FBS	0	0.952813	0.992619	0.986376	0.937121	0.951422	0.9369	0.926439	0.974328	0.94746	0.97867	0.971825	0.983973	0.979589	0.986618	0.976157
	harvest @ 4°C	30	0.972728	0.94385	0.989269	0.916555	0.946897	0.971358	0.918463	0.934798	0.949419	0.932164	0.966028	0.902353	0.980318	0.98247	0.982339																				0.749917	-2.24108	2.46323	-5.06817	-1.92546	0.608033	-4.87052	-3.17866	-1.66428	-3.45147	0.0559992	-6.53907	1.53612
	Store @ 4°C	60	0.960898	0.981822	0.976246	0.962395	0.970726	0.967464	0.955241	0.936167	0.955668	0.953102	0.957555	0.933426	0.959471	0.97534	0.95625																				-0.475302	1.69186	1.11429	-0.320288	0.542566	0.204738	-1.06121	-3.03686	-1.01704	-1.28276	-0.821569	-3.32078	-0.623084
	Image @ 37°C	120	0.918985	0.953874	0.817157	0.946864	0.897966	0.897146	0.935752	0.953009	0.98508	0.953967	0.983297	0.961257	0.977776	0.939301	0.957136																				-4.81649	-1.20289	-15.3633	-1.92893	-6.99351	-7.07845	-3.07982	-1.29245	2.02932	-1.1932	1.84467	-0.438148	1.27284
		360	0.981088	0.930332	0.9715	0.908697	0.849582	0.975223	0.959472	0.978604	0.97543	0.979281	0.982023	0.964897	0.978701	0.968896	0.986688																				1.6158	-3.64117	0.622731	-5.88201	-12.0049	1.00837	-0.623051	1.35855	1.02977	1.42869	1.71268	-0.0611437	1.36863
	240426	720	0.944071	0.940102	0.922797	0.95152	0.967959	0.898323	0.921456	0.924339	0.927206	0.945274	0.948682	0.942806	0.939426	0.818621	0.939601																				-2.21816	-2.62924	-4.42163	-1.44666	0.25606	-6.9565	-4.56055	-4.26192	-3.96494	-2.09356	-1.7406	-2.34915	-2.69923
			240418
	DMEM+FBS	0	0.901681	0.908351	0.951521	0.939012	0.951148	0.972133	0.939258	0.920892	0.95555	0.855135	0.953016	0.973627	0.934807	0.95091	0.938384
	harvest @ 4°C	30	0.951353	0.974866	0.944439	0.978083	0.977831	0.968955	0.961363	0.985485	0.978332	0.922516	0.963956	0.950791	0.983183	0.965124	0.991517																				1.60098	4.11212	0.862663	4.45563	4.42875	3.48088	2.67007	5.2462	4.48224	-1.47872	2.94691	1.54102	5.00029
	Store @ rt	60	0.952439	0.955062	0.947963	0.980281	0.922899	0.949926	0.990186	0.976395	0.986201	0.949882	0.955009	0.95466	0.990671	0.965306	0.979492																				1.71703	1.99715	1.23902	4.69042	-1.43775	1.44865	5.74824	4.27542	5.32262	1.44388	1.99147	1.95415	5.79998
	Image @ 37°C	120	0.937223	0.968201	0.977366	0.980156	0.96068	0.930425	0.974893	0.967752	0.952537	0.922416	0.971553	0.954599	0.957578	0.990608	0.976992																				0.0919267	3.4003	4.37911	4.67701	2.59712	-0.633993	4.11502	3.35233	1.72749	-1.48939	3.75829	1.94765	2.26581
		360	0.915438	0.943089	0.97515	0.98273	0.959863	0.987665	0.964976	0.971641	0.975394	0.97552	0.92994	0.965664	0.977845	0.983218	0.973032																				-2.23463	0.718439	4.14245	4.952	2.50988	5.47896	3.05587	3.76773	4.16853	4.18193	-0.685792	3.12941	4.43028
	240426	720	0.894692	0.913369	0.865452	0.9806	0.888355	0.946637	0.944483	0.95593	0.974683	0.957565	0.973462	0.974386	0.984524	0.929929	0.97046																				-4.45015	-2.45558	-7.57293	4.72452	-5.12698	1.09731	0.867342	2.08984	4.09255	2.26445	3.9622	4.0608	5.14358
			231026-27
	MEM-nothing	0	0.96438	0.985102	0.970765	0.88341	0.943831	0.933798	0.988048	0.688661	0.892404	0.946907	0.842923	0.942599	0.908295	0.932497	0.96467	0.969748	0.929675
	harvest @ 4°C	30	0.973577	0.980794	0.953956	0.941089	0.936185	0.941382		0.859749	0.796916	0.728065		0.965757	0.98034	0.94255	0.89719	0.975548	0.960365																		5.50177	6.28376	3.37548	1.98122	1.4498	2.0129		-6.83326	-13.6421	-21.1032		4.65432	6.23465
	Store @ 4°C	60	0.988097	0.99334	0.944597	0.927158	0.911857	0.948614		0.969925	0.934554	0.916326		0.976596	0.941446	0.98026	0.95324	0.941585	0.814094																		7.07523	7.64333	2.36129	0.471548	-1.18661	2.79664		5.106	1.27304	-0.702286		5.82891	2.01982
	Image @ 37°C	120	0.942936	0.973293	0.972185	0.961942	0.969546	0.939245		0.893247	0.954934	0.992055		0.972663	0.977985	0.923573	0.914305	0.923033	0.922788																		2.18133	5.471	5.35093	4.2409	5.06494	1.78134		-3.20328	3.4815	7.50411		5.40272	5.9794
		360	0.979315	0.97384	0.933544	0.952777	0.939145	0.959219	0.981315	0.986326	0.976087	0.983767	0.950043	0.969441	0.942903	0.958996	0.963061																				6.12354	5.53024	1.16354	3.24777	1.77056	3.94586	6.34029	6.88332	5.77369	6.60599	2.95146	5.05353	2.17778
	231025	720	0.957803	0.963405	0.949183	0.945242	0.967256	0.985411	0.921915	0.941954	0.965681	0.884408	0.948002	0.945808	0.94977	0.946033	0.946648																				3.79238	4.3995	2.85826	2.43116	4.81676	6.78414	-0.0966572	2.07495	4.64609	-4.16112	2.73027	2.49259	2.92184
			231024
	MEM-nothing	0	0.967691	0.983626	0.955227	0.875999	0.974828	0.921817	0.972639	0.957947	0.950007	0.93492	0.95899	0.945744	0.99082	0.89864	0.891609
	harvest @ 4°C	30	0.99336	0.976864	0.909458	0.956652	0.967639	0.958605	0.962977	0.928707	0.961055	0.944189	0.964947	0.970252	0.991054	0.967166	0.971115																				5.07661	3.33174	-3.79841	1.19367	2.35595	1.40035	1.86274	-1.76226	1.65944	-0.124661	2.0711	2.63233	4.8327
	Store @ rt	60	0.982389	0.961442	0.988146	0.978539	0.96196	0.961602	0.907422	0.940616	0.982649	0.956117	0.989913	0.974257	0.922368	0.922537	0.921751																				3.91618	1.70034	4.52507	3.50885	1.75517	1.71734	-4.01381	-0.502512	3.94367	1.13711	4.71201	3.05591	-2.43284
	Image @ 37°C	120	0.79061	0.926951	0.91122	0.933039	0.961061	0.958489	0.949045	0.985458	0.945722	0.968234	0.984376	0.934356	0.985451	0.982901	0.976345																				-16.3701	-1.948	-3.61207	-1.30402	1.66009	1.38799	0.389025	4.24077	0.0375646	2.41879	4.12635	-1.16471	4.24009
		360	0.975636	0.946246	0.947823	0.919238	0.935817	0.966636	0.98611	0.990933	0.968063	0.987059	0.981944	0.993506	0.962729	0.971105	0.981941																				3.20183	0.0929246	0.259737	-2.76394	-1.01019	2.24984	4.3098	4.81989	2.4008	4.41011	3.86907	5.09204	1.83648
	231025	720	0.835501	0.896635	0.928938	0.973613	0.930468	0.915502	0.958907	0.959189	0.975906	0.988374	0.967451	0.951342	0.94812	0.965373	0.936653																				-11.6215	-5.15481	-1.73787	2.98781	-1.57602	-3.15912	1.43219	1.46208	3.23037	4.54925	2.33599	0.632042	0.291204
			240220-21
	MEM+FBS	0	0.967246	0.921462	0.950095	0.985751	0.978434	0.979256	0.965443	0.984937	0.942138	0.990901	0.977336	0.991578	0.945231	0.916366	0.820746
	harvest @ 4°C	30	0.971015	0.936795	0.897528	0.989265	0.984465	0.972726	0.986395	0.973979	0.988457	0.941408	0.939704	0.974264	0.97741	0.966899	0.949651																				1.7343	-1.85096	-5.96498	3.64638	3.14354	1.91364	3.34568	2.04492	3.56177	-1.36759	-1.54619	2.0747	2.40439
	Store @ 4°C	60	0.974096	0.977085	0.971886	0.984371	0.97163	0.954489	0.970688	0.980136	0.954868	0.946403	0.976848	0.957444	0.933007	0.956784	0.951734																				2.05718	2.37029	1.82562	3.13367	1.7988	0.00286062	1.70013	2.68999	0.0425952	-0.84433	2.34543	0.312508	-2.2478
	Image @ 37°C	120	0.916723	0.936989	0.968795	0.936058	0.976115	0.978288	0.960243	0.966191	0.972228	0.968535	0.951344	0.971914	0.93183	0.956527	0.93466																				-3.95388	-1.83064	1.50177	-1.92813	2.26866	2.49632	0.605739	1.2289	1.8614	1.47451	-0.326626	1.82855	-2.37112
		360	0.944131	0.987634	0.955731	0.969244	0.965532	0.954362	0.935109	0.959547	0.972076	0.980929	0.970606	0.933	0.972856	0.97133	0.981467																				-1.0823	3.47556	0.133058	1.54879	1.15991	-0.010376	-2.02754	0.532781	1.84551	2.77304	1.69146	-2.24856	1.92721
	240208	720	0.934797	0.978138	0.938679	0.941985	0.859664	0.923694	0.902489	0.963756	0.972332	0.910273	0.938193	0.966887	0.753972	0.896661	0.796825																				-2.06029	2.48058	-1.65357	-1.3072	-9.93202	-3.22354	-5.44525	0.973776	1.87236	-4.62965	-1.70446	1.30181	-21.0055
			240214
	MEM+FBS	0	0.98227	0.970922	0.983359	0.963715	0.963783	0.991895	0.976238	0.985385	0.980433
	harvest @ 4°C	30	0.973829	0.968672	0.959794	0.995863	0.986221	0.982416	0.98505	0.991468	0.975188																										-0.38124	-0.908789	-1.81691	1.87277	0.886439	0.497194	0.766612	1.42316	-0.242172
	Store @ rt	60	0.980468	0.984626	0.971755	0.984493	0.981017	0.975147	0.976401	0.927987	0.980418																										0.297981	0.723293	-0.593399	0.709662	0.354144	-0.246356	-0.118132	-5.07062	0.292776
	Image @ 37°C	120	0.969721	0.979438	0.98453	0.967524	0.968133	0.969537	0.987631	0.985238	0.991377																										-0.801472	0.192527	0.713428	-1.02613	-0.963882	-0.820219	1.03069	0.785848	1.41392
		360	0.96207	0.968487	0.9595	0.969933	0.955797	0.975234	0.973072	0.971415	0.959206				0.96902	0.956569	0.952953																				-1.58406	-0.927713	-1.84699	-0.779772	-2.22579	-0.237472	-0.458679	-0.628199	-1.87708				-0.87311
	240208	720	0.935665	0.916851	0.936921	0.958287	0.962124	0.967168	0.962983	0.969034	0.967513	0.957539	0.958185	0.968258																							-4.28519	-6.20978	-4.1568	-1.97106	-1.57854	-1.06255	-1.49076	-0.871734	-1.02735	-2.04756	-1.98152	-0.95112
[truncated: 16 more columns]
